# Supplementary material for: Identification of substrates of palmitoyl protein thioesterase 1 highlights roles of depalmitoylation in disulfide bond formation and synaptic function
Source: PubMed Central journal article supplement (PMC9004782; doi:10.1371/journal.pbio.3001590), 2022-03-31
Supplement: pbio.3001590.s002.pdf [file pbio.3001590.s002.pdf]

**S1 Table. WT and PPT1 KO synaptic protein expression.** Average KO/WT protein expression ratios for data shown in **Figure 2D**. P-values were calculated using two-tailed t-tests. Blue denotes decreases (<1.5 fold), red denotes increases (>1.5 fold), while black denotes unchanged expression.

| Uniprot ID  | Average Ratio (KO/WT) | P value    |
|-------------|-----------------------|------------|
| PPT1_MOUSE  | 0.1324065             | 1.9306E-07 |
| ASAH1_MOUSE | 2.03207633            | 7.1104E-08 |
| CATD_MOUSE  | 1.9598571             | 2.0852E-10 |
| CX7A2_MOUSE | 1.89377338            | 0.02926753 |
| GFAP_MOUSE  | 1.58759041            | 0.00525781 |
| NDUF4_MOUSE | 1.55884846            | 0.0073044  |
| NU4M_MOUSE  | 1.53679812            | 0.01790171 |
| SAP_MOUSE   | 3.07387932            | 6.389E-11  |
| SCRB2_MOUSE | 1.87158589            | 0.00153495 |
| TOM7_MOUSE  | 1.74901867            | 0.00948743 |
| TPP1_MOUSE  | 2.73139373            | 7.4374E-08 |
| 1433B_MOUSE | 0.98583501            | 0.5571686  |
| 1433E_MOUSE | 0.98173666            | 0.47927337 |
| 1433F_MOUSE | 0.92138057            | 0.09023641 |
| 1433G_MOUSE | 0.94088453            | 0.13610869 |
| 1433T_MOUSE | 0.9064798             | 0.05521134 |
| 1433Z_MOUSE | 0.91939427            | 0.03163892 |
| 2A5B_MOUSE  | 0.91767961            | 0.17958149 |
| 2A5E_MOUSE  | 0.93588692            | 0.20594846 |
| 2A5G_MOUSE  | 0.92516276            | 0.27527372 |
| 2AAA_MOUSE  | 0.95194269            | 0.21285607 |
| 2ABA_MOUSE  | 0.95367966            | 0.22598709 |
| 3HIDH_MOUSE | 1.04327957            | 0.79398386 |
| 4F2_MOUSE   | 1.02898308            | 0.66595994 |
| 68MP_MOUSE  | 1.2916347             | 0.1393345  |
| 6PGD_MOUSE  | 0.98481313            | 0.75742688 |
| 6PGL_MOUSE  | 0.99064213            | 0.75351609 |
| A4_MOUSE    | 0.91521678            | 0.11759947 |
| AACS_MOUSE  | 0.90033075            | 0.14738068 |
| AAK1_MOUSE  | 0.98735689            | 0.64757685 |
| AATC_MOUSE  | 0.99724389            | 0.88741276 |
| AATM_MOUSE  | 1.01539692            | 0.81680797 |
| ABCB7_MOUSE | 1.03437721            | 0.72455275 |
| ABCB8_MOUSE | 0.92454716            | 0.04636432 |

|             |            |            |
|-------------|------------|------------|
| ABCD3_MOUSE | 1.05480501 | 0.51271416 |
| ABD12_MOUSE | 1.01144992 | 0.72044301 |
| ABHDA_MOUSE | 1.11382811 | 0.31998147 |
| ABHGA_MOUSE | 0.94834703 | 0.23558947 |
| ABI1_MOUSE  | 1.00358768 | 0.84630625 |
| ABI2_MOUSE  | 0.89302221 | 0.16879112 |
| ABLM1_MOUSE | 0.99187713 | 0.62553276 |
| ABLM2_MOUSE | 0.98401907 | 0.70335008 |
| ABR_MOUSE   | 0.98729854 | 0.6186061  |
| ACACA_MOUSE | 0.94863088 | 0.29824119 |
| ACAD8_MOUSE | 0.95668948 | 0.37781067 |
| ACAD9_MOUSE | 0.9803481  | 0.49322535 |
| ACADL_MOUSE | 1.11932528 | 0.07927052 |
| ACADM_MOUSE | 1.04129721 | 0.52577499 |
| ACADS_MOUSE | 1.0463713  | 0.82805935 |
| ACADV_MOUSE | 1.03872925 | 0.38873496 |
| ACBD6_MOUSE | 0.89777266 | 0.10916865 |
| ACBG1_MOUSE | 0.9736729  | 0.50146583 |
| ACBP_MOUSE  | 0.94736514 | 0.34919227 |
| ACDSB_MOUSE | 1.02078461 | 0.76794946 |
| ACES_MOUSE  | 0.96364846 | 0.54106011 |
| ACLY_MOUSE  | 0.98858338 | 0.64280925 |
| ACO11_MOUSE | 0.97019004 | 0.46162536 |
| ACO13_MOUSE | 1.07276753 | 0.30443162 |
| ACOC_MOUSE  | 1.02463082 | 0.62056124 |
| ACON_MOUSE  | 1.02583766 | 0.81032263 |
| ACOT9_MOUSE | 1.05205746 | 0.23715939 |
| ACOX1_MOUSE | 1.35749642 | 0.01158117 |
| ACPM_MOUSE  | 1.15626307 | 0.05123628 |
| ACSF2_MOUSE | 1.19753129 | 0.02615009 |
| ACSF3_MOUSE | 1.02599796 | 0.83642539 |
| ACSL1_MOUSE | 1.03678754 | 0.49813489 |
| ACSL3_MOUSE | 1.00424691 | 0.83509572 |
| ACSL6_MOUSE | 1.04949839 | 0.22151683 |
| ACTB_MOUSE  | 0.92146447 | 0.09707842 |
| ACTC_MOUSE  | 1.08163565 | 0.54517998 |
| ACTG_MOUSE  | 0.94785731 | 0.3123261  |
| ACTN1_MOUSE | 1.04246345 | 0.58964527 |
| ACTN2_MOUSE | 1.00436901 | 0.9617644  |

|             |            |            |
|-------------|------------|------------|
| ACTN4_MOUSE | 0.89503777 | 0.0658385  |
| ACTY_MOUSE  | 1.01662349 | 0.64068865 |
| ACTZ_MOUSE  | 1.00274656 | 0.90438894 |
| ACY2_MOUSE  | 0.75121584 | 0.00017773 |
| ACYP1_MOUSE | 0.95202532 | 0.200298   |
| ADA11_MOUSE | 1.01879609 | 0.85015647 |
| ADA22_MOUSE | 1.04358024 | 0.76282963 |
| ADA23_MOUSE | 0.99141222 | 0.6482934  |
| ADCK1_MOUSE | 0.99950778 | 0.98478884 |
| ADCY5_MOUSE | 0.93989396 | 0.1990365  |
| ADCY9_MOUSE | 0.97061256 | 0.48192215 |
| ADDA_MOUSE  | 1.00947852 | 0.86514912 |
| ADDB_MOUSE  | 1.04320106 | 0.21928638 |
| ADDG_MOUSE  | 0.98292048 | 0.55179324 |
| ADHX_MOUSE  | 0.95361516 | 0.0875614  |
| ADK_MOUSE   | 1.02157436 | 0.87405279 |
| ADPRH_MOUSE | 1.03361479 | 0.68142929 |
| ADT1_MOUSE  | 1.00478358 | 0.92765781 |
| ADT2_MOUSE  | 0.99952531 | 0.75706883 |
| AFAD_MOUSE  | 1.0307234  | 0.78500273 |
| AFG32_MOUSE | 0.99103875 | 0.6276594  |
| AGAP2_MOUSE | 0.98011748 | 0.47876885 |
| AGAP3_MOUSE | 0.99019542 | 0.68336469 |
| AGFG1_MOUSE | 1.00131728 | 0.92463358 |
| AGK_MOUSE   | 1.08320684 | 0.62013365 |
| AGM1_MOUSE  | 0.88484876 | 0.0086762  |
| AGRL1_MOUSE | 1.01473453 | 0.78894441 |
| AGRL3_MOUSE | 0.94233571 | 0.25288306 |
| AHSA1_MOUSE | 1.03581732 | 0.67341969 |
| AIFM1_MOUSE | 0.97016079 | 0.40862561 |
| AINX_MOUSE  | 1.15678731 | 0.12331887 |
| AK1A1_MOUSE | 0.98262512 | 0.52720552 |
| AKA12_MOUSE | 0.88688352 | 0.23433627 |
| AKA7A_MOUSE | 1.01473012 | 0.82872316 |
| AKAP5_MOUSE | 1.01304215 | 0.95406776 |
| AKCL2_MOUSE | 1.01667196 | 0.94332204 |
| AL1A1_MOUSE | 1.01979462 | 0.79180123 |
| AL1B1_MOUSE | 0.99870187 | 0.77295367 |
| AL1L1_MOUSE | 1.033779   | 0.55294913 |

|             |            |            |
|-------------|------------|------------|
| AL3A2_MOUSE | 0.96422921 | 0.43583518 |
| AL4A1_MOUSE | 1.07133763 | 0.26487501 |
| AL7A1_MOUSE | 1.11255825 | 0.11033686 |
| AL9A1_MOUSE | 1.04619003 | 0.33937178 |
| ALBU_MOUSE  | 0.73056189 | 0.00300301 |
| ALDH2_MOUSE | 1.01015857 | 0.8397427  |
| ALDOA_MOUSE | 1.01221097 | 0.9584375  |
| ALDOC_MOUSE | 1.05019299 | 0.51227259 |
| ALDR_MOUSE  | 0.97163715 | 0.36689111 |
| ALG2_MOUSE  | 0.94537116 | 0.35234149 |
| ALR_MOUSE   | 0.9387795  | 0.46413448 |
| AMD_MOUSE   | 1.09569923 | 0.22764743 |
| AMPB_MOUSE  | 0.9187945  | 0.13921191 |
| AMPD2_MOUSE | 1.04600762 | 0.52170757 |
| AMPH_MOUSE  | 0.8869798  | 0.07170537 |
| AMPL_MOUSE  | 1.08568661 | 0.23477562 |
| AMRP_MOUSE  | 0.95903601 | 0.41822429 |
| AN32A_MOUSE | 0.86474585 | 0.03681287 |
| ANK1_MOUSE  | 1.04075792 | 0.81146394 |
| ANK2_MOUSE  | 1.00200971 | 0.84572697 |
| ANK3_MOUSE  | 1.01682377 | 0.85371332 |
| ANM5_MOUSE  | 0.90454203 | 0.07330723 |
| ANS1B_MOUSE | 0.9868218  | 0.55807941 |
| ANXA3_MOUSE | 0.96377447 | 0.57577386 |
| ANXA5_MOUSE | 1.06104112 | 0.0196424  |
| ANXA6_MOUSE | 1.02629433 | 0.33126602 |
| ANXA7_MOUSE | 0.90795603 | 0.21982937 |
| AOFA_MOUSE  | 1.03214509 | 0.27253897 |
| AOFB_MOUSE  | 1.13364749 | 0.10433588 |
| AP180_MOUSE | 1.01811375 | 0.86287515 |
| AP1B1_MOUSE | 1.0048851  | 0.85289081 |
| AP1G1_MOUSE | 1.02365273 | 0.58922965 |
| AP1M1_MOUSE | 1.00142115 | 0.91196347 |
| AP2A1_MOUSE | 0.9960234  | 0.77657554 |
| AP2A2_MOUSE | 1.00618472 | 0.9535714  |
| AP2B1_MOUSE | 0.99987012 | 0.83752095 |
| AP2M1_MOUSE | 0.98002538 | 0.58189395 |
| AP2S1_MOUSE | 0.95923402 | 0.36236442 |
| AP3B2_MOUSE | 0.97649273 | 0.38641444 |

|             |            |            |
|-------------|------------|------------|
| AP3D1_MOUSE | 1.03504899 | 0.44215605 |
| AP3M2_MOUSE | 0.92518115 | 0.25674898 |
| APEH_MOUSE  | 1.02170056 | 0.86370785 |
| APMAP_MOUSE | 1.15227943 | 0.07341667 |
| APOE_MOUSE  | 1.0812543  | 0.56552118 |
| AQP4_MOUSE  | 1.28825636 | 0.00808742 |
| ARBK1_MOUSE | 1.0158497  | 0.9584319  |
| ARC1A_MOUSE | 1.0531272  | 0.6923467  |
| ARF1_MOUSE  | 1.0347915  | 0.83563863 |
| ARF5_MOUSE  | 1.06912599 | 0.44875724 |
| ARF6_MOUSE  | 1.14332595 | 0.18694691 |
| ARFG1_MOUSE | 0.96255979 | 0.33486025 |
| ARHG2_MOUSE | 0.99281239 | 0.67501943 |
| ARHG7_MOUSE | 1.27181402 | 0.418026   |
| ARK72_MOUSE | 1.08551521 | 0.16493593 |
| ARL3_MOUSE  | 1.04119279 | 0.60250279 |
| ARL6_MOUSE  | 0.95776521 | 0.33337084 |
| ARL8A_MOUSE | 1.37307239 | 0.20876189 |
| ARL8B_MOUSE | 1.18856673 | 2.5796E-07 |
| ARLY_MOUSE  | 0.99671467 | 0.86622609 |
| ARM10_MOUSE | 0.97750237 | 0.47536565 |
| ARMC1_MOUSE | 1.10962526 | 0.34182471 |
| ARP10_MOUSE | 0.98782761 | 0.70727122 |
| ARP2_MOUSE  | 1.00865463 | 0.8602501  |
| ARP3_MOUSE  | 1.02234308 | 0.85924876 |
| ARP3B_MOUSE | 0.97602424 | 0.38563952 |
| ARP5L_MOUSE | 0.97062534 | 0.32796031 |
| ARPC2_MOUSE | 1.05881648 | 0.64536015 |
| ARPC3_MOUSE | 0.98864959 | 0.60010269 |
| ARPC4_MOUSE | 1.00251771 | 0.97396826 |
| ARPC5_MOUSE | 1.00454984 | 0.88192802 |
| ARRB1_MOUSE | 1.17781089 | 0.09450326 |
| ASAP1_MOUSE | 1.02446025 | 0.44293523 |
| ASGL1_MOUSE | 0.98519099 | 0.50916938 |
| ASNA_MOUSE  | 1.04192616 | 0.38204748 |
| ASSY_MOUSE  | 1.11586184 | 0.02223865 |
| ASTN1_MOUSE | 0.9876944  | 0.77449576 |
| AT1A1_MOUSE | 0.9595546  | 0.31795481 |
| AT1A2_MOUSE | 1.06757864 | 0.4977135  |

|             |            |            |
|-------------|------------|------------|
| AT1A3_MOUSE | 1.04236915 | 0.69483968 |
| AT1A4_MOUSE | 1.04424697 | 0.91097065 |
| AT1B1_MOUSE | 0.98238956 | 0.53580402 |
| AT1B2_MOUSE | 1.04328394 | 0.47105468 |
| AT1B3_MOUSE | 0.99751792 | 0.84914292 |
| AT2A2_MOUSE | 1.0596817  | 0.16985843 |
| AT2B1_MOUSE | 1.0270506  | 0.86560869 |
| AT2B2_MOUSE | 1.01730849 | 0.99801045 |
| AT2B4_MOUSE | 0.99535077 | 0.73609152 |
| AT5F1_MOUSE | 1.00319234 | 0.87444768 |
| AT8A1_MOUSE | 0.96619097 | 0.34216116 |
| ATAD1_MOUSE | 1.04746733 | 0.45438604 |
| ATAD3_MOUSE | 0.98255806 | 0.45504613 |
| ATCAY_MOUSE | 1.05933576 | 0.39736066 |
| ATIF1_MOUSE | 1.05066462 | 0.6879365  |
| ATLA1_MOUSE | 0.97194914 | 0.4438328  |
| ATOX1_MOUSE | 0.93376963 | 0.15060377 |
| ATP5E_MOUSE | 1.00809842 | 0.99806239 |
| ATP5H_MOUSE | 0.92005157 | 0.09611631 |
| ATP5I_MOUSE | 0.97613267 | 0.42718863 |
| ATP5L_MOUSE | 1.09959222 | 0.18266955 |
| ATP5S_MOUSE | 1.03155476 | 0.8118487  |
| ATPA_MOUSE  | 0.99393389 | 0.72710112 |
| ATPB_MOUSE  | 1.0172077  | 0.86278579 |
| ATPD_MOUSE  | 0.99637597 | 0.93358862 |
| ATPG_MOUSE  | 1.00122588 | 0.77843614 |
| ATPK_MOUSE  | 0.98789021 | 0.60452132 |
| ATPO_MOUSE  | 1.05952768 | 0.27717713 |
| ATX10_MOUSE | 0.98139324 | 0.57779581 |
| AUHM_MOUSE  | 0.97972141 | 0.62492621 |
| AUXI_MOUSE  | 0.98502072 | 0.58811037 |
| AVL9_MOUSE  | 0.93631189 | 0.12373438 |
| B2L13_MOUSE | 1.06604817 | 0.93140479 |
| BACH_MOUSE  | 0.99629742 | 0.82209133 |
| BAG5_MOUSE  | 0.89824369 | 0.17397646 |
| BAG6_MOUSE  | 0.92829455 | 0.32757858 |
| BAIP2_MOUSE | 0.91716911 | 0.05178492 |
| BAP31_MOUSE | 1.09602585 | 0.48593776 |
| BASI_MOUSE  | 0.92651477 | 0.10129023 |

|             |            |            |
|-------------|------------|------------|
| BASP1_MOUSE | 0.8743612  | 0.19000108 |
| BCAS1_MOUSE | 0.90566058 | 0.05902413 |
| BCAS3_MOUSE | 0.96906907 | 0.34555007 |
| BCAT1_MOUSE | 1.07346554 | 0.19801492 |
| BCS1_MOUSE  | 1.13379284 | 0.20483242 |
| BDH_MOUSE   | 0.96620927 | 0.33887951 |
| BGAL_MOUSE  | 0.93461801 | 0.2449892  |
| BIG3_MOUSE  | 0.89871907 | 0.08650094 |
| BIN1_MOUSE  | 0.90107359 | 0.04818179 |
| BLMH_MOUSE  | 0.92873827 | 0.10889336 |
| BOLA1_MOUSE | 0.94794213 | 0.50879243 |
| BORG4_MOUSE | 0.93035347 | 0.18178535 |
| BPHL_MOUSE  | 1.04955425 | 0.60709743 |
| BPNT1_MOUSE | 0.99460767 | 0.69089273 |
| BRNP1_MOUSE | 1.29594192 | 0.08909956 |
| BRSK2_MOUSE | 1.0463491  | 0.855304   |
| BSN_MOUSE   | 1.00353359 | 0.83568539 |
| BTBDH_MOUSE | 1.212659   | 0.46128881 |
| C170B_MOUSE | 1.15183827 | 0.12726058 |
| C1QBP_MOUSE | 1.0023987  | 0.92550211 |
| C1TC_MOUSE  | 1.00011439 | 0.72533191 |
| C1TM_MOUSE  | 0.98036808 | 0.48750339 |
| C2C2L_MOUSE | 1.0179609  | 0.8488582  |
| C560_MOUSE  | 1.25260395 | 0.03019851 |
| CA198_MOUSE | 1.15048926 | 0.74403633 |
| CA2D1_MOUSE | 0.95154417 | 0.26865256 |
| CA2D2_MOUSE | 1.02906302 | 0.94937902 |
| CA2D3_MOUSE | 1.01430167 | 0.95635947 |
| CAB39_MOUSE | 0.9523452  | 0.10933287 |
| CAC1A_MOUSE | 0.98578988 | 0.63522475 |
| CAC1B_MOUSE | 1.04865125 | 0.32909221 |
| CAC1E_MOUSE | 0.92656924 | 0.07838562 |
| CACB4_MOUSE | 0.96890641 | 0.45065068 |
| CACP_MOUSE  | 1.04455971 | 0.36116959 |
| CAD10_MOUSE | 0.95799348 | 0.45151004 |
| CAD13_MOUSE | 1.08840294 | 0.29656473 |
| CADH2_MOUSE | 0.92883115 | 0.14238845 |
| CADM1_MOUSE | 0.99888376 | 0.92261315 |
| CADM2_MOUSE | 0.98822666 | 0.55928359 |

|             |            |            |
|-------------|------------|------------|
| CADM3_MOUSE | 0.96229727 | 0.23162547 |
| CADM4_MOUSE | 0.99921341 | 0.74677347 |
| CAH2_MOUSE  | 0.9190263  | 0.15752963 |
| CAH4_MOUSE  | 0.94563712 | 0.33906131 |
| CALB1_MOUSE | 0.94978381 | 0.12675795 |
| CALB2_MOUSE | 0.84185513 | 0.00569191 |
| CALR_MOUSE  | 1.1544788  | 0.0004207  |
| CALU_MOUSE  | 0.91843886 | 0.28027337 |
| CALX_MOUSE  | 0.9622982  | 0.36377171 |
| CAMKV_MOUSE | 1.00538188 | 0.90275622 |
| CAN2_MOUSE  | 1.2112102  | 0.67318094 |
| CAN5_MOUSE  | 0.96056614 | 0.36313268 |
| CANB1_MOUSE | 0.86871042 | 0.01601081 |
| CAND1_MOUSE | 0.95910474 | 0.16247384 |
| CAP1_MOUSE  | 0.89514036 | 0.06809104 |
| CAP2_MOUSE  | 0.98840445 | 0.7293977  |
| CAPS1_MOUSE | 0.98369221 | 0.58325628 |
| CAPS2_MOUSE | 0.98320306 | 0.67393579 |
| CAPZB_MOUSE | 1.00533049 | 0.73747021 |
| CATA_MOUSE  | 1.04312494 | 0.64012675 |
| CATB_MOUSE  | 0.93026251 | 0.25469791 |
| CAZA2_MOUSE | 0.97450427 | 0.24086604 |
| CBPE_MOUSE  | 1.05094231 | 0.23541524 |
| CBR1_MOUSE  | 0.97982834 | 0.58748925 |
| CBR3_MOUSE  | 0.93294688 | 0.28053853 |
| CBR4_MOUSE  | 1.0835083  | 0.09933198 |
| CC127_MOUSE | 1.5830901  | 0.44604952 |
| CC177_MOUSE | 0.90653937 | 0.17033253 |
| CC50A_MOUSE | 1.01095507 | 0.83571496 |
| CCD22_MOUSE | 0.82714551 | 0.03377642 |
| CCD51_MOUSE | 1.14015917 | 0.36030134 |
| CCD58_MOUSE | 0.84892381 | 0.01618713 |
| CCG8_MOUSE  | 0.99124283 | 0.63643284 |
| CCHL_MOUSE  | 1.01307138 | 0.96567431 |
| CCNY_MOUSE  | 0.92286009 | 0.13024897 |
| CD166_MOUSE | 1.05170851 | 0.60211882 |
| CD47_MOUSE  | 0.96876125 | 0.36990625 |
| CD81_MOUSE  | 1.03479067 | 0.93953981 |
| CDC37_MOUSE | 1.00944186 | 0.87190281 |



|             |            |            |
|-------------|------------|------------|
| CDC42_MOUSE | 1.16481882 | 0.07457434 |
| CDK14_MOUSE | 1.03842199 | 0.66498252 |
| CDK5_MOUSE  | 0.94135374 | 0.18021069 |
| CDS2_MOUSE  | 1.06361652 | 0.66715341 |
| CDV3_MOUSE  | 0.84562167 | 0.00777649 |
| CE170_MOUSE | 0.95359754 | 0.19655359 |
| CH10_MOUSE  | 1.01405085 | 0.7927479  |
| CH60_MOUSE  | 1.05026896 | 0.44901962 |
| CHM4B_MOUSE | 0.88615465 | 0.07725902 |
| CHP1_MOUSE  | 0.97361276 | 0.59807413 |
| CHRD1_MOUSE | 1.11581416 | 0.44098761 |
| CI172_MOUSE | 0.86262242 | 0.07564175 |
| CISD1_MOUSE | 0.99149775 | 0.63514151 |
| CISY_MOUSE  | 1.01336742 | 0.85909404 |
| CK054_MOUSE | 0.88981071 | 0.03886698 |
| CKAP5_MOUSE | 0.93671912 | 0.00571075 |
| CLAP1_MOUSE | 1.01745178 | 0.89076905 |
| CLAP2_MOUSE | 1.02172874 | 0.88773472 |
| CLCA_MOUSE  | 0.84338981 | 0.013501   |
| CLCB_MOUSE  | 0.82982504 | 0.00669776 |
| CLCN3_MOUSE | 1.29392742 | 0.22838283 |
| CLD11_MOUSE | 0.81911986 | 0.01197204 |
| CLH1_MOUSE  | 0.99784733 | 0.80263571 |
| CLIC4_MOUSE | 0.93548445 | 0.17646921 |
| CLIP2_MOUSE | 0.94767997 | 0.33256559 |
| CLPB_MOUSE  | 1.00440141 | 0.887557   |
| CLPP_MOUSE  | 1.07192347 | 0.51639365 |
| CLUS_MOUSE  | 1.08039679 | 0.37687686 |
| CLYBL_MOUSE | 1.07281643 | 0.04874069 |
| CMC1_MOUSE  | 1.03860837 | 0.59507996 |
| CMPK2_MOUSE | 1.08749447 | 0.32077969 |
| CMTD1_MOUSE | 1.34726272 | 0.07243413 |
| CN166_MOUSE | 0.91843793 | 0.19818151 |
| CN37_MOUSE  | 0.92125707 | 0.39967553 |
| CNDP2_MOUSE | 0.9815315  | 0.54505329 |
| CNKR2_MOUSE | 0.920793   | 0.01017472 |
| CNRP1_MOUSE | 1.03108139 | 0.83873952 |
| CNTFR_MOUSE | 1.37733168 | 0.01384741 |
| CNTN1_MOUSE | 0.98686495 | 0.60633784 |

|             |            |            |
|-------------|------------|------------|
| CNTN2_MOUSE | 1.03331635 | 0.70007104 |
| CNTP1_MOUSE | 0.97170666 | 0.46900266 |
| CNTP2_MOUSE | 1.01686306 | 0.89940382 |
| COA3_MOUSE  | 0.98716024 | 0.54723272 |
| COASY_MOUSE | 1.15434533 | 0.03977472 |
| COF1_MOUSE  | 0.91900253 | 0.03557167 |
| COF2_MOUSE  | 0.94253162 | 0.09981511 |
| COQ3_MOUSE  | 0.90916542 | 0.05388269 |
| COQ7_MOUSE  | 1.04636963 | 0.48710164 |
| COQ9_MOUSE  | 0.96062365 | 0.15531676 |
| COR1A_MOUSE | 0.9190303  | 0.16189404 |
| COR1B_MOUSE | 1.04250741 | 0.81872739 |
| COR1C_MOUSE | 0.99253369 | 0.70772359 |
| COR2B_MOUSE | 1.03678945 | 0.42309674 |
| COTL1_MOUSE | 1.02943345 | 0.07583358 |
| COX1_MOUSE  | 1.17569611 | 0.04054381 |
| COX2_MOUSE  | 1.0305403  | 0.50737917 |
| COX41_MOUSE | 0.97846337 | 0.46640039 |
| COX5A_MOUSE | 0.84849241 | 0.00315668 |
| COX5B_MOUSE | 0.94679574 | 0.15242048 |
| COX6C_MOUSE | 1.08279404 | 0.37027397 |
| CP46A_MOUSE | 1.04310061 | 0.53548127 |
| CPLX1_MOUSE | 0.81098979 | 0.00115705 |
| CPLX2_MOUSE | 0.91795691 | 0.08469109 |
| CPNE4_MOUSE | 0.99782195 | 0.84431327 |
| CPNE5_MOUSE | 0.98856654 | 0.58965193 |
| CPNE6_MOUSE | 1.02713074 | 0.89167052 |
| CPNS1_MOUSE | 0.98284553 | 0.57231254 |
| CPT1A_MOUSE | 1.06855799 | 0.19259065 |
| CPT2_MOUSE  | 1.11046303 | 0.07564793 |
| CRIP2_MOUSE | 0.94383489 | 0.19591961 |
| CRK_MOUSE   | 0.93457824 | 0.25668922 |
| CRKL_MOUSE  | 0.94071745 | 0.25477558 |
| CRYAB_MOUSE | 0.97876345 | 0.63069604 |
| CRYM_MOUSE  | 1.05918965 | 0.51321635 |
| CSDE1_MOUSE | 0.99040543 | 0.57757061 |
| CSK21_MOUSE | 0.99106267 | 0.71192639 |
| CSK22_MOUSE | 1.08951809 | 0.45089363 |
| CSK2B_MOUSE | 0.95229064 | 0.4786563  |

|             |            |            |
|-------------|------------|------------|
| CSKI1_MOUSE | 0.98333622 | 0.58862239 |
| CSKP_MOUSE  | 1.07619916 | 0.00986741 |
| CSN1_MOUSE  | 1.05542673 | 0.16096471 |
| CSN2_MOUSE  | 0.95422923 | 0.23502523 |
| CSN3_MOUSE  | 0.98074366 | 0.56895981 |
| CSN4_MOUSE  | 0.88975204 | 0.06950214 |
| CSN5_MOUSE  | 0.98075794 | 0.52192456 |
| CSN6_MOUSE  | 0.93798092 | 0.0997927  |
| CSN7A_MOUSE | 1.13906556 | 0.18974143 |
| CSN8_MOUSE  | 0.92506182 | 0.14692901 |
| CSPG2_MOUSE | 0.99899671 | 0.78582444 |
| CSPG5_MOUSE | 0.99269714 | 0.83121483 |
| CSRP1_MOUSE | 1.01129448 | 0.97490544 |
| CTBP1_MOUSE | 1.00547639 | 0.95769061 |
| CTL1_MOUSE  | 1.03967704 | 0.82031314 |
| CTL2_MOUSE  | 1.14361577 | 0.00165209 |
| CTNA2_MOUSE | 1.01094537 | 0.88083354 |
| CTNB1_MOUSE | 1.05338736 | 0.5272842  |
| CTND1_MOUSE | 1.02841053 | 0.51018581 |
| CTND2_MOUSE | 1.02757612 | 0.98433427 |
| CTRO_MOUSE  | 1.03887563 | 0.39144788 |
| CTTB2_MOUSE | 1.02500665 | 0.88456958 |
| CUL1_MOUSE  | 1.11502018 | 0.33760585 |
| CUL2_MOUSE  | 1.09130302 | 0.05861195 |
| CUL3_MOUSE  | 0.96472128 | 0.30651475 |
| CUL5_MOUSE  | 0.98430693 | 0.57982141 |
| CX6B1_MOUSE | 0.9192662  | 0.22444627 |
| CXA1_MOUSE  | 1.2141345  | 0.00626056 |
| CY1_MOUSE   | 1.01025959 | 0.99007648 |
| CYB5_MOUSE  | 0.96179705 | 0.34467179 |
| CYB5B_MOUSE | 1.15539448 | 0.4025798  |
| CYBP_MOUSE  | 1.07062605 | 0.33654221 |
| CYC_MOUSE   | 0.89801836 | 0.28862416 |
| CYFP1_MOUSE | 1.05671175 | 0.369241   |
| CYFP2_MOUSE | 1.01266061 | 0.9889635  |
| CYTB_MOUSE  | 1.17074555 | 0.08209781 |
| CYTC_MOUSE  | 1.04549651 | 0.70773885 |
| CYTSB_MOUSE | 0.9534108  | 0.32053881 |
| D39U1_MOUSE | 1.07272007 | 0.63741409 |

|             |            |            |
|-------------|------------|------------|
| DAAM1_MOUSE | 0.99471311 | 0.59917324 |
| DBNL_MOUSE  | 0.90593185 | 0.07662524 |
| DC1I1_MOUSE | 1.06843691 | 0.42622884 |
| DC1I2_MOUSE | 0.98030454 | 0.60169112 |
| DC1L1_MOUSE | 0.95942033 | 0.15816691 |
| DC1L2_MOUSE | 0.94577638 | 0.18708307 |
| DCE1_MOUSE  | 1.01945279 | 0.89450169 |
| DCE2_MOUSE  | 1.05164401 | 0.24559098 |
| DCLK1_MOUSE | 1.02631587 | 0.72575584 |
| DCNL1_MOUSE | 0.93018092 | 0.45316203 |
| DCTN1_MOUSE | 0.97410227 | 0.3428325  |
| DCTN2_MOUSE | 0.8723489  | 0.04879818 |
| DCTN3_MOUSE | 0.96010336 | 0.32108891 |
| DCTN4_MOUSE | 0.9120714  | 0.02269415 |
| DDAH1_MOUSE | 1.00657171 | 0.79241971 |
| DDAH2_MOUSE | 0.89077874 | 0.01788754 |
| DDB1_MOUSE  | 1.03718516 | 0.31974592 |
| DDC_MOUSE   | 0.94106925 | 0.25370814 |
| DDX1_MOUSE  | 1.02867098 | 0.73475988 |
| DDX3L_MOUSE | 0.96044118 | 0.35035191 |
| DDX6_MOUSE  | 0.84713051 | 0.02090482 |
| DECR_MOUSE  | 1.12356258 | 0.05415661 |
| DEMA_MOUSE  | 0.99371961 | 0.82245602 |
| DEST_MOUSE  | 0.96836695 | 0.46617128 |
| DGKB_MOUSE  | 1.03468591 | 0.71279534 |
| DHB11_MOUSE | 1.26549881 | 0.43127931 |
| DHB12_MOUSE | 1.10137074 | 0.13365641 |
| DHB4_MOUSE  | 1.04702299 | 0.34573986 |
| DHB8_MOUSE  | 1.00397809 | 0.88354124 |
| DHE3_MOUSE  | 1.08900467 | 0.18567775 |
| DHPR_MOUSE  | 1.02703101 | 0.97977501 |
| DHRS1_MOUSE | 1.26654408 | 0.00214101 |
| DHRS4_MOUSE | 1.12242795 | 0.02608375 |
| DHSO_MOUSE  | 0.91720589 | 0.18594359 |
| DIC_MOUSE   | 1.04545093 | 0.49344677 |
| DIP2A_MOUSE | 0.99926077 | 0.68799539 |
| DIP2B_MOUSE | 1.00294245 | 0.8818966  |
| DIRA2_MOUSE | 0.98643459 | 0.70449186 |
| DJC11_MOUSE | 1.03453362 | 0.61718016 |

|             |            |            |
|-------------|------------|------------|
| DLDH_MOUSE  | 0.99575126 | 0.78047943 |
| DLG1_MOUSE  | 0.9963699  | 0.68242344 |
| DLG2_MOUSE  | 0.95438399 | 0.34617645 |
| DLG3_MOUSE  | 0.99918288 | 0.6537367  |
| DLG4_MOUSE  | 0.97712365 | 0.51314291 |
| DLGP1_MOUSE | 0.87991575 | 0.01500004 |
| DLGP2_MOUSE | 0.96138788 | 0.21621455 |
| DLGP3_MOUSE | 0.96268039 | 0.23103275 |
| DLGP4_MOUSE | 0.94903038 | 0.07619281 |
| DLRB1_MOUSE | 0.94692853 | 0.34518253 |
| DMXL2_MOUSE | 0.9836664  | 0.55030164 |
| DNJA1_MOUSE | 1.0849886  | 0.23511034 |
| DNJA2_MOUSE | 1.01726057 | 0.99256824 |
| DNJA3_MOUSE | 0.98547798 | 0.58687236 |
| DNJC5_MOUSE | 0.8396206  | 0.01771918 |
| DNM1L_MOUSE | 0.99609404 | 0.75402022 |
| DNPEP_MOUSE | 0.98793225 | 0.68215435 |
| DOCK3_MOUSE | 1.82859663 | 0.46020798 |
| DOPD_MOUSE  | 0.99637672 | 0.89844903 |
| DP13A_MOUSE | 0.97109727 | 0.40096222 |
| DPP10_MOUSE | 1.00518735 | 0.92117178 |
| DPP3_MOUSE  | 0.82733183 | 0.01200881 |
| DPP6_MOUSE  | 0.99761789 | 0.77206678 |
| DPYL1_MOUSE | 1.05114335 | 0.66023886 |
| DPYL2_MOUSE | 0.96468052 | 0.45238635 |
| DPYL3_MOUSE | 0.92718025 | 0.09345604 |
| DPYL4_MOUSE | 0.93956619 | 0.16580306 |
| DPYL5_MOUSE | 1.02932723 | 0.43527973 |
| DREB_MOUSE  | 0.98338056 | 0.6081713  |
| DRG2_MOUSE  | 1.05655813 | 0.7342031  |
| DRS7B_MOUSE | 0.91558019 | 0.05046646 |
| DTNA_MOUSE  | 1.10998409 | 0.67179201 |
| DUS3_MOUSE  | 0.94153834 | 0.2262102  |
| DYHC1_MOUSE | 0.99996041 | 0.84369198 |
| DYL2_MOUSE  | 0.99610748 | 0.80791181 |
| DYN1_MOUSE  | 0.97528094 | 0.4249306  |
| DYN2_MOUSE  | 0.88939552 | 0.04723384 |
| DYN3_MOUSE  | 1.0115484  | 0.9810353  |
| DYST_MOUSE  | 1.00624913 | 0.65550488 |

|             |            |            |
|-------------|------------|------------|
| E41L1_MOUSE | 0.99050655 | 0.63297553 |
| E41L2_MOUSE | 1.04101442 | 0.40409144 |
| E41L3_MOUSE | 1.04682247 | 0.27021034 |
| EAA1_MOUSE  | 1.13709342 | 0.05145232 |
| EAA2_MOUSE  | 1.11686724 | 0.16111993 |
| ECH1_MOUSE  | 1.07770154 | 0.27514606 |
| ECHA_MOUSE  | 1.0736688  | 0.11715792 |
| ECHB_MOUSE  | 1.05260365 | 0.22163638 |
| ECHM_MOUSE  | 0.99901761 | 0.78677796 |
| ECI1_MOUSE  | 1.11886048 | 0.08396099 |
| ECI2_MOUSE  | 1.0349254  | 0.93652359 |
| EEA1_MOUSE  | 0.98202061 | 0.74602379 |
| EF1A1_MOUSE | 1.04052376 | 0.65534008 |
| EF1A2_MOUSE | 1.24083043 | 0.14898333 |
| EF1B_MOUSE  | 0.92366787 | 0.15514706 |
| EF1D_MOUSE  | 0.95404727 | 0.32038185 |
| EF1G_MOUSE  | 1.01892642 | 0.997511   |
| EF2_MOUSE   | 1.01448902 | 0.9026785  |
| EFGM_MOUSE  | 0.93074539 | 0.14217418 |
| EFHD2_MOUSE | 0.95021554 | 0.16893521 |
| EFR3B_MOUSE | 1.03110436 | 0.28523835 |
| EFTS_MOUSE  | 1.0346267  | 0.40961755 |
| EFTU_MOUSE  | 0.99893827 | 0.79130208 |
| EHD1_MOUSE  | 0.94490567 | 0.07504018 |
| EHD3_MOUSE  | 0.97369621 | 0.35187298 |
| EHD4_MOUSE  | 1.00516853 | 0.99944337 |
| EI3JA_MOUSE | 0.8001277  | 0.05996764 |
| EIF3A_MOUSE | 0.99040482 | 0.60801567 |
| ELMO2_MOUSE | 0.89811497 | 0.01129495 |
| ELOB_MOUSE  | 1.14898073 | 0.17528143 |
| ELOC_MOUSE  | 1.26510449 | 0.22061637 |
| EMC1_MOUSE  | 1.13960032 | 0.12573863 |
| ENAH_MOUSE  | 0.93990372 | 0.47147706 |
| ENDD1_MOUSE | 0.9772786  | 0.47484263 |
| ENOA_MOUSE  | 1.00683064 | 0.84549813 |
| ENOG_MOUSE  | 0.91257124 | 0.13439704 |
| ENPL_MOUSE  | 1.0451462  | 0.32731152 |
| ENPP6_MOUSE | 0.77429732 | 0.00174224 |
| ENSA_MOUSE  | 0.93155012 | 0.23966422 |

|             |            |            |
|-------------|------------|------------|
| ENTP2_MOUSE | 1.23727555 | 0.10957402 |
| EP15R_MOUSE | 0.93191318 | 0.13536493 |
| EPHA4_MOUSE | 0.93087299 | 0.18969246 |
| EPMIP_MOUSE | 1.34136797 | 0.03202506 |
| EPN1_MOUSE  | 0.89128225 | 0.02558887 |
| ERC2_MOUSE  | 0.91653563 | 0.05824564 |
| ERF1_MOUSE  | 0.89501746 | 0.01896492 |
| ERLN2_MOUSE | 1.09780132 | 0.04843022 |
| ERMIN_MOUSE | 0.70136735 | 0.0006461  |
| ERP29_MOUSE | 1.0100245  | 0.95273278 |
| ES1_MOUSE   | 1.0409925  | 0.44203393 |
| ESTD_MOUSE  | 1.03124716 | 0.62795788 |
| ETFA_MOUSE  | 1.0460668  | 0.43475353 |
| ETFB_MOUSE  | 1.03113387 | 0.38415183 |
| ETFD_MOUSE  | 1.04376991 | 0.43807702 |
| ETHE1_MOUSE | 0.97350823 | 0.41798135 |
| EXC6B_MOUSE | 0.9326987  | 0.25123265 |
| EXOC1_MOUSE | 0.95258354 | 0.30967313 |
| EXOC2_MOUSE | 1.07266349 | 0.08495018 |
| EXOC3_MOUSE | 1.03025299 | 0.59908017 |
| EXOC4_MOUSE | 1.05356086 | 0.40041786 |
| EXOC5_MOUSE | 0.90683323 | 0.17298168 |
| EXOC7_MOUSE | 1.00110641 | 0.84174034 |
| EXOC8_MOUSE | 0.95971674 | 0.5372182  |
| EXOG_MOUSE  | 1.10823534 | 0.2551025  |
| EZRI_MOUSE  | 1.13008439 | 0.00765815 |
| F10A1_MOUSE | 0.95167764 | 0.21988638 |
| F1142_MOUSE | 0.92751538 | 0.19115024 |
| F126B_MOUSE | 1.02347194 | 0.68135928 |
| F136A_MOUSE | 1.13011404 | 0.25662989 |
| F162A_MOUSE | 1.11419842 | 0.37186432 |
| F1712_MOUSE | 0.89734581 | 0.1516368  |
| F213A_MOUSE | 1.04187096 | 0.36204647 |
| FA49B_MOUSE | 0.94825525 | 0.29022506 |
| FA81A_MOUSE | 0.89641254 | 0.13158071 |
| FAAA_MOUSE  | 1.07930457 | 0.32457786 |
| FAAH1_MOUSE | 1.18543021 | 0.42186774 |
| FABP5_MOUSE | 1.06887186 | 0.32985143 |
| FABP7_MOUSE | 0.89541554 | 0.01497807 |

|             |            |            |
|-------------|------------|------------|
| FABPH_MOUSE | 0.97068313 | 0.38553989 |
| FAD1_MOUSE  | 0.95526062 | 0.55876374 |
| FAF2_MOUSE  | 1.11270418 | 0.4015437  |
| FAHD1_MOUSE | 1.04220832 | 0.75349186 |
| FAHD2_MOUSE | 1.00052738 | 0.82713292 |
| FAK1_MOUSE  | 0.90546026 | 0.03915314 |
| FAK2_MOUSE  | 0.86129274 | 0.01378658 |
| FARP1_MOUSE | 1.08695481 | 0.37927058 |
| FAS_MOUSE   | 1.00228816 | 0.9294778  |
| FBP1L_MOUSE | 1.25682396 | 0.39202978 |
| FBX2_MOUSE  | 0.89586835 | 0.05059159 |
| FBX41_MOUSE | 1.084194   | 0.08931452 |
| FERM2_MOUSE | 1.01558709 | 0.7528284  |
| FGF1_MOUSE  | 1.00311236 | 0.96833547 |
| FIS1_MOUSE  | 1.05631133 | 0.96275341 |
| FKB1A_MOUSE | 0.99037756 | 0.64307739 |
| FKBP2_MOUSE | 1.09562595 | 0.07091616 |
| FKBP4_MOUSE | 1.06555138 | 0.442951   |
| FKBP8_MOUSE | 1.0166283  | 0.83882213 |
| FLOT1_MOUSE | 1.0500364  | 0.2668803  |
| FLOT2_MOUSE | 1.03616288 | 0.15662698 |
| FNTA_MOUSE  | 1.25514043 | 0.10376756 |
| FPPS_MOUSE  | 0.97889044 | 0.52279687 |
| FRIH_MOUSE  | 0.98876314 | 0.65045371 |
| FRS1L_MOUSE | 0.94665898 | 0.29738819 |
| FSCN1_MOUSE | 1.00096874 | 0.85630928 |
| FSD1_MOUSE  | 1.08443745 | 0.32867667 |
| FUMH_MOUSE  | 1.02945542 | 0.69250377 |
| FUND2_MOUSE | 0.98019326 | 0.63108954 |
| FXL16_MOUSE | 0.95774399 | 0.36142269 |
| FXD6_MOUSE  | 1.00550852 | 0.56875657 |
| FYN_MOUSE   | 1.13212404 | 0.02046221 |
| G3P_MOUSE   | 1.00495118 | 0.91216678 |
| G6PD1_MOUSE | 0.99192471 | 0.8355243  |
| G6PI_MOUSE  | 1.01287995 | 0.98114521 |
| GABR1_MOUSE | 1.00921034 | 0.87709605 |
| GABR2_MOUSE | 1.19471926 | 0.09213734 |
| GABT_MOUSE  | 1.14023909 | 0.0939069  |
| GAK_MOUSE   | 1.01875869 | 0.91231741 |



|             |            |            |
|-------------|------------|------------|
| GANAB_MOUSE | 1.03330722 | 0.34374353 |
| GAS7_MOUSE  | 0.94527382 | 0.27295367 |
| GBB1_MOUSE  | 0.98883087 | 0.63395604 |
| GBB2_MOUSE  | 0.98445213 | 0.63578959 |
| GBG12_MOUSE | 1.21638441 | 0.13046898 |
| GBRA1_MOUSE | 1.03930183 | 0.51960803 |
| GBRA3_MOUSE | 1.05650769 | 0.54664987 |
| GBRB2_MOUSE | 1.00909209 | 0.65021137 |
| GBRG2_MOUSE | 1.03554937 | 0.60848859 |
| GCDH_MOUSE  | 1.04903765 | 0.15152767 |
| GCSP_MOUSE  | 1.00781441 | 0.90413185 |
| GCYB1_MOUSE | 0.9935508  | 0.76844967 |
| GD1L1_MOUSE | 1.01278793 | 0.96060401 |
| GDAP1_MOUSE | 1.05457175 | 0.52691484 |
| GDE1_MOUSE  | 1.06358373 | 0.86682562 |
| GDIA_MOUSE  | 0.95526691 | 0.35910827 |
| GDIB_MOUSE  | 0.97499466 | 0.50050969 |
| GDIR1_MOUSE | 0.9310952  | 0.10893807 |
| GDIR2_MOUSE | 1.0145506  | 0.98386481 |
| GDPD1_MOUSE | 0.99640758 | 0.6984245  |
| GELS_MOUSE  | 0.89959665 | 0.03404801 |
| GEPH_MOUSE  | 0.96420145 | 0.12394965 |
| GGT7_MOUSE  | 0.96157393 | 0.14200352 |
| GHC1_MOUSE  | 1.02600894 | 0.69470951 |
| GHC2_MOUSE  | 1.13098581 | 0.0148315  |
| GHITM_MOUSE | 1.01704093 | 0.82645665 |
| GIT1_MOUSE  | 0.97039765 | 0.47000531 |
| GLNA_MOUSE  | 1.02215468 | 0.90575509 |
| GLO2_MOUSE  | 1.04258018 | 0.74734337 |
| GLOD4_MOUSE | 1.00728895 | 0.91548343 |
| GLPK_MOUSE  | 0.99256418 | 0.62122889 |
| GLRX3_MOUSE | 1.01231348 | 0.87357842 |
| GLRX5_MOUSE | 1.00267135 | 0.69663536 |
| GLSK_MOUSE  | 0.9905067  | 0.6601556  |
| GLTP_MOUSE  | 0.80062921 | 0.00065311 |
| GLU2B_MOUSE | 0.95082672 | 0.58245884 |
| GMFB_MOUSE  | 1.01674218 | 0.47509811 |
| GNA11_MOUSE | 0.96719908 | 0.35009611 |
| GNA13_MOUSE | 1.02471894 | 0.7575927  |

|             |            |            |
|-------------|------------|------------|
| GNAI1_MOUSE | 0.93551604 | 0.20103305 |
| GNAI2_MOUSE | 0.99326702 | 0.64699244 |
| GNAL_MOUSE  | 0.91293456 | 0.23308404 |
| GNAO_MOUSE  | 1.0334088  | 0.73332862 |
| GNAQ_MOUSE  | 1.01520292 | 0.9240941  |
| GNAS1_MOUSE | 0.99259823 | 0.67681486 |
| GNAZ_MOUSE  | 0.98146205 | 0.56178768 |
| GNL1_MOUSE  | 1.01604335 | 0.9174514  |
| GP158_MOUSE | 0.97225362 | 0.33973596 |
| GPD1L_MOUSE | 0.98262733 | 0.4886019  |
| GPDA_MOUSE  | 0.95424183 | 0.2820429  |
| GPDM_MOUSE  | 1.02325067 | 0.59866467 |
| GPM6A_MOUSE | 1.04278309 | 0.65782388 |
| GPM6B_MOUSE | 0.93013583 | 0.20792359 |
| GPX1_MOUSE  | 1.14533197 | 0.42531989 |
| GPX41_MOUSE | 1.00030779 | 0.87783759 |
| GRAP1_MOUSE | 0.90511427 | 0.2555977  |
| GRB2_MOUSE  | 0.96697427 | 0.36363443 |
| GRHPR_MOUSE | 1.00215138 | 0.89001022 |
| GRIA1_MOUSE | 0.9917401  | 0.63537587 |
| GRIA2_MOUSE | 0.99801825 | 0.80235    |
| GRIA3_MOUSE | 1.03254364 | 0.47479562 |
| GRIA4_MOUSE | 0.91835384 | 0.15364045 |
| GRIK2_MOUSE | 1.01228953 | 0.99953405 |
| GRIN1_MOUSE | 0.96095874 | 0.40598644 |
| GRM2_MOUSE  | 0.98199966 | 0.53965784 |
| GRM3_MOUSE  | 1.01481414 | 0.95494592 |
| GRM5_MOUSE  | 0.98004857 | 0.73559814 |
| GRP75_MOUSE | 0.98695    | 0.57954    |
| GRP78_MOUSE | 0.99697679 | 0.75812564 |
| GRPE1_MOUSE | 0.96205474 | 0.41323019 |
| GSH1_MOUSE  | 0.96178101 | 0.43616771 |
| GSHB_MOUSE  | 0.85033172 | 0.02268042 |
| GSHR_MOUSE  | 1.02567347 | 0.7619371  |
| GSK3A_MOUSE | 0.96525689 | 0.35794847 |
| GSK3B_MOUSE | 0.98757273 | 0.52690272 |
| GSLG1_MOUSE | 0.95830048 | 0.73752093 |
| GSTA4_MOUSE | 1.02662765 | 0.75157663 |
| GSTK1_MOUSE | 1.16557025 | 0.01233682 |

|             |            |            |
|-------------|------------|------------|
| GSTM1_MOUSE | 1.15518006 | 0.08652935 |
| GSTM5_MOUSE | 0.95707989 | 0.08519237 |
| GSTM7_MOUSE | 1.03962189 | 0.97102673 |
| GSTO1_MOUSE | 0.97255265 | 0.40249991 |
| GSTP1_MOUSE | 1.01889342 | 0.97019997 |
| GTR1_MOUSE  | 1.03829364 | 0.70525455 |
| GTR3_MOUSE  | 0.97449832 | 0.4580693  |
| GUAA_MOUSE  | 0.98635927 | 0.54324771 |
| GUAD_MOUSE  | 0.9358393  | 0.0666416  |
| H2B1B_MOUSE | 1.80862575 | 0.09714643 |
| H4_MOUSE    | 1.41146582 | 0.21945612 |
| HACD3_MOUSE | 1.09368568 | 0.30131823 |
| HBA_MOUSE   | 0.9966499  | 0.74706481 |
| HBB1_MOUSE  | 0.96325363 | 0.57335766 |
| HCD2_MOUSE  | 1.0063288  | 0.93645434 |
| HCDH_MOUSE  | 1.12175114 | 0.31525542 |
| HCN1_MOUSE  | 0.94301013 | 0.48815647 |
| HCN2_MOUSE  | 1.15046562 | 0.18074168 |
| HD_MOUSE    | 0.91220661 | 0.12669536 |
| HDHD2_MOUSE | 1.16675473 | 0.14740017 |
| HDHD3_MOUSE | 1.19753055 | 0.08072622 |
| HEBP1_MOUSE | 0.82502717 | 0.01120527 |
| HECAM_MOUSE | 1.00378752 | 0.6768445  |
| HEM2_MOUSE  | 1.04526424 | 0.97466326 |
| HEM6_MOUSE  | 0.87976637 | 0.01536622 |
| HEMH_MOUSE  | 1.06645626 | 0.30082923 |
| HEXB_MOUSE  | 1.25357201 | 7.8042E-05 |
| HGS_MOUSE   | 0.94769661 | 0.40013508 |
| HIBCH_MOUSE | 1.0059509  | 0.90455214 |
| HINT1_MOUSE | 1.02699273 | 0.93559054 |
| HINT2_MOUSE | 1.13807736 | 0.17038312 |
| HIP1R_MOUSE | 1.07038403 | 0.03480123 |
| HMGCL_MOUSE | 1.0969999  | 0.18029747 |
| HMOX2_MOUSE | 1.01384104 | 0.98304365 |
| HNRPD_MOUSE | 1.00846097 | 0.84607034 |
| HNRPK_MOUSE | 0.91002648 | 0.0314375  |
| HNRPQ_MOUSE | 0.97713969 | 0.35580287 |
| HOME1_MOUSE | 0.92744494 | 0.02917598 |
| HOME2_MOUSE | 0.96944594 | 0.46724973 |

|             |            |            |
|-------------|------------|------------|
| HPCA_MOUSE  | 0.88978881 | 0.13213266 |
| HPCL1_MOUSE | 0.81808759 | 0.01486627 |
| HPCL4_MOUSE | 1.00947008 | 0.9821272  |
| HPLN1_MOUSE | 1.01779418 | 0.74266599 |
| HPRT_MOUSE  | 0.98731662 | 0.64991697 |
| HS105_MOUSE | 1.01309323 | 0.77386254 |
| HS12A_MOUSE | 1.00111196 | 0.80187899 |
| HS74L_MOUSE | 0.97532925 | 0.52169026 |
| HS90A_MOUSE | 1.0514396  | 0.77030603 |
| HS90B_MOUSE | 1.05436386 | 0.70537067 |
| HSDL1_MOUSE | 1.16066317 | 0.21571423 |
| HSDL2_MOUSE | 1.19055672 | 0.2311899  |
| HSP72_MOUSE | 0.89959424 | 0.02410683 |
| HSP74_MOUSE | 0.99306137 | 0.72726329 |
| HSP7C_MOUSE | 0.9805482  | 0.4997829  |
| HUWE1_MOUSE | 1.35876657 | 0.13870994 |
| HXK1_MOUSE  | 1.04056069 | 0.48317218 |
| HYEP_MOUSE  | 1.35368608 | 0.26282332 |
| HYES_MOUSE  | 1.1278738  | 0.11275112 |
| HYOU1_MOUSE | 1.04149257 | 0.33220653 |
| ICAM5_MOUSE | 1.15414603 | 0.18747463 |
| IDH3A_MOUSE | 1.03306397 | 0.79348352 |
| IDHC_MOUSE  | 0.98353491 | 0.532206   |
| IDHG1_MOUSE | 1.05339529 | 0.57543681 |
| IDHP_MOUSE  | 1.08284323 | 0.10659142 |
| IDI1_MOUSE  | 0.95106736 | 0.36793017 |
| IF2A_MOUSE  | 0.97077302 | 0.43973674 |
| IF2M_MOUSE  | 0.95094877 | 0.24604319 |
| IF4A1_MOUSE | 0.97879608 | 0.71371297 |
| IF4A2_MOUSE | 0.99653524 | 0.58493436 |
| IF4B_MOUSE  | 0.84114672 | 0.08381776 |
| IF4G2_MOUSE | 0.90824229 | 0.1655952  |
| IF4G3_MOUSE | 2.13082595 | 0.2253589  |
| IF4H_MOUSE  | 0.906618   | 0.01605254 |
| IF5A1_MOUSE | 1.07810511 | 0.46918629 |
| IGS21_MOUSE | 1.02254918 | 0.77797533 |
| IGSF8_MOUSE | 0.90445383 | 0.09063181 |
| ILDR2_MOUSE | 1.16725867 | 0.0204878  |
| ILEUA_MOUSE | 0.90670093 | 0.15485945 |

|             |            |            |
|-------------|------------|------------|
| IMA4_MOUSE  | 1.07562575 | 0.34381595 |
| IMB1_MOUSE  | 0.96736532 | 0.22525699 |
| IMPA1_MOUSE | 0.94045773 | 0.06342261 |
| INP4A_MOUSE | 1.19387803 | 0.15036698 |
| INPP_MOUSE  | 0.93495993 | 0.24798857 |
| IP3KA_MOUSE | 1.03272533 | 0.29738274 |
| IPO5_MOUSE  | 1.03547547 | 0.50682953 |
| IPO7_MOUSE  | 0.96886146 | 0.46091063 |
| IPO9_MOUSE  | 1.12071018 | 0.62653297 |
| IPYR_MOUSE  | 0.90182479 | 0.11972807 |
| IPYR2_MOUSE | 1.03919807 | 0.70320786 |
| IQEC1_MOUSE | 1.01964223 | 0.84060832 |
| IQEC2_MOUSE | 0.97027953 | 0.23230766 |
| IQEC3_MOUSE | 0.96746136 | 0.3646891  |
| ISC2A_MOUSE | 1.45600583 | 0.07998865 |
| ISCA1_MOUSE | 0.96274718 | 0.38011298 |
| ISCA2_MOUSE | 0.97379008 | 0.39297602 |
| ISCU_MOUSE  | 1.00502571 | 0.92568684 |
| ITAV_MOUSE  | 1.07288518 | 0.49259874 |
| ITPA_MOUSE  | 1.01960454 | 0.99858423 |
| ITPR1_MOUSE | 0.94623038 | 0.40546749 |
| ITSN1_MOUSE | 0.90674873 | 0.13140552 |
| IVD_MOUSE   | 1.01863486 | 0.58514458 |
| JAM3_MOUSE  | 0.82781692 | 0.00443631 |
| JIP3_MOUSE  | 0.98153519 | 0.47927761 |
| K0513_MOUSE | 0.92586537 | 0.05359384 |
| K1107_MOUSE | 0.98621988 | 0.41971006 |
| K1468_MOUSE | 0.94151881 | 0.21647293 |
| KAD1_MOUSE  | 0.90544477 | 0.05105984 |
| KAD3_MOUSE  | 1.07099764 | 0.07619417 |
| KAD4_MOUSE  | 1.09068021 | 0.29152758 |
| KAD5_MOUSE  | 0.88686762 | 0.21673854 |
| KALRN_MOUSE | 0.97906843 | 0.48625297 |
| KAP0_MOUSE  | 1.00790209 | 0.86173492 |
| KAP2_MOUSE  | 0.9940229  | 0.69684    |
| KAP3_MOUSE  | 1.05555251 | 0.30122207 |
| KAPCA_MOUSE | 0.98782347 | 0.676332   |
| KAPCB_MOUSE | 1.13611473 | 0.30706864 |
| KAT3_MOUSE  | 1.06803927 | 0.62888836 |

|             |            |            |
|-------------|------------|------------|
| KBTBB_MOUSE | 1.01297014 | 0.91865502 |
| KCAB2_MOUSE | 1.14419735 | 0.01641592 |
| KCC1D_MOUSE | 0.92286057 | 0.20861129 |
| KCC2A_MOUSE | 0.94621948 | 0.2878846  |
| KCC2B_MOUSE | 0.93683967 | 0.23063677 |
| KCC2D_MOUSE | 0.99126464 | 0.7451315  |
| KCC2G_MOUSE | 0.88936051 | 0.06989424 |
| KCC4_MOUSE  | 0.86225744 | 0.00240262 |
| KCD12_MOUSE | 0.89011137 | 0.09686777 |
| KCD16_MOUSE | 1.1265359  | 0.19257008 |
| KCJ10_MOUSE | 1.18909646 | 0.01845462 |
| KCMA1_MOUSE | 1.07136577 | 0.09498372 |
| KCNA1_MOUSE | 0.95670716 | 0.3306516  |
| KCNA6_MOUSE | 1.00342447 | 0.82905461 |
| KCNC3_MOUSE | 0.99013502 | 0.76865145 |
| KCND2_MOUSE | 0.96983282 | 0.59478545 |
| KCRB_MOUSE  | 0.95922771 | 0.24147638 |
| KCRU_MOUSE  | 0.98397    | 0.59662836 |
| KCY_MOUSE   | 0.96140981 | 0.20306035 |
| KI21A_MOUSE | 1.01049604 | 0.94805992 |
| KIF1A_MOUSE | 0.94575693 | 0.14319105 |
| KIF2A_MOUSE | 0.99218939 | 0.70145481 |
| KIF5C_MOUSE | 0.99174493 | 0.63416541 |
| KINH_MOUSE  | 0.98484243 | 0.59842804 |
| KKCC2_MOUSE | 0.89425397 | 0.05757814 |
| KLC1_MOUSE  | 0.922739   | 0.14459159 |
| KLC2_MOUSE  | 1.03582973 | 0.76964758 |
| KPCA_MOUSE  | 1.05799711 | 0.63840216 |
| KPCB_MOUSE  | 0.99422957 | 0.68465005 |
| KPCE_MOUSE  | 0.92950432 | 0.07828037 |
| KPCG_MOUSE  | 0.94592617 | 0.25412851 |
| KPRB_MOUSE  | 0.97140031 | 0.56822374 |
| KPYM_MOUSE  | 0.9950205  | 0.74245051 |
| KTN1_MOUSE  | 0.93140812 | 0.49453738 |
| L1CAM_MOUSE | 0.95412136 | 0.14742163 |
| L2GL1_MOUSE | 0.93869431 | 0.10888802 |
| L2HDH_MOUSE | 1.02902983 | 0.77627952 |
| LACTB_MOUSE | 0.99047184 | 0.75012811 |
| LAMP1_MOUSE | 1.40152611 | 0.00716468 |

|             |            |            |
|-------------|------------|------------|
| LAMP2_MOUSE | 1.26534597 | 0.03109832 |
| LANC1_MOUSE | 1.00586194 | 0.85129628 |
| LANC2_MOUSE | 0.96555558 | 0.37886485 |
| LASP1_MOUSE | 1.07232237 | 0.45671315 |
| LAT1_MOUSE  | 1.09288664 | 0.32592752 |
| LDHA_MOUSE  | 1.0037108  | 0.8738417  |
| LDHB_MOUSE  | 1.00644869 | 0.93920366 |
| LEGL_MOUSE  | 1.02286825 | 0.58196224 |
| LETM1_MOUSE | 0.96141347 | 0.28213711 |
| LGI1_MOUSE  | 1.01443788 | 0.88293982 |
| LGI3_MOUSE  | 0.98087268 | 0.64846702 |
| LGUL_MOUSE  | 0.88465545 | 0.02776196 |
| LIGO1_MOUSE | 0.92535483 | 0.0662017  |
| LIN7A_MOUSE | 1.04419579 | 0.60689541 |
| LIN7B_MOUSE | 1.01568644 | 0.97559783 |
| LIN7C_MOUSE | 0.95853856 | 0.35366281 |
| LIPA2_MOUSE | 1.02838839 | 0.9503486  |
| LIPA3_MOUSE | 0.9300342  | 0.18815451 |
| LIS1_MOUSE  | 0.9655425  | 0.35960492 |
| LKHA4_MOUSE | 1.03751804 | 0.73717574 |
| LNEBL_MOUSE | 0.98516024 | 0.66806    |
| LNP_MOUSE   | 0.91369094 | 0.1144901  |
| LONM_MOUSE  | 1.00933699 | 0.97320616 |
| LPPRC_MOUSE | 1.06369256 | 0.12686758 |
| LRC47_MOUSE | 0.93331977 | 0.21386983 |
| LRC4B_MOUSE | 0.94974307 | 0.25142476 |
| LRC57_MOUSE | 1.00165862 | 0.76285802 |
| LRC59_MOUSE | 0.92082264 | 0.27640336 |
| LRC8A_MOUSE | 1.04081756 | 0.74252674 |
| LRP1_MOUSE  | 1.05107247 | 0.26354775 |
| LRRC7_MOUSE | 0.94852172 | 0.21733151 |
| LRRT4_MOUSE | 0.93034258 | 0.12192532 |
| LSAMP_MOUSE | 1.0151648  | 0.95933566 |
| LXN_MOUSE   | 0.98544172 | 0.61593876 |
| LY6H_MOUSE  | 0.73551181 | 0.0012169  |
| LYAG_MOUSE  | 0.96022741 | 0.4989338  |
| LYPA2_MOUSE | 1.62648895 | 0.16854832 |
| M2OM_MOUSE  | 1.02219577 | 0.84290835 |
| MA2C1_MOUSE | 1.06035861 | 0.96505014 |

|             |            |            |
|-------------|------------|------------|
| MA7D2_MOUSE | 0.80489912 | 0.00460827 |
| MAAI_MOUSE  | 1.15831227 | 0.08578306 |
| MACF1_MOUSE | 0.94708023 | 0.32818398 |
| MADD_MOUSE  | 0.98573014 | 0.70255617 |
| MAG_MOUSE   | 0.86701761 | 0.03794073 |
| MAGI2_MOUSE | 0.98109207 | 0.53730691 |
| MAOM_MOUSE  | 1.01600988 | 0.86977351 |
| MAON_MOUSE  | 1.00489047 | 0.84958449 |
| MAOX_MOUSE  | 1.06690901 | 0.12073121 |
| MAP1A_MOUSE | 0.92195386 | 0.00325784 |
| MAP1B_MOUSE | 0.9432258  | 0.12478056 |
| MAP1S_MOUSE | 0.95264332 | 0.17528012 |
| MAP4_MOUSE  | 0.89066556 | 0.01688194 |
| MAP6_MOUSE  | 0.92475347 | 0.09264398 |
| MARC2_MOUSE | 1.11923826 | 0.03377912 |
| MARCS_MOUSE | 0.97101937 | 0.58943751 |
| MARE1_MOUSE | 1.04629156 | 0.30955014 |
| MARE2_MOUSE | 0.9926666  | 0.77606803 |
| MARE3_MOUSE | 0.98540773 | 0.58928631 |
| MARK2_MOUSE | 1.02383251 | 0.85802327 |
| MAT2B_MOUSE | 0.93985703 | 0.23022174 |
| MBLC2_MOUSE | 0.90343498 | 0.07978019 |
| MBP_MOUSE   | 0.92328741 | 0.4454055  |
| MCAT_MOUSE  | 1.04065071 | 0.47650239 |
| MCCA_MOUSE  | 1.02846836 | 0.77068371 |
| MCCB_MOUSE  | 1.07818015 | 0.362468   |
| MCTS1_MOUSE | 1.2107085  | 0.50599744 |
| MCU_MOUSE   | 1.0260794  | 0.66581334 |
| MDHC_MOUSE  | 0.97076836 | 0.37386438 |
| MDHM_MOUSE  | 1.00730397 | 0.96203795 |
| MECR_MOUSE  | 1.27092876 | 0.0299552  |
| METK2_MOUSE | 1.05221617 | 0.98342534 |
| MFF_MOUSE   | 1.1429367  | 0.08036632 |
| MFN2_MOUSE  | 1.01648063 | 0.95663788 |
| MFR1L_MOUSE | 0.94501509 | 0.19059654 |
| MGLL_MOUSE  | 1.08016729 | 0.50201274 |
| MGST3_MOUSE | 1.1904103  | 0.15188327 |
| MIA40_MOUSE | 0.99153095 | 0.74890825 |
| MIC13_MOUSE | 1.11846878 | 0.18306348 |



|             |            |            |
|-------------|------------|------------|
| MIC19_MOUSE | 0.99062762 | 0.62120066 |
| MIC25_MOUSE | 1.04625483 | 0.74891666 |
| MIC26_MOUSE | 1.02690877 | 0.89991855 |
| MIC27_MOUSE | 1.0358291  | 0.2455327  |
| MIC60_MOUSE | 0.96442481 | 0.33929642 |
| MICA3_MOUSE | 0.88265171 | 0.04276538 |
| MICU1_MOUSE | 0.96058267 | 0.37202076 |
| MICU3_MOUSE | 1.03362737 | 0.7407846  |
| MIF_MOUSE   | 1.01136338 | 0.8920451  |
| MINK1_MOUSE | 1.05338813 | 0.26692958 |
| MIRO1_MOUSE | 0.94261506 | 0.1258291  |
| MIRO2_MOUSE | 1.12920101 | 0.06287708 |
| MK01_MOUSE  | 1.01717077 | 0.83954249 |
| MK03_MOUSE  | 0.99686119 | 0.88195385 |
| ML12B_MOUSE | 0.90102778 | 0.07550757 |
| MLC1_MOUSE  | 1.08359027 | 0.75267065 |
| MLEC_MOUSE  | 1.00699818 | 0.8871345  |
| MMSA_MOUSE  | 1.07307357 | 0.14809918 |
| MOES_MOUSE  | 1.0951602  | 0.4149014  |
| MOG_MOUSE   | 0.81062557 | 0.04203528 |
| MOT1_MOUSE  | 1.11464269 | 0.75318346 |
| MP2K1_MOUSE | 0.98046129 | 0.58968413 |
| MP2K2_MOUSE | 0.9120673  | 0.03546896 |
| MP2K4_MOUSE | 1.02065888 | 0.92241121 |
| MPC2_MOUSE  | 1.32217013 | 0.00070535 |
| MPCP_MOUSE  | 1.06910064 | 0.12559273 |
| MPI_MOUSE   | 0.97964985 | 0.65587716 |
| MPP2_MOUSE  | 1.11963475 | 0.04303153 |
| MPP3_MOUSE  | 0.94265337 | 0.10859245 |
| MPP6_MOUSE  | 1.05433544 | 0.54897412 |
| MPPA_MOUSE  | 1.02924742 | 0.74045795 |
| MPPB_MOUSE  | 1.12859517 | 0.74639868 |
| MRCKB_MOUSE | 0.93370468 | 0.03820849 |
| MSRA_MOUSE  | 1.56066202 | 0.24394602 |
| MTAP2_MOUSE | 0.96096004 | 0.29523747 |
| MTCH1_MOUSE | 0.97208549 | 0.42474593 |
| MTCH2_MOUSE | 1.02016669 | 0.75168631 |
| MTEF2_MOUSE | 1.17645415 | 0.24683986 |
| MTMR1_MOUSE | 0.93901725 | 0.14697626 |

|             |            |            |
|-------------|------------|------------|
| MTMR2_MOUSE | 0.90768323 | 0.16139349 |
| MTMR5_MOUSE | 0.97853735 | 0.46341999 |
| MTOR_MOUSE  | 1.03595867 | 0.8085487  |
| MTPN_MOUSE  | 0.95693534 | 0.2902891  |
| MTX1_MOUSE  | 1.00711524 | 0.79443812 |
| MTX2_MOUSE  | 1.03237818 | 0.64176554 |
| MUTA_MOUSE  | 1.00531712 | 0.95113874 |
| MY18A_MOUSE | 1.02635245 | 0.86903555 |
| MYCT_MOUSE  | 0.95986112 | 0.49220702 |
| MYH10_MOUSE | 0.9592996  | 0.36358753 |
| MYH14_MOUSE | 0.9453957  | 0.30542759 |
| MYH9_MOUSE  | 0.92656046 | 0.30806453 |
| MYL6_MOUSE  | 0.90022221 | 0.04429835 |
| MYO1D_MOUSE | 0.87790012 | 0.13191371 |
| MYO5A_MOUSE | 0.99772778 | 0.83136478 |
| MYO6_MOUSE  | 0.92565205 | 0.16830803 |
| MYPR_MOUSE  | 0.89549461 | 0.05094985 |
| NAC1_MOUSE  | 1.06939221 | 0.26206924 |
| NAC2_MOUSE  | 1.00869748 | 0.96067254 |
| NACA_MOUSE  | 0.86900417 | 0.02119228 |
| NAGAB_MOUSE | 0.85394623 | 0.02971335 |
| NAGK_MOUSE  | 1.10209212 | 0.68275629 |
| NAKD2_MOUSE | 1.03332278 | 0.30706702 |
| NAMPT_MOUSE | 1.11718972 | 0.43285243 |
| NB5R1_MOUSE | 1.09370359 | 0.24967383 |
| NB5R3_MOUSE | 1.0399061  | 0.25344097 |
| NBEA_MOUSE  | 1.02745106 | 0.73967195 |
| NCALD_MOUSE | 0.8888428  | 0.05941141 |
| NCAM1_MOUSE | 1.00922019 | 0.93701912 |
| NCAM2_MOUSE | 1.06230671 | 0.06651004 |
| NCAN_MOUSE  | 0.92976484 | 0.26067608 |
| NCDN_MOUSE  | 0.97663871 | 0.29288803 |
| NCEH1_MOUSE | 1.01867947 | 0.63870012 |
| NCKP1_MOUSE | 1.02066555 | 0.68898707 |
| NCPR_MOUSE  | 1.04230958 | 0.55276667 |
| NCS1_MOUSE  | 1.02989954 | 0.90692259 |
| NDKA_MOUSE  | 1.058308   | 0.16941974 |
| NDKB_MOUSE  | 1.12502218 | 0.40143463 |
| NDRG1_MOUSE | 0.94785859 | 0.442828   |

|             |            |            |
|-------------|------------|------------|
| NDRG2_MOUSE | 0.99018196 | 0.64431898 |
| NDRG3_MOUSE | 0.89548669 | 0.08100714 |
| NDRG4_MOUSE | 0.95069216 | 0.27890409 |
| NDUA1_MOUSE | 1.0132651  | 0.88219742 |
| NDUA2_MOUSE | 1.03051931 | 0.95158121 |
| NDUA4_MOUSE | 1.14503956 | 0.00412785 |
| NDUA5_MOUSE | 1.12733723 | 0.27634888 |
| NDUA6_MOUSE | 1.08844412 | 0.17983409 |
| NDUA7_MOUSE | 0.98251045 | 0.64620272 |
| NDUA8_MOUSE | 1.07774647 | 0.28945013 |
| NDUA9_MOUSE | 1.15779457 | 0.16088299 |
| NDUAA_MOUSE | 1.06895499 | 0.30846433 |
| NDUAB_MOUSE | 1.12938014 | 0.12287275 |
| NDUAC_MOUSE | 1.0793315  | 0.25434492 |
| NDUAD_MOUSE | 1.0688768  | 0.20339444 |
| NDUB1_MOUSE | 1.12926102 | 0.13593936 |
| NDUB3_MOUSE | 1.08217393 | 0.29072781 |
| NDUB4_MOUSE | 1.07374921 | 0.379376   |
| NDUB5_MOUSE | 0.97754016 | 0.48708157 |
| NDUB6_MOUSE | 1.06170335 | 0.45320348 |
| NDUB7_MOUSE | 1.10087822 | 0.22268906 |
| NDUB8_MOUSE | 0.91689878 | 0.03792883 |
| NDUB9_MOUSE | 1.31423046 | 0.17222648 |
| NDUBA_MOUSE | 0.98479154 | 0.55529063 |
| NDUBB_MOUSE | 1.00731954 | 0.95369061 |
| NDUC2_MOUSE | 1.06758252 | 0.44422729 |
| NDUF3_MOUSE | 1.07974234 | 0.42007626 |
| NDUS1_MOUSE | 0.96650326 | 0.28283496 |
| NDUS2_MOUSE | 1.0630756  | 0.73636905 |
| NDUS3_MOUSE | 1.02627792 | 0.83733642 |
| NDUS4_MOUSE | 1.00218457 | 0.89041652 |
| NDUS5_MOUSE | 1.01526487 | 0.88259846 |
| NDUS6_MOUSE | 1.06807777 | 0.51588702 |
| NDUS7_MOUSE | 1.09640032 | 0.3709634  |
| NDUS8_MOUSE | 0.99676192 | 0.76320379 |
| NDUV1_MOUSE | 1.07947914 | 0.33487841 |
| NDUV2_MOUSE | 0.99474737 | 0.68649134 |
| NEB2_MOUSE  | 0.93550828 | 0.21287939 |
| NECA2_MOUSE | 0.87940408 | 0.03012099 |

|             |            |            |
|-------------|------------|------------|
| NECP1_MOUSE | 0.95406575 | 0.21445126 |
| NEDD4_MOUSE | 0.84642226 | 0.12338064 |
| NEGR1_MOUSE | 0.94515288 | 0.1781445  |
| NEO1_MOUSE  | 0.97520147 | 0.69255203 |
| NEUL_MOUSE  | 0.91627141 | 0.05404982 |
| NEUM_MOUSE  | 0.95603322 | 0.32362414 |
| NF1_MOUSE   | 0.95071121 | 0.10359784 |
| NFASC_MOUSE | 1.02754702 | 0.74451862 |
| NFL_MOUSE   | 1.20207472 | 0.0390092  |
| NFM_MOUSE   | 1.20289993 | 0.05015881 |
| NFS1_MOUSE  | 1.05719788 | 0.62294388 |
| NFU1_MOUSE  | 0.89839858 | 0.06465322 |
| NGEF_MOUSE  | 1.02519579 | 0.4896533  |
| NHRF1_MOUSE | 1.04269501 | 0.72023942 |
| NICA_MOUSE  | 1.04294497 | 0.39422951 |
| NIF3L_MOUSE | 1.09041936 | 0.18156027 |
| NIPS1_MOUSE | 1.06533237 | 0.51417049 |
| NIPS2_MOUSE | 1.04139721 | 0.69284516 |
| NIT1_MOUSE  | 1.10078875 | 0.23534919 |
| NIT2_MOUSE  | 1.13577144 | 0.16474237 |
| NLGN3_MOUSE | 1.05900744 | 0.17582176 |
| NLTP_MOUSE  | 1.06173948 | 0.1235345  |
| NMDE1_MOUSE | 0.97037595 | 0.38307683 |
| NMDE2_MOUSE | 0.95183862 | 0.33109324 |
| NMDZ1_MOUSE | 0.95947969 | 0.27012383 |
| NMT2_MOUSE  | 1.06267801 | 0.901335   |
| NNRD_MOUSE  | 0.98494453 | 0.5806195  |
| NNRE_MOUSE  | 1.00790381 | 0.88367596 |
| NNTM_MOUSE  | 6.67564333 | 0.05216051 |
| NOE1_MOUSE  | 0.92599746 | 0.06978157 |
| NOMO1_MOUSE | 0.97066183 | 0.46179249 |
| NP1L1_MOUSE | 0.88747556 | 0.02188194 |
| NP1L4_MOUSE | 0.85882754 | 0.01284868 |
| NPL4_MOUSE  | 0.97171711 | 0.62481358 |
| NPS3B_MOUSE | 1.13234199 | 0.11440893 |
| NPTN_MOUSE  | 1.03143162 | 0.66149391 |
| NPTX1_MOUSE | 0.90833515 | 0.01447777 |
| NPTXR_MOUSE | 0.88738283 | 0.07150321 |
| NRCAM_MOUSE | 1.14839269 | 0.31441831 |

|             |            |            |
|-------------|------------|------------|
| NRX1A_MOUSE | 1.01682435 | 0.94817938 |
| NRX3A_MOUSE | 1.00566944 | 0.95306512 |
| NSF_MOUSE   | 0.99322478 | 0.65001745 |
| NSF1C_MOUSE | 0.95379788 | 0.26623312 |
| NT5D3_MOUSE | 1.05916555 | 0.21744058 |
| NTF2_MOUSE  | 1.1785295  | 0.05905976 |
| NTRI_MOUSE  | 0.98825748 | 0.57368287 |
| NTRK2_MOUSE | 1.09437487 | 0.3594508  |
| NU1M_MOUSE  | 1.15263395 | 0.39224592 |
| NU5M_MOUSE  | 1.16804406 | 0.24218301 |
| NUCG_MOUSE  | 0.98424953 | 0.65962729 |
| NUDC_MOUSE  | 1.2086636  | 0.00217095 |
| NUDT3_MOUSE | 0.92530622 | 0.06406152 |
| OAT_MOUSE   | 1.12313648 | 0.24280878 |
| OCAD1_MOUSE | 0.92184018 | 0.08040909 |
| ODB2_MOUSE  | 1.1042464  | 0.07019949 |
| ODBA_MOUSE  | 0.99953326 | 0.83828165 |
| ODBB_MOUSE  | 1.00248265 | 0.63956314 |
| ODO1_MOUSE  | 1.02134296 | 0.86854725 |
| ODO2_MOUSE  | 0.94457978 | 0.09527402 |
| ODP2_MOUSE  | 0.96444011 | 0.20698769 |
| ODPA_MOUSE  | 1.0249564  | 0.66129171 |
| ODPB_MOUSE  | 0.99904408 | 0.76815612 |
| ODPX_MOUSE  | 0.95428042 | 0.03605176 |
| OGA_MOUSE   | 1.05758816 | 0.37620006 |
| OGT1_MOUSE  | 0.99876822 | 0.84780331 |
| OLA1_MOUSE  | 1.10552791 | 0.2503684  |
| OMGP_MOUSE  | 0.94813176 | 0.40692267 |
| OMP_MOUSE   | 0.75077186 | 0.07260789 |
| OPA1_MOUSE  | 0.97592061 | 0.32270261 |
| OSB10_MOUSE | 0.98453597 | 0.68213975 |
| OSBL1_MOUSE | 1.02333705 | 0.89751222 |
| OSBL8_MOUSE | 0.99106234 | 0.65315863 |
| OSCP1_MOUSE | 1.05345987 | 0.61866299 |
| OST48_MOUSE | 1.01504547 | 0.97785333 |
| OTUB1_MOUSE | 0.95155946 | 0.36339172 |
| OX2G_MOUSE  | 1.04870317 | 0.55787902 |
| OXR1_MOUSE  | 0.96822046 | 0.37130483 |
| OXSR1_MOUSE | 0.90056682 | 0.10668183 |

|             |            |            |
|-------------|------------|------------|
| P5CR2_MOUSE | 1.02113577 | 0.86756015 |
| P5CS_MOUSE  | 0.95373377 | 0.2186305  |
| PA1B2_MOUSE | 1.02100765 | 0.79967824 |
| PA2G4_MOUSE | 0.94860807 | 0.05160568 |
| PABP1_MOUSE | 0.95953523 | 0.19427743 |
| PACN1_MOUSE | 0.85681121 | 0.03486825 |
| PACN2_MOUSE | 0.9578468  | 0.46600372 |
| PACS1_MOUSE | 0.97262035 | 0.30162945 |
| PACS2_MOUSE | 1.0461893  | 0.91913398 |
| PADI2_MOUSE | 0.9481439  | 0.45997087 |
| PAK1_MOUSE  | 0.94763079 | 0.25417587 |
| PALM_MOUSE  | 0.93079139 | 0.2173068  |
| PALM2_MOUSE | 1.10413941 | 0.88475218 |
| PARK7_MOUSE | 0.95404056 | 0.18930165 |
| PCBP1_MOUSE | 1.00713177 | 0.95802775 |
| PCBP2_MOUSE | 0.93977297 | 0.08755091 |
| PCCA_MOUSE  | 0.95424421 | 0.20346456 |
| PCCB_MOUSE  | 1.00090596 | 0.81193898 |
| PCKGM_MOUSE | 0.95715302 | 0.25383051 |
| PCLO_MOUSE  | 1.01693286 | 0.94870891 |
| PCSK1_MOUSE | 0.91762521 | 0.21548108 |
| PCY2_MOUSE  | 0.96174223 | 0.37457413 |
| PCYOX_MOUSE | 1.15507254 | 0.17640501 |
| PDC6I_MOUSE | 0.95421676 | 0.24845789 |
| PDCD5_MOUSE | 0.76320979 | 0.00275629 |
| PDCD6_MOUSE | 0.97101167 | 0.36312258 |
| PDE10_MOUSE | 1.11043813 | 0.08992869 |
| PDE1A_MOUSE | 0.89786772 | 0.04629677 |
| PDE1B_MOUSE | 1.00526591 | 0.93548675 |
| PDE2A_MOUSE | 1.04812793 | 0.33920883 |
| PDIA1_MOUSE | 1.00575048 | 0.94270369 |
| PDIA3_MOUSE | 0.9756158  | 0.57172246 |
| PDIA4_MOUSE | 0.95474027 | 0.28739388 |
| PDIA6_MOUSE | 0.99920898 | 0.83359917 |
| PDIP2_MOUSE | 0.9673986  | 0.44706677 |
| PDK1_MOUSE  | 0.93729388 | 0.14992757 |
| PDK2_MOUSE  | 0.93077913 | 0.27097819 |
| PDK3_MOUSE  | 0.93361175 | 0.15337018 |
| PDP1_MOUSE  | 1.06257359 | 0.28100377 |

|             |            |            |
|-------------|------------|------------|
| PDPR_MOUSE  | 1.00762373 | 0.96004196 |
| PDXK_MOUSE  | 1.10611712 | 0.36480152 |
| PEA15_MOUSE | 1.36824969 | 0.61901669 |
| PEBP1_MOUSE | 0.93651747 | 0.0171186  |
| PEX5R_MOUSE | 0.97945021 | 0.47805376 |
| PFD3_MOUSE  | 1.02434824 | 0.92730139 |
| PFD5_MOUSE  | 0.96707755 | 0.3138578  |
| PFD6_MOUSE  | 0.96528723 | 0.36871092 |
| PFKAL_MOUSE | 1.05272213 | 0.32877523 |
| PFKAM_MOUSE | 0.98169945 | 0.58441908 |
| PFKAP_MOUSE | 1.02725679 | 0.61691882 |
| PGAM1_MOUSE | 0.99935061 | 0.81874243 |
| PGAM5_MOUSE | 0.92499511 | 0.03368299 |
| PGCB_MOUSE  | 1.13612543 | 0.30486573 |
| PGES2_MOUSE | 0.96041077 | 0.45285622 |
| PGFS_MOUSE  | 1.06252775 | 0.18184908 |
| PGK1_MOUSE  | 1.03335994 | 0.65176088 |
| PGM1_MOUSE  | 1.0370261  | 0.64439547 |
| PGM2L_MOUSE | 0.94145415 | 0.07355529 |
| PGP_MOUSE   | 0.93352441 | 0.06661916 |
| PGPS1_MOUSE | 1.05431775 | 0.45114758 |
| PGRC1_MOUSE | 0.96979417 | 0.50456131 |
| PGRC2_MOUSE | 0.89370458 | 0.06610713 |
| PGTA_MOUSE  | 1.02648338 | 0.77741789 |
| PHAR1_MOUSE | 0.93084472 | 0.05922947 |
| PHB_MOUSE   | 0.9865244  | 0.48785354 |
| PHB2_MOUSE  | 1.06724223 | 0.33035951 |
| PHF24_MOUSE | 1.07333765 | 0.56219408 |
| PHIPL_MOUSE | 0.95514206 | 0.23890019 |
| PHP14_MOUSE | 0.9886719  | 0.595984   |
| PHYIP_MOUSE | 0.96376064 | 0.4341621  |
| PI3R4_MOUSE | 0.89167808 | 0.02270654 |
| PI42A_MOUSE | 0.94273072 | 0.10806918 |
| PI42B_MOUSE | 0.97617478 | 0.48190734 |
| PI42C_MOUSE | 1.00358304 | 0.80108792 |
| PI4KA_MOUSE | 1.05584289 | 0.3535877  |
| PI51C_MOUSE | 0.96523372 | 0.50100504 |
| PICAL_MOUSE | 0.96834221 | 0.38879483 |
| PIMT_MOUSE  | 0.92375817 | 0.08782141 |

|             |            |            |
|-------------|------------|------------|
| PIN1_MOUSE  | 1.06597268 | 0.44592309 |
| PIPNA_MOUSE | 0.98535021 | 0.61805095 |
| PIPNB_MOUSE | 1.02701707 | 0.88147985 |
| PITM1_MOUSE | 0.94288814 | 0.16538686 |
| PK3C3_MOUSE | 1.04634065 | 0.73536577 |
| PKP4_MOUSE  | 1.03996398 | 0.57660734 |
| PLAP_MOUSE  | 0.9774675  | 0.57516115 |
| PLBL2_MOUSE | 0.84508706 | 0.01699015 |
| PLCB1_MOUSE | 1.00613749 | 0.77020676 |
| PLCG1_MOUSE | 1.29537503 | 0.08387851 |
| PLCX3_MOUSE | 1.14424476 | 0.12723393 |
| PLD3_MOUSE  | 0.97168916 | 0.48260632 |
| PLEC_MOUSE  | 1.07899567 | 0.2027478  |
| PLPL8_MOUSE | 1.05821826 | 0.20074931 |
| PLPP_MOUSE  | 1.04769601 | 0.42258384 |
| PLPP3_MOUSE | 1.15348835 | 0.03520309 |
| PLPR4_MOUSE | 0.98114661 | 0.61911718 |
| PLRKT_MOUSE | 0.99214784 | 0.75749344 |
| PLSL_MOUSE  | 0.92644802 | 0.13896414 |
| PLST_MOUSE  | 0.97279865 | 0.46286432 |
| PLXA1_MOUSE | 1.02748703 | 0.5906007  |
| PLXA4_MOUSE | 1.00085776 | 0.94848269 |
| PLXB2_MOUSE | 1.17344504 | 0.33905113 |
| PMM1_MOUSE  | 0.93177184 | 0.31012612 |
| PNPH_MOUSE  | 0.98586192 | 0.71419673 |
| PNPT1_MOUSE | 0.96942518 | 0.43589907 |
| PP1A_MOUSE  | 1.0420291  | 0.44524157 |
| PP1R7_MOUSE | 0.9492785  | 0.23359999 |
| PP2AA_MOUSE | 0.98023118 | 0.57012664 |
| PP2BA_MOUSE | 0.95650745 | 0.1996156  |
| PP2BB_MOUSE | 0.92236217 | 0.06922296 |
| PPAC_MOUSE  | 0.89862769 | 0.08841646 |
| PPCE_MOUSE  | 0.88941128 | 0.11350971 |
| PPCEL_MOUSE | 0.91241081 | 0.20774792 |
| PPGB_MOUSE  | 0.99277351 | 0.73645119 |
| PPIA_MOUSE  | 0.9050587  | 0.01508338 |
| PIIB_MOUSE  | 1.00714709 | 0.9466152  |
| PPID_MOUSE  | 1.01164918 | 0.71325911 |
| PPM1A_MOUSE | 1.05648944 | 0.86269732 |



|             |            |            |
|-------------|------------|------------|
| PPM1H_MOUSE | 1.04288989 | 0.74915372 |
| PPME1_MOUSE | 0.94068711 | 0.10783277 |
| PPP5_MOUSE  | 0.98668627 | 0.6034343  |
| PPR21_MOUSE | 0.91015258 | 0.24976518 |
| PPR29_MOUSE | 0.95123548 | 0.15439529 |
| PPTC7_MOUSE | 0.99441218 | 0.69922397 |
| PRAF3_MOUSE | 1.22893042 | 0.00097627 |
| PRDX1_MOUSE | 0.99648674 | 0.7490284  |
| PRDX2_MOUSE | 1.0048277  | 0.94308113 |
| PRDX3_MOUSE | 1.04002467 | 0.68350605 |
| PRDX5_MOUSE | 0.99238561 | 0.64325564 |
| PRDX6_MOUSE | 1.06887752 | 0.07476094 |
| PREB_MOUSE  | 1.0305386  | 0.76752477 |
| PREP_MOUSE  | 1.00554792 | 0.96084984 |
| PREX1_MOUSE | 1.07314831 | 0.27822383 |
| PRIO_MOUSE  | 1.2152459  | 0.31692789 |
| PROD_MOUSE  | 1.33184912 | 0.00683403 |
| PROF1_MOUSE | 0.99089886 | 0.68098301 |
| PROF2_MOUSE | 0.97319225 | 0.32864379 |
| PRPS1_MOUSE | 1.19313586 | 0.23268953 |
| PRPTZ_MOUSE | 0.94046504 | 0.32248869 |
| PRRT2_MOUSE | 0.93747582 | 0.10437303 |
| PRRT3_MOUSE | 0.98371067 | 0.59608915 |
| PRS10_MOUSE | 0.93512359 | 0.29038965 |
| PRS4_MOUSE  | 1.02088613 | 0.85935263 |
| PRS6A_MOUSE | 0.91731684 | 0.17566909 |
| PRS6B_MOUSE | 1.00362165 | 0.86879271 |
| PRS7_MOUSE  | 1.0002942  | 0.78615279 |
| PRS8_MOUSE  | 1.02220178 | 0.75874328 |
| PSA_MOUSE   | 1.00303462 | 0.89270577 |
| PSA1_MOUSE  | 1.02998195 | 0.69003613 |
| PSA2_MOUSE  | 1.08071953 | 0.61203594 |
| PSA3_MOUSE  | 1.03955006 | 0.41789878 |
| PSA4_MOUSE  | 0.97312791 | 0.42161853 |
| PSA5_MOUSE  | 1.02069557 | 0.43074498 |
| PSA6_MOUSE  | 0.97606106 | 0.35994854 |
| PSA7_MOUSE  | 0.95031584 | 0.30712505 |
| PSB1_MOUSE  | 0.97220788 | 0.53312792 |
| PSB2_MOUSE  | 1.02259758 | 0.70455866 |

|             |            |            |
|-------------|------------|------------|
| PSB3_MOUSE  | 1.03650417 | 0.60703967 |
| PSB4_MOUSE  | 1.09031281 | 0.3767386  |
| PSB5_MOUSE  | 1.06300824 | 0.54682094 |
| PSB7_MOUSE  | 1.14197811 | 0.2033687  |
| PSD11_MOUSE | 0.98031312 | 0.55340841 |
| PSD12_MOUSE | 0.95514434 | 0.41985889 |
| PSD13_MOUSE | 1.02813493 | 0.65293081 |
| PSD3_MOUSE  | 0.96496766 | 0.20095554 |
| PSMD1_MOUSE | 1.016873   | 0.79713294 |
| PSMD2_MOUSE | 1.00111208 | 0.88348815 |
| PSMD3_MOUSE | 1.02822311 | 0.36964501 |
| PSMD4_MOUSE | 0.90764278 | 0.09602632 |
| PSMD5_MOUSE | 1.09648268 | 0.71265602 |
| PSMD6_MOUSE | 1.10318572 | 0.03722242 |
| PSMD8_MOUSE | 0.96818102 | 0.56338811 |
| PSMD9_MOUSE | 1.00634363 | 0.87850663 |
| PSME1_MOUSE | 0.85349389 | 0.02720591 |
| PTCD3_MOUSE | 0.92077942 | 0.07914372 |
| PTGR3_MOUSE | 0.98930205 | 0.77100447 |
| PTH2_MOUSE  | 1.40128853 | 0.03860765 |
| PTN11_MOUSE | 1.11394948 | 0.35950536 |
| PTN5_MOUSE  | 1.02792282 | 0.75957576 |
| PTPA_MOUSE  | 0.91739892 | 0.01995569 |
| PTPR2_MOUSE | 1.05497927 | 0.21468762 |
| PTPRA_MOUSE | 0.95736181 | 0.36575842 |
| PTPRD_MOUSE | 1.00970418 | 0.98280693 |
| PTPRS_MOUSE | 0.97560704 | 0.46096821 |
| PUR6_MOUSE  | 0.96800801 | 0.44984594 |
| PUR9_MOUSE  | 1.04132235 | 0.84339459 |
| PURA_MOUSE  | 0.9363025  | 0.20114416 |
| PURB_MOUSE  | 1.05287647 | 0.71801766 |
| PYC_MOUSE   | 1.08013427 | 0.13587142 |
| PYGB_MOUSE  | 1.08392465 | 0.01500789 |
| PYGM_MOUSE  | 1.112087   | 0.02193498 |
| QCR1_MOUSE  | 1.01169733 | 0.98801884 |
| QCR2_MOUSE  | 0.98791128 | 0.61404823 |
| QCR7_MOUSE  | 0.95733574 | 0.25947284 |
| QCR8_MOUSE  | 1.09664253 | 0.65418238 |
| QCR9_MOUSE  | 1.15712494 | 0.12183419 |

|             |            |            |
|-------------|------------|------------|
| QORL2_MOUSE | 1.44243371 | 0.1082091  |
| RAB10_MOUSE | 1.20621044 | 0.09095565 |
| RAB12_MOUSE | 1.08023048 | 0.04125747 |
| RAB14_MOUSE | 0.99635397 | 0.79720283 |
| RAB18_MOUSE | 1.00468172 | 0.70458126 |
| RAB1A_MOUSE | 0.90731352 | 0.06284606 |
| RAB1B_MOUSE | 0.95186358 | 0.18105308 |
| RAB21_MOUSE | 1.07540456 | 0.5658942  |
| RAB23_MOUSE | 1.01080441 | 0.91200033 |
| RAB2A_MOUSE | 0.98936085 | 0.59449412 |
| RAB35_MOUSE | 0.99362191 | 0.77694908 |
| RAB3A_MOUSE | 0.97120894 | 0.49888111 |
| RAB3B_MOUSE | 1.07653686 | 0.68951256 |
| RAB3C_MOUSE | 1.0447865  | 0.98895973 |
| RAB4B_MOUSE | 0.97944705 | 0.57335125 |
| RAB5A_MOUSE | 1.08860547 | 0.27483661 |
| RAB5B_MOUSE | 0.94031537 | 0.1614421  |
| RAB5C_MOUSE | 1.01405013 | 0.83503063 |
| RAB6A_MOUSE | 0.97803469 | 0.57123781 |
| RAB6B_MOUSE | 0.96473644 | 0.38382059 |
| RAB7A_MOUSE | 1.00676915 | 0.83160283 |
| RAB8A_MOUSE | 1.67570226 | 0.06205517 |
| RABE1_MOUSE | 0.85418023 | 0.05176806 |
| RABL6_MOUSE | 0.94818092 | 0.42021216 |
| RAC1_MOUSE  | 1.0583443  | 0.83299825 |
| RACK1_MOUSE | 0.97590529 | 0.59709999 |
| RADI_MOUSE  | 1.01189008 | 0.87431125 |
| RALA_MOUSE  | 1.08575762 | 0.46861418 |
| RAN_MOUSE   | 0.98695635 | 0.5309179  |
| RANG_MOUSE  | 0.88422938 | 0.05793791 |
| RAP2A_MOUSE | 1.03196459 | 0.66591793 |
| RAP2B_MOUSE | 0.97326508 | 0.45540521 |
| RASH_MOUSE  | 0.95613379 | 0.38487808 |
| RASL1_MOUSE | 0.99970923 | 0.89218374 |
| RASM_MOUSE  | 1.10863888 | 0.14557324 |
| RB11B_MOUSE | 1.04332353 | 0.32837907 |
| RB39B_MOUSE | 0.99731684 | 0.7510797  |
| RB6I2_MOUSE | 0.92540326 | 0.11513112 |
| RBBP9_MOUSE | 1.05063415 | 0.73727939 |

|             |            |            |
|-------------|------------|------------|
| RBGPR_MOUSE | 0.95931623 | 0.28753297 |
| RCN2_MOUSE  | 0.86323993 | 0.19989303 |
| RD23B_MOUSE | 1.03184009 | 0.88407089 |
| RDH14_MOUSE | 1.01932945 | 0.81068441 |
| RENT1_MOUSE | 1.13651544 | 0.32414873 |
| RFIP2_MOUSE | 0.97744292 | 0.53541153 |
| RFIP5_MOUSE | 0.82827197 | 0.004972   |
| RFTN2_MOUSE | 1.18123722 | 0.47660201 |
| RGRF2_MOUSE | 0.95621213 | 0.45574269 |
| RGS7_MOUSE  | 1.06613564 | 0.45796778 |
| RHG01_MOUSE | 1.00414306 | 0.97513123 |
| RHG32_MOUSE | 0.99949117 | 0.83417063 |
| RHG35_MOUSE | 1.12397969 | 0.1681792  |
| RHG44_MOUSE | 0.99536762 | 0.74758901 |
| RHOA_MOUSE  | 1.17126322 | 0.02563162 |
| RHOB_MOUSE  | 1.13512493 | 0.03238656 |
| RHOG_MOUSE  | 0.93688861 | 0.36250404 |
| RIMB2_MOUSE | 0.91544582 | 0.01857911 |
| RIMS1_MOUSE | 0.99564106 | 0.80008711 |
| RINI_MOUSE  | 0.95266173 | 0.42019188 |
| RL10_MOUSE  | 0.96034669 | 0.3751769  |
| RL10A_MOUSE | 1.00142439 | 0.98769481 |
| RL12_MOUSE  | 0.95056575 | 0.34171317 |
| RL13_MOUSE  | 1.28649532 | 0.00542686 |
| RL14_MOUSE  | 1.00173738 | 0.93064614 |
| RL17_MOUSE  | 1.13475299 | 0.01307892 |
| RL21_MOUSE  | 0.9770437  | 0.56401543 |
| RL3_MOUSE   | 1.05475442 | 0.1105932  |
| RL38_MOUSE  | 0.96130319 | 0.51849438 |
| RL4_MOUSE   | 1.02406662 | 0.76887408 |
| RL5_MOUSE   | 1.01958825 | 0.87470122 |
| RL6_MOUSE   | 1.04220487 | 0.48659376 |
| RL7_MOUSE   | 1.0676172  | 0.40007301 |
| RL7A_MOUSE  | 0.96774819 | 0.44636191 |
| RL8_MOUSE   | 1.0821383  | 0.34926238 |
| RLA0_MOUSE  | 0.8992624  | 0.01106995 |
| RLA1_MOUSE  | 1.01523076 | 0.88680788 |
| RLA2_MOUSE  | 0.87789947 | 0.16794652 |
| RM01_MOUSE  | 1.2219823  | 0.04654935 |

|             |            |            |
|-------------|------------|------------|
| RM12_MOUSE  | 0.85648028 | 0.0520232  |
| RM41_MOUSE  | 0.87317058 | 0.03167622 |
| RM50_MOUSE  | 0.89149707 | 0.03190142 |
| RMD1_MOUSE  | 0.92883811 | 0.15227402 |
| RMD3_MOUSE  | 0.94254166 | 0.15314214 |
| RO60_MOUSE  | 1.11781037 | 0.68018988 |
| ROBO2_MOUSE | 0.82465028 | 0.0682884  |
| ROCK2_MOUSE | 0.95463743 | 0.39349243 |
| ROGDI_MOUSE | 1.0133779  | 0.99429488 |
| RP3A_MOUSE  | 1.04420423 | 0.78576917 |
| RPGF2_MOUSE | 0.8806987  | 0.00810043 |
| RPGF4_MOUSE | 0.99700422 | 0.83229983 |
| RPGP1_MOUSE | 1.00151786 | 0.65251196 |
| RPGP2_MOUSE | 0.95419559 | 0.2416302  |
| RPN1_MOUSE  | 1.05715667 | 0.595989   |
| RPN2_MOUSE  | 1.04552002 | 0.35340898 |
| RRAS2_MOUSE | 0.98899762 | 0.6486666  |
| RRFM_MOUSE  | 1.01450603 | 0.90289726 |
| RS10_MOUSE  | 1.06915766 | 0.43863917 |
| RS11_MOUSE  | 1.05037568 | 0.50982213 |
| RS13_MOUSE  | 1.10662193 | 0.23947258 |
| RS14_MOUSE  | 1.01254505 | 0.94049481 |
| RS15A_MOUSE | 1.16267155 | 0.03871847 |
| RS18_MOUSE  | 1.03483303 | 0.67342642 |
| RS19_MOUSE  | 0.99985735 | 0.72847647 |
| RS2_MOUSE   | 1.03587276 | 0.43573595 |
| RS21_MOUSE  | 0.92580756 | 0.17150523 |
| RS24_MOUSE  | 0.86541691 | 0.05371257 |
| RS27A_MOUSE | 0.98427149 | 0.58368844 |
| RS27L_MOUSE | 1.07386022 | 0.19775328 |
| RS3_MOUSE   | 0.99402437 | 0.68947858 |
| RS3A_MOUSE  | 0.97666258 | 0.58078618 |
| RS4X_MOUSE  | 1.1468839  | 0.03459434 |
| RS6_MOUSE   | 1.02620985 | 0.75940861 |
| RS7_MOUSE   | 1.31546195 | 0.06390383 |
| RS8_MOUSE   | 0.95447842 | 0.22542809 |
| RS9_MOUSE   | 1.13896196 | 0.02750796 |
| RSSA_MOUSE  | 0.99236724 | 0.70690093 |
| RT23_MOUSE  | 1.01594625 | 0.82428655 |

|             |            |            |
|-------------|------------|------------|
| RT27_MOUSE  | 0.97009438 | 0.57369042 |
| RT29_MOUSE  | 1.39907581 | 0.10900803 |
| RT34_MOUSE  | 0.82251234 | 0.06443731 |
| RT36_MOUSE  | 1.14315833 | 0.05350938 |
| RT411_MOUSE | 1.15681922 | 0.1500766  |
| RTCB_MOUSE  | 1.01697094 | 0.59779571 |
| RTN1_MOUSE  | 0.9446657  | 0.24741342 |
| RTN3_MOUSE  | 0.88792286 | 0.01867472 |
| RTN4_MOUSE  | 0.93562716 | 0.19360728 |
| RUFY3_MOUSE | 0.90360467 | 0.03603376 |
| RUVB1_MOUSE | 0.85495002 | 0.12017311 |
| RYR2_MOUSE  | 0.96981415 | 0.45958464 |
| S100B_MOUSE | 1.07615757 | 0.79393762 |
| S10AD_MOUSE | 0.98142271 | 0.58792829 |
| S12A2_MOUSE | 0.96411232 | 0.36278421 |
| S12A5_MOUSE | 1.08186295 | 0.21279942 |
| S14L2_MOUSE | 1.31982417 | 0.03278987 |
| S1PR1_MOUSE | 1.07335572 | 0.6308228  |
| S20A2_MOUSE | 1.18114112 | 0.02850308 |
| S2542_MOUSE | 1.23876352 | 0.03489096 |
| S2546_MOUSE | 1.05755188 | 0.36558275 |
| S2551_MOUSE | 1.02868958 | 0.58016194 |
| S27A4_MOUSE | 0.99510606 | 0.83680909 |
| S38A3_MOUSE | 1.05171259 | 0.70640212 |
| S39AA_MOUSE | 0.93959314 | 0.40388843 |
| S4A10_MOUSE | 1.08297921 | 0.0026341  |
| S4A4_MOUSE  | 1.03002366 | 0.45470768 |
| S6A11_MOUSE | 1.04479066 | 0.67881269 |
| S6A17_MOUSE | 0.98198456 | 0.55952686 |
| S7A14_MOUSE | 1.07678813 | 0.41793214 |
| SAC1_MOUSE  | 1.05463631 | 0.25844817 |
| SAHH_MOUSE  | 0.97767876 | 0.4836327  |
| SAHH2_MOUSE | 1.04947005 | 0.23387923 |
| SAHH3_MOUSE | 1.20571249 | 0.00609146 |
| SAM50_MOUSE | 1.01565246 | 0.8108083  |
| SAR1B_MOUSE | 1.01195537 | 0.90494495 |
| SATT_MOUSE  | 1.27179318 | 0.00018258 |
| SC22B_MOUSE | 1.04644217 | 0.84820811 |
| SC23A_MOUSE | 1.02069283 | 0.70997051 |

|              |            |            |
|--------------|------------|------------|
| SC6A1_MOUSE  | 1.04704687 | 0.44402493 |
| SC6A9_MOUSE  | 1.04501706 | 0.99659996 |
| SCAI_MOUSE   | 1.00814605 | 0.96001856 |
| SCAM1_MOUSE  | 0.91149406 | 0.05312665 |
| SCAM3_MOUSE  | 0.95695415 | 0.37448447 |
| SCAM5_MOUSE  | 1.00947592 | 0.97083037 |
| SCFD1_MOUSE  | 0.90936702 | 0.10148419 |
| SCMC2_MOUSE  | 1.15307934 | 0.00565949 |
| SCMC3_MOUSE  | 0.99125703 | 0.6576777  |
| SCN1A_MOUSE  | 0.96107431 | 0.32573638 |
| SCN2B_MOUSE  | 0.91962198 | 0.04399186 |
| SCN9A_MOUSE  | 0.98267841 | 0.54947868 |
| SCOT1_MOUSE  | 0.97196405 | 0.32820464 |
| SCPDL_MOUSE  | 0.96689258 | 0.38797649 |
| SCRN1_MOUSE  | 0.89931972 | 0.01521    |
| SDHA_MOUSE   | 1.01064141 | 0.97560476 |
| SDHB_MOUSE   | 1.01242014 | 0.87286453 |
| SEM4A_MOUSE  | 1.2110218  | 0.22946015 |
| SEPT11_MOUSE | 1.02676427 | 0.89044176 |
| SEPT2_MOUSE  | 1.10808339 | 0.03104252 |
| SEPT3_MOUSE  | 0.98088199 | 0.43153585 |
| SEPT4_MOUSE  | 0.93352012 | 0.34317225 |
| SEPT5_MOUSE  | 0.98490978 | 0.53662693 |
| SEPT6_MOUSE  | 0.98069654 | 0.49533197 |
| SEPT7_MOUSE  | 0.97871305 | 0.56888885 |
| SEPT8_MOUSE  | 1.05738837 | 0.3594926  |
| SEPT9_MOUSE  | 0.96973026 | 0.16991516 |
| SERA_MOUSE   | 0.92761969 | 0.08067915 |
| SERC_MOUSE   | 0.98622933 | 0.66072066 |
| SFXN1_MOUSE  | 1.06569193 | 0.36873902 |
| SFXN3_MOUSE  | 0.98838765 | 0.60074401 |
| SFXN5_MOUSE  | 1.05890098 | 0.59976321 |
| SGIP1_MOUSE  | 1.02558421 | 0.63590875 |
| SGSM1_MOUSE  | 1.01947642 | 0.8455668  |
| SGT1_MOUSE   | 1.00218841 | 0.70255641 |
| SGTB_MOUSE   | 1.04878091 | 0.50861808 |
| SH3G1_MOUSE  | 0.81574453 | 0.05437591 |
| SH3G2_MOUSE  | 0.84639204 | 0.01048259 |
| SH3G3_MOUSE  | 0.82058712 | 0.01296663 |

|             |            |            |
|-------------|------------|------------|
| SH3K1_MOUSE | 0.85272449 | 0.10281332 |
| SH3L3_MOUSE | 1.07402202 | 0.66597029 |
| SHAN1_MOUSE | 0.98526062 | 0.57276709 |
| SHAN2_MOUSE | 0.96519912 | 0.36678548 |
| SHAN3_MOUSE | 0.96995783 | 0.4804189  |
| SHLB1_MOUSE | 0.90725642 | 0.06069977 |
| SHLB2_MOUSE | 0.92642359 | 0.11529593 |
| SHPS1_MOUSE | 1.07856662 | 0.152269   |
| SHSA7_MOUSE | 1.00105769 | 0.78460967 |
| SI1L1_MOUSE | 0.957487   | 0.3542715  |
| SIR2_MOUSE  | 0.95892558 | 0.57611729 |
| SIR3_MOUSE  | 1.12625971 | 0.27961822 |
| SIR5_MOUSE  | 1.09770497 | 0.57014935 |
| SKP1_MOUSE  | 0.91001624 | 0.09055613 |
| SKT_MOUSE   | 0.99757909 | 0.71681481 |
| SL9A1_MOUSE | 1.03318016 | 0.69987297 |
| SLIRP_MOUSE | 1.03305584 | 0.51598989 |
| SLK_MOUSE   | 0.99291245 | 0.64218009 |
| SMAP2_MOUSE | 0.91995148 | 0.04765165 |
| SNAA_MOUSE  | 0.93173392 | 0.19459389 |
| SNAB_MOUSE  | 0.97627099 | 0.49522152 |
| SNAG_MOUSE  | 0.92826636 | 0.06734131 |
| SND1_MOUSE  | 1.00211889 | 0.82368544 |
| SNG1_MOUSE  | 0.93829235 | 0.08963179 |
| SNG3_MOUSE  | 1.11486259 | 0.15167164 |
| SNP25_MOUSE | 0.8594587  | 0.05255507 |
| SNP29_MOUSE | 1.03890399 | 0.483857   |
| SNP47_MOUSE | 1.08553901 | 0.50412404 |
| SNPH_MOUSE  | 0.94173791 | 0.14161218 |
| SNX1_MOUSE  | 0.92577111 | 0.18448065 |
| SNX12_MOUSE | 1.00808218 | 0.85986006 |
| SNX2_MOUSE  | 0.98818691 | 0.66347421 |
| SNX27_MOUSE | 0.95699162 | 0.27947091 |
| SNX3_MOUSE  | 1.1333266  | 0.06478907 |
| SNX30_MOUSE | 2.21771871 | 0.0721492  |
| SNX4_MOUSE  | 0.97005969 | 0.47716903 |
| SNX5_MOUSE  | 1.02008195 | 0.81734289 |
| SODM_MOUSE  | 1.08063166 | 0.477939   |
| SOGA3_MOUSE | 0.92122949 | 0.16849101 |



|             |            |            |
|-------------|------------|------------|
| SORCN_MOUSE | 0.94608544 | 0.14819572 |
| SPB6_MOUSE  | 1.19075801 | 0.07879967 |
| SPCS2_MOUSE | 1.06168626 | 0.72908468 |
| SPG7_MOUSE  | 1.0479023  | 0.50632023 |
| SPN90_MOUSE | 0.93930708 | 0.12426371 |
| SPRE_MOUSE  | 0.97061794 | 0.33119798 |
| SPRL1_MOUSE | 1.0922769  | 0.94911159 |
| SPRY4_MOUSE | 0.91714582 | 0.18315361 |
| SPTB1_MOUSE | 0.94671099 | 0.29081609 |
| SPTB2_MOUSE | 0.99272696 | 0.68333013 |
| SPTN1_MOUSE | 0.98083127 | 0.5849659  |
| SRBS1_MOUSE | 0.98999119 | 0.61263145 |
| SRBS2_MOUSE | 1.05058638 | 0.56344619 |
| SRC_MOUSE   | 0.99456918 | 0.64609853 |
| SRC8_MOUSE  | 0.9315716  | 0.09193389 |
| SRCN1_MOUSE | 0.9731187  | 0.40206964 |
| SRGP2_MOUSE | 0.93186495 | 0.17842562 |
| SRGP3_MOUSE | 0.9410716  | 0.19740883 |
| SRR_MOUSE   | 1.00273983 | 0.78911629 |
| SSBP_MOUSE  | 1.02858033 | 0.96214633 |
| SSDH_MOUSE  | 1.05336459 | 0.48457141 |
| ST4A1_MOUSE | 1.24981809 | 0.14885465 |
| STAM1_MOUSE | 0.96401984 | 0.28355118 |
| STB5L_MOUSE | 1.03537653 | 0.81945629 |
| STIP1_MOUSE | 0.90087173 | 0.02015739 |
| STK24_MOUSE | 1.09275702 | 0.50911679 |
| STK39_MOUSE | 0.9710908  | 0.43591398 |
| STML2_MOUSE | 1.03179651 | 0.87648485 |
| STMN1_MOUSE | 0.72510624 | 1.2867E-07 |
| STRAP_MOUSE | 0.94190064 | 0.36226366 |
| STRN_MOUSE  | 0.94415223 | 0.23880527 |
| STRN3_MOUSE | 0.87127657 | 0.0786812  |
| STRN4_MOUSE | 0.94730094 | 0.27475718 |
| STX12_MOUSE | 0.90608217 | 0.18293903 |
| STX1A_MOUSE | 0.94308441 | 0.27267773 |
| STX1B_MOUSE | 0.92815793 | 0.21488608 |
| STX7_MOUSE  | 0.96880581 | 0.47772908 |
| STXB1_MOUSE | 1.05753936 | 0.35767935 |
| STXB3_MOUSE | 0.893382   | 0.24011521 |

|             |            |            |
|-------------|------------|------------|
| STXB5_MOUSE | 0.99450876 | 0.71058841 |
| SUCA_MOUSE  | 1.06217273 | 0.5478979  |
| SUCB1_MOUSE | 1.021981   | 0.77281985 |
| SUCB2_MOUSE | 1.05904375 | 0.26430523 |
| SV2A_MOUSE  | 1.024776   | 0.81296736 |
| SV2B_MOUSE  | 0.95634854 | 0.27412844 |
| SVOP_MOUSE  | 0.94044311 | 0.25413697 |
| SYAC_MOUSE  | 0.92403912 | 0.02220938 |
| SYDC_MOUSE  | 1.04803505 | 0.79129583 |
| SYEP_MOUSE  | 0.93075566 | 0.09574481 |
| SYGP1_MOUSE | 0.95533963 | 0.29042545 |
| SYHC_MOUSE  | 0.90943028 | 0.07775275 |
| SYIM_MOUSE  | 1.03859941 | 0.58928987 |
| SYJ2B_MOUSE | 0.98332061 | 0.5946796  |
| SYK_MOUSE   | 1.33450634 | 0.61688277 |
| SYLM_MOUSE  | 0.97177975 | 0.47096078 |
| SYMM_MOUSE  | 1.09149155 | 0.16359392 |
| SYN1_MOUSE  | 1.03637882 | 0.58926886 |
| SYN2_MOUSE  | 1.0596935  | 0.64906204 |
| SYN3_MOUSE  | 1.07163465 | 0.16762455 |
| SYNC_MOUSE  | 0.94703939 | 0.26854893 |
| SYNE1_MOUSE | 0.92456657 | 0.072385   |
| SYNJ1_MOUSE | 1.02113633 | 0.85137508 |
| SYNPO_MOUSE | 0.99553727 | 0.84741596 |
| SYNPR_MOUSE | 0.96311067 | 0.36526735 |
| SYPH_MOUSE  | 0.9845774  | 0.49400302 |
| SYRC_MOUSE  | 1.0973343  | 0.20710731 |
| SYSC_MOUSE  | 1.03284382 | 0.71494256 |
| SYSM_MOUSE  | 1.04989415 | 0.71792161 |
| SYT1_MOUSE  | 0.98533916 | 0.52971826 |
| SYT12_MOUSE | 0.92375458 | 0.03499333 |
| SYT2_MOUSE  | 0.9861662  | 0.76967211 |
| SYT3_MOUSE  | 0.98845584 | 0.73235031 |
| SYT7_MOUSE  | 1.04949445 | 0.61120816 |
| SYTC_MOUSE  | 1.00540656 | 0.84947119 |
| SYTM_MOUSE  | 1.23043861 | 0.36645254 |
| SYUA_MOUSE  | 0.85037165 | 0.01035041 |
| SYUB_MOUSE  | 0.8592758  | 0.01747851 |
| SYVC_MOUSE  | 0.94623633 | 0.45948154 |

|             |            |            |
|-------------|------------|------------|
| SYWC_MOUSE  | 1.04217102 | 0.67100351 |
| SYYM_MOUSE  | 1.13322252 | 0.05768868 |
| T11L1_MOUSE | 0.9461901  | 0.42538745 |
| TACO1_MOUSE | 1.06659555 | 0.68833384 |
| TAGL3_MOUSE | 1.01180859 | 0.85287693 |
| TALDO_MOUSE | 0.88202615 | 0.02335911 |
| TANC2_MOUSE | 0.94793374 | 0.33942391 |
| TAU_MOUSE   | 0.92624884 | 0.22015272 |
| TB10B_MOUSE | 0.94753702 | 0.3484834  |
| TBA4A_MOUSE | 0.94867859 | 0.31322753 |
| TBB3_MOUSE  | 1.09699947 | 0.6596472  |
| TBB4A_MOUSE | 0.90742209 | 0.16494622 |
| TBB5_MOUSE  | 0.88218878 | 0.01988568 |
| TBRG4_MOUSE | 0.99649289 | 0.86518266 |
| TCPA_MOUSE  | 0.98982054 | 0.69752925 |
| TCPB_MOUSE  | 0.98585037 | 0.66673882 |
| TCPD_MOUSE  | 1.00836233 | 0.88921639 |
| TCPE_MOUSE  | 1.04022588 | 0.49950504 |
| TCPG_MOUSE  | 0.99198598 | 0.72968721 |
| TCPH_MOUSE  | 0.97792546 | 0.41557343 |
| TCPQ_MOUSE  | 0.98445085 | 0.47690159 |
| TCPR1_MOUSE | 0.95944132 | 0.22282383 |
| TCPZ_MOUSE  | 0.99504278 | 0.7495115  |
| TCTP_MOUSE  | 0.89399001 | 0.16265678 |
| TDRKH_MOUSE | 0.96790514 | 0.37029702 |
| TEBP_MOUSE  | 1.00688019 | 0.96098863 |
| TECR_MOUSE  | 0.94458914 | 0.22841347 |
| TENA_MOUSE  | 1.22311041 | 0.50258319 |
| TENR_MOUSE  | 0.93551093 | 0.15694335 |
| TERA_MOUSE  | 1.01049795 | 0.95930683 |
| TFAM_MOUSE  | 0.92913588 | 0.26154215 |
| TFR1_MOUSE  | 0.87528874 | 0.02695667 |
| THEM4_MOUSE | 1.00142319 | 0.85353249 |
| THEM6_MOUSE | 1.11408056 | 0.97465368 |
| THIC_MOUSE  | 1.00423726 | 0.99748874 |
| THIKA_MOUSE | 1.04476178 | 0.44730613 |
| THIL_MOUSE  | 0.98463867 | 0.55561864 |
| THIM_MOUSE  | 1.02418541 | 0.91047678 |
| THNS1_MOUSE | 0.96415427 | 0.37261571 |

|             |            |            |
|-------------|------------|------------|
| THOP1_MOUSE | 0.90023    | 0.1180073  |
| THTM_MOUSE  | 1.04462611 | 0.40216014 |
| THTR_MOUSE  | 1.1169525  | 0.22702532 |
| THY1_MOUSE  | 1.06909276 | 0.54064922 |
| TIM10_MOUSE | 0.96762335 | 0.56359936 |
| TIM13_MOUSE | 0.90944571 | 0.01948205 |
| TIM29_MOUSE | 1.11820605 | 0.06579198 |
| TIM44_MOUSE | 0.9690974  | 0.40315824 |
| TIM50_MOUSE | 0.94690242 | 0.05604746 |
| TKT_MOUSE   | 0.9640878  | 0.26778813 |
| TLN2_MOUSE  | 0.92267038 | 0.02838861 |
| TM160_MOUSE | 1.06120632 | 0.28164074 |
| TM1L2_MOUSE | 0.91096165 | 0.04149846 |
| TMM11_MOUSE | 0.99971579 | 0.9235086  |
| TMM33_MOUSE | 1.11270596 | 0.12955369 |
| TMM65_MOUSE | 0.99989303 | 0.76880802 |
| TMOD2_MOUSE | 1.00595735 | 0.93766663 |
| TMX2_MOUSE  | 0.99040111 | 0.77287943 |
| TMX3_MOUSE  | 1.00623572 | 0.95218588 |
| TMX4_MOUSE  | 1.02786535 | 0.99878993 |
| TNPO3_MOUSE | 1.08265063 | 0.51795623 |
| TOLIP_MOUSE | 0.88994856 | 0.02700395 |
| TOM1_MOUSE  | 1.0782633  | 0.30007052 |
| TOM22_MOUSE | 0.87148339 | 0.00639301 |
| TOM40_MOUSE | 0.92871867 | 0.31824035 |
| TOM70_MOUSE | 0.93413348 | 0.0500182  |
| TP4A2_MOUSE | 1.26450248 | 0.08853068 |
| TPC_MOUSE   | 0.85941666 | 0.03571952 |
| TPD52_MOUSE | 0.88589387 | 0.05024765 |
| TPD54_MOUSE | 0.97256609 | 0.50168166 |
| TPIS_MOUSE  | 0.96156479 | 0.30606936 |
| TPM1_MOUSE  | 0.82158649 | 0.07685962 |
| TPM3_MOUSE  | 0.83181788 | 0.12636424 |
| TPP2_MOUSE  | 0.96435444 | 0.31314126 |
| TPPP_MOUSE  | 0.98983512 | 0.74011714 |
| TPPP3_MOUSE | 0.87549819 | 0.00034584 |
| TPRGL_MOUSE | 1.00638025 | 0.93669913 |
| TRAP1_MOUSE | 1.0252592  | 0.79771354 |
| TRFE_MOUSE  | 0.86161976 | 0.07740691 |

|             |            |            |
|-------------|------------|------------|
| TRIM2_MOUSE | 0.99869517 | 0.76358175 |
| TRIM3_MOUSE | 0.90037685 | 0.00616791 |
| TRIO_MOUSE  | 0.98451337 | 0.57920402 |
| TRPV2_MOUSE | 1.06253942 | 0.75566225 |
| TRXR1_MOUSE | 1.182234   | 0.09563947 |
| TRXR2_MOUSE | 1.10992567 | 0.30197998 |
| TS101_MOUSE | 0.9987235  | 0.8092808  |
| TSN_MOUSE   | 0.85806948 | 0.01495171 |
| TSN2_MOUSE  | 0.78755327 | 0.01246341 |
| TSN7_MOUSE  | 1.02855261 | 0.94388463 |
| TSR2_MOUSE  | 0.78993627 | 0.01591154 |
| TTC19_MOUSE | 1.08804145 | 0.48822944 |
| TTC7B_MOUSE | 1.03321879 | 0.38739963 |
| TTYH1_MOUSE | 1.09244013 | 0.35325209 |
| TTYH3_MOUSE | 1.98762773 | 0.06407048 |
| TWF1_MOUSE  | 0.96596414 | 0.3479013  |
| TWF2_MOUSE  | 1.0414985  | 0.28373539 |
| TXD12_MOUSE | 0.90612918 | 0.21537386 |
| TXND5_MOUSE | 0.95008826 | 0.27725032 |
| TXNL1_MOUSE | 0.96188283 | 0.29792632 |
| TXTP_MOUSE  | 0.99610194 | 0.83089066 |
| TY3H_MOUSE  | 0.96575574 | 0.52756912 |
| UB2L3_MOUSE | 1.05690793 | 0.3724886  |
| UB2V2_MOUSE | 1.04748754 | 0.60753069 |
| UBA1_MOUSE  | 0.95168029 | 0.28156258 |
| UBA5_MOUSE  | 0.94309139 | 0.23308059 |
| UBC12_MOUSE | 0.95529765 | 0.14945501 |
| UBE2N_MOUSE | 0.99700888 | 0.79835596 |
| UBE2O_MOUSE | 0.99411847 | 0.84077818 |
| UBP14_MOUSE | 0.96358024 | 0.2858734  |
| UBP5_MOUSE  | 0.97341633 | 0.38453958 |
| UBP7_MOUSE  | 0.95512982 | 0.51509324 |
| UBQL1_MOUSE | 0.91287205 | 0.16683312 |
| UBQL2_MOUSE | 0.96792371 | 0.37771157 |
| UBR4_MOUSE  | 1.07291953 | 0.30335954 |
| UBXN6_MOUSE | 1.09404209 | 0.43693386 |
| UCHL1_MOUSE | 0.94324162 | 0.13856474 |
| UCHL3_MOUSE | 0.97188485 | 0.48368161 |
| UCRI_MOUSE  | 1.11489258 | 0.08478631 |

|             |            |            |
|-------------|------------|------------|
| UGPA_MOUSE  | 1.0308431  | 0.88989633 |
| ULA1_MOUSE  | 0.98113754 | 0.54432128 |
| UN13A_MOUSE | 1.01711656 | 0.60763339 |
| UQCC1_MOUSE | 0.92407424 | 0.02441843 |
| USMG5_MOUSE | 1.02403423 | 0.93235496 |
| USO1_MOUSE  | 0.95990583 | 0.34881409 |
| USP9X_MOUSE | 0.9799593  | 0.40949594 |
| VA0D1_MOUSE | 1.024633   | 0.77378582 |
| VAC14_MOUSE | 1.11176354 | 0.31734126 |
| VAMP1_MOUSE | 0.89368993 | 0.07889834 |
| VAMP2_MOUSE | 0.87252571 | 0.08498467 |
| VAPA_MOUSE  | 1.14396064 | 0.08326456 |
| VAPB_MOUSE  | 0.97259054 | 0.42178386 |
| VAS1_MOUSE  | 1.0109867  | 0.93260932 |
| VAT1_MOUSE  | 1.12942398 | 0.02496447 |
| VAT1L_MOUSE | 1.08616339 | 0.0217056  |
| VATA_MOUSE  | 0.97969198 | 0.53996233 |
| VATB2_MOUSE | 1.03428276 | 0.63523004 |
| VATC1_MOUSE | 1.01698142 | 0.7358551  |
| VATD_MOUSE  | 1.01549774 | 0.91317265 |
| VATE1_MOUSE | 0.9533422  | 0.18390816 |
| VATF_MOUSE  | 0.975514   | 0.31551618 |
| VATG1_MOUSE | 0.91381164 | 0.12155224 |
| VATG2_MOUSE | 0.92537756 | 0.12362507 |
| VATH_MOUSE  | 1.04035333 | 0.51400887 |
| VATL_MOUSE  | 1.43817644 | 0.0089681  |
| VCAM1_MOUSE | 1.1060851  | 0.154121   |
| VCIP1_MOUSE | 0.89452199 | 0.02421264 |
| VDAC1_MOUSE | 0.96794906 | 0.35573662 |
| VDAC2_MOUSE | 0.94635447 | 0.05771806 |
| VDAC3_MOUSE | 0.96134227 | 0.23916539 |
| VGLU1_MOUSE | 1.12942693 | 0.27134059 |
| VGLU2_MOUSE | 0.95270776 | 0.29404936 |
| VIAAT_MOUSE | 1.08785407 | 0.19056714 |
| VIME_MOUSE  | 0.82043361 | 0.00221274 |
| VINC_MOUSE  | 1.00728389 | 0.9974669  |
| VISL1_MOUSE | 0.91172632 | 0.03859952 |
| VMA5A_MOUSE | 1.04581816 | 0.84178722 |
| VP13A_MOUSE | 1.04297438 | 0.61735275 |

|             |            |            |
|-------------|------------|------------|
| VP13C_MOUSE | 0.92050447 | 0.236069   |
| VP26A_MOUSE | 1.01525119 | 0.95772505 |
| VP26B_MOUSE | 1.01425214 | 0.84112908 |
| VPP1_MOUSE  | 0.99153302 | 0.66960457 |
| VPS16_MOUSE | 1.10985587 | 0.3395319  |
| VPS29_MOUSE | 1.07236188 | 0.55709807 |
| VPS35_MOUSE | 0.99336806 | 0.67153648 |
| VPS45_MOUSE | 1.07015371 | 0.0585805  |
| VPS50_MOUSE | 1.02366727 | 0.78410892 |
| VPS51_MOUSE | 1.03896638 | 0.61273325 |
| VPS53_MOUSE | 1.20042907 | 0.18981004 |
| VTA1_MOUSE  | 0.92807145 | 0.03330006 |
| VWA8_MOUSE  | 1.01780504 | 0.90252564 |
| WASF1_MOUSE | 0.96679698 | 0.28621079 |
| WASF3_MOUSE | 0.93731895 | 0.41155407 |
| WASL_MOUSE  | 1.24999272 | 0.0501783  |
| WBP2_MOUSE  | 1.0204201  | 0.9553125  |
| WDFY3_MOUSE | 1.10767713 | 0.26354883 |
| WDR1_MOUSE  | 1.03237583 | 0.56281059 |
| WDR37_MOUSE | 1.05139273 | 0.3096423  |
| WDR44_MOUSE | 0.87542043 | 0.18360738 |
| WDR47_MOUSE | 1.00684118 | 0.93506322 |
| WDR48_MOUSE | 1.01385339 | 0.85738402 |
| WDR7_MOUSE  | 0.98605399 | 0.64379707 |
| WFS1_MOUSE  | 1.01617449 | 0.87820962 |
| WIPI2_MOUSE | 1.03539309 | 0.4650419  |
| WNK2_MOUSE  | 1.12406668 | 0.17475338 |
| XPO1_MOUSE  | 1.07081961 | 0.58406158 |
| XPO2_MOUSE  | 0.99901198 | 0.81706332 |
| XPO7_MOUSE  | 1.06797572 | 0.83036433 |
| XPP1_MOUSE  | 0.92329385 | 0.03712718 |
| YKT6_MOUSE  | 0.96367688 | 0.32493949 |
| ZC21A_MOUSE | 0.97277742 | 0.48864905 |
| ZNT3_MOUSE  | 0.9808544  | 0.46353926 |
| ZNT9_MOUSE  | 1.02329844 | 0.64256207 |
| ZO1_MOUSE   | 1.11821229 | 0.04610989 |
| ZO2_MOUSE   | 0.88341097 | 0.02445254 |
