# Supplementary material for: Identification of substrates of palmitoyl protein thioesterase 1 highlights roles of depalmitoylation in disulfide bond formation and synaptic function
Source: PubMed Central journal article supplement (PMC9004782; doi:10.1371/journal.pbio.3001590), 2022-03-31
Supplement: pbio.3001590.s003.pdf [file pbio.3001590.s003.pdf]

**S2 Table. Proteins exhibiting significant changes in WT versus PPT1 KO synaptic palmitome.**

These data correspond to **Figure 2B** and are the expression ratios for proteins that exhibit significant changes in the palmitome (n = 242). Proteins marked with an asterisk (\*) were removed from subsequent consideration as PPT1 substrates due to decreased palmitoylation (n = 4: HDHD2, S1PR1, SNX1, UBQL2 ; blue <1.5-fold change), presence in the CRAPome [97] (n = 9: 1433E, COF1, HNRPU, KP YM, RL13, RL22, RL4, RLA0, TCPD), lack of a cysteine residue (n = 2: NDUA6, SYUA), increased palmitoylation and protein expression (n = 4: ASAH1, CATD, SCR B2, and TPP1), or lack of detection in the synaptic proteome (n = 19: CKAP4, CPNE1, FHL1, GPC5B, ITM2B, ITM2C, LGI2, MAGI1, NSMA2, PP1G, PRDX4, R7BP, RB3GP, S39AC, TPPC3, VAMP7, XKR4, S1PR1, MYO6, PDPR; removed proteins S1PR1, HNRPU, and RL22 also fall in this category). The remaining 204 proteins are the final list of putative PPT1 substrates prior to the validation screen. P-values were calculated using a two-tailed t-test. Red denotes significantly increased expression in the palmitome (>1.5-fold).

| UniProt ID   | Average Ratio (KO/WT) | P value    |
|--------------|-----------------------|------------|
| HDHD2_MOUSE* | 0.65809308            | 0.02504326 |
| S1PR1_MOUSE* | 0.43333627            | 0.01690137 |
| SNX1_MOUSE*  | 0.55468914            | 0.0240519  |
| UBQL2_MOUSE* | 0.57153189            | 0.01479205 |
| 1433B_MOUSE  | 6.16513858            | 0.03447738 |
| 1433E_MOUSE* | 1.7373229             | 0.04223438 |
| 6PGL_MOUSE   | 37.011627             | 0.04825557 |
| ABHGA_MOUSE  | 1.73812986            | 0.02325394 |
| ABR_MOUSE    | 2.0655242             | 0.0190207  |
| ACON_MOUSE   | 2.37614763            | 0.0264551  |
| ACSF2_MOUSE  | 6.85911933            | 0.04305497 |
| ACTN1_MOUSE  | 2.94150451            | 0.00907073 |
| ADDG_MOUSE   | 2.02630442            | 0.0064112  |
| AIFM1_MOUSE  | 2.81649658            | 0.04296289 |
| AL1L1_MOUSE  | 3.12190544            | 0.01219849 |
| AL3A2_MOUSE  | 2.23955338            | 0.02893705 |
| ANK3_MOUSE   | 2.44174507            | 0.02532274 |
| AP2A1_MOUSE  | 1.65944151            | 0.02989611 |
| AP2B1_MOUSE  | 2.39035809            | 0.02267046 |
| AP2M1_MOUSE  | 2.50176909            | 0.04655494 |
| ASAH1_MOUSE* | 5.01610876            | 0.00167502 |
| ASTN1_MOUSE  | 1.66472933            | 0.01603359 |
| AT1A1_MOUSE  | 1.83121203            | 0.00714207 |
| AT1A2_MOUSE  | 1.74425582            | 0.0026334  |
| AT1A3_MOUSE  | 1.74595803            | 0.02985501 |
| AT1B1_MOUSE  | 2.17994482            | 0.01875778 |
| AT1B2_MOUSE  | 6.85159323            | 0.01769292 |

|              |            |            |
|--------------|------------|------------|
| AT2B4_MOUSE  | 1.73884867 | 0.01144252 |
| ATAD3_MOUSE  | 1.77376102 | 0.03722607 |
| ATP5E_MOUSE  | 2.93731529 | 0.03721463 |
| ATPG_MOUSE   | 3.39113512 | 0.03156482 |
| ATPO_MOUSE   | 6.13811283 | 0.04397278 |
| BAIP2_MOUSE  | 2.59538287 | 0.04601941 |
| BASI_MOUSE   | 2.69458393 | 0.0156804  |
| BRSK2_MOUSE  | 1.84487865 | 0.01505495 |
| CA2D1_MOUSE  | 3.16785152 | 0.01823684 |
| CAC1E_MOUSE  | 2.08654395 | 0.00724175 |
| CADM2_MOUSE  | 1.97486452 | 0.00348435 |
| CAPS1_MOUSE  | 2.47981609 | 0.04828016 |
| CATD_MOUSE*  | 8.6144266  | 0.00377278 |
| CBPE_MOUSE   | 3.12398966 | 0.04667749 |
| CCG8_MOUSE   | 3.17187285 | 0.02036904 |
| CCNY_MOUSE   | 3.50274587 | 0.01081474 |
| CD47_MOUSE   | 2.98286693 | 0.00840764 |
| CD81_MOUSE   | 2.55345522 | 0.04181171 |
| CISD1_MOUSE  | 1.91992184 | 0.0499723  |
| CISY_MOUSE   | 2.97152825 | 0.02582269 |
| CKAP4_MOUSE* | 1.8302586  | 0.03220663 |
| CLH1_MOUSE   | 2.80442701 | 0.02324201 |
| CLUS_MOUSE   | 7.87342416 | 0.02781312 |
| CNDP2_MOUSE  | 1.57796766 | 0.03215849 |
| COF1_MOUSE*  | 3.70220246 | 0.02701788 |
| COTL1_MOUSE  | 2.24339821 | 0.02674421 |
| COX2_MOUSE   | 1.66755743 | 0.04724754 |
| COX41_MOUSE  | 8.04690807 | 0.02848797 |
| CPNE1_MOUSE* | 3.37323728 | 0.04085177 |
| CRIP2_MOUSE  | 6.82769925 | 0.04955228 |
| CSPG2_MOUSE  | 6.24611017 | 0.04521241 |
| CTNA2_MOUSE  | 1.87486094 | 0.04632975 |
| CXA1_MOUSE   | 2.91852558 | 0.03654657 |
| CYFP1_MOUSE  | 11.9840583 | 0.04398267 |
| DCE1_MOUSE   | 2.84288313 | 0.04296491 |
| DCE2_MOUSE   | 1.87714304 | 0.0499237  |
| DCLK1_MOUSE  | 2.62481528 | 0.02118323 |
| DCTN1_MOUSE  | 1.56010131 | 0.01730595 |
| DDB1_MOUSE   | 2.72411734 | 0.00475071 |

|              |            |            |
|--------------|------------|------------|
| DEST_MOUSE   | 4.34731089 | 0.02196256 |
| DHB4_MOUSE   | 1.69748231 | 0.04491371 |
| DIP2B_MOUSE  | 1.96580728 | 0.03076635 |
| DMXL2_MOUSE  | 1.63516189 | 0.03312546 |
| DNJC5_MOUSE  | 5.11996889 | 0.01085887 |
| DPP6_MOUSE   | 1.5301643  | 0.01851725 |
| DYL2_MOUSE   | 4.19224278 | 0.02707414 |
| DYN1_MOUSE   | 2.31587103 | 0.04280089 |
| EFTU_MOUSE   | 1.52726819 | 0.00581057 |
| ENTP2_MOUSE  | 2.19407876 | 0.00625933 |
| EP15R_MOUSE  | 1.80511174 | 0.04214984 |
| EPHA4_MOUSE  | 2460.83085 | 0.01654109 |
| ERP29_MOUSE  | 17.3706319 | 0.02648587 |
| F10A1_MOUSE  | 2.09881456 | 0.03346201 |
| FA49B_MOUSE  | 2.07208701 | 0.0411204  |
| FAS_MOUSE    | 2.07741976 | 0.01219864 |
| FBX41_MOUSE  | 2.70989241 | 0.0363276  |
| FHL1_MOUSE*  | 3.34333736 | 0.03506652 |
| FUMH_MOUSE   | 2.42120508 | 0.04220973 |
| GABR1_MOUSE  | 3.28428604 | 0.01480859 |
| GABR2_MOUSE  | 3.43425887 | 0.03273567 |
| GBB2_MOUSE   | 2.96271577 | 0.00257017 |
| GBRG2_MOUSE  | 8.89414293 | 0.03526663 |
| GNA13_MOUSE  | 2.49947339 | 0.00290725 |
| GNAI1_MOUSE  | 3.3179847  | 0.02874637 |
| GNAI2_MOUSE  | 4.67638206 | 0.03740986 |
| GNAO_MOUSE   | 4.80553608 | 0.02535557 |
| GNAQ_MOUSE   | 3.93664545 | 0.03285901 |
| GNAZ_MOUSE   | 2.89572628 | 0.02645697 |
| GPC5B_MOUSE* | 4.4881951  | 0.02189772 |
| GPDA_MOUSE   | 2.07136789 | 0.04772962 |
| GPM6A_MOUSE  | 5.62523104 | 0.00678947 |
| GRIA1_MOUSE  | 1.86606467 | 0.04587879 |
| GRIA2_MOUSE  | 2.00334698 | 0.03965339 |
| GRP78_MOUSE  | 1.71353245 | 0.00515339 |
| GTR1_MOUSE   | 2.82450062 | 0.04301984 |
| HCN1_MOUSE   | 1.84696478 | 0.03383597 |
| HEXB_MOUSE   | 2.25030845 | 0.04017271 |
| HNRPU_MOUSE* | 3.08409018 | 0.03077163 |

|              |            |            |
|--------------|------------|------------|
| HS12A_MOUSE  | 2.02599041 | 0.04575905 |
| HSP74_MOUSE  | 2.09076683 | 0.02485589 |
| HXK1_MOUSE   | 1.86417568 | 0.03223978 |
| IMPA1_MOUSE  | 3.86612134 | 0.0392026  |
| ITM2B_MOUSE* | 7.39999446 | 0.00713478 |
| ITM2C_MOUSE* | 4.82790884 | 0.0202228  |
| ITSN1_MOUSE  | 2.93919762 | 0.02534814 |
| IVD_MOUSE    | 1.62426359 | 0.0289076  |
| KCC2D_MOUSE  | 1.56455433 | 0.01699244 |
| KCND2_MOUSE  | 3.5143829  | 0.00905985 |
| KCRB_MOUSE   | 1.81458902 | 0.02929205 |
| KI21A_MOUSE  | 1.84691714 | 0.0114136  |
| KIF5C_MOUSE  | 1.66905138 | 0.03508453 |
| KPYM_MOUSE*  | 2.01532364 | 0.01438118 |
| KTN1_MOUSE   | 2.7855293  | 0.01301305 |
| LAT1_MOUSE   | 4.00246603 | 0.03615308 |
| LDHB_MOUSE   | 1.92755339 | 0.04998723 |
| LETM1_MOUSE  | 1.85597866 | 0.04277988 |
| LGI1_MOUSE   | 2.04735999 | 0.01299686 |
| LGI2_MOUSE*  | 4.74635604 | 0.04678316 |
| LIPA3_MOUSE  | 1.68592935 | 0.0239067  |
| LIS1_MOUSE   | 2.0801692  | 0.02626258 |
| LRRC7_MOUSE  | 1.93307508 | 5.4308E-05 |
| M2OM_MOUSE   | 3.10655303 | 0.03588682 |
| MADD_MOUSE   | 2.7802968  | 0.02157297 |
| MAGI1_MOUSE* | 2.71135344 | 0.00303765 |
| MBLC2_MOUSE  | 7.94560385 | 0.01830526 |
| MIA40_MOUSE  | 8.28682583 | 0.04383079 |
| MPP2_MOUSE   | 2.37879293 | 0.02489248 |
| MPP6_MOUSE   | 1.96903366 | 0.00068579 |
| MRCKB_MOUSE  | 3.37056361 | 0.00453073 |
| MYO6_MOUSE*  | 7.65775067 | 0.04038318 |
| NAC1_MOUSE   | 1.60781165 | 0.0205655  |
| NCALD_MOUSE  | 45.0986498 | 0.03333189 |
| NCKP1_MOUSE  | 1.76101097 | 0.03686968 |
| NDKA_MOUSE   | 5.18466229 | 0.01994241 |
| NDUA6_MOUSE* | 3.22566946 | 0.04169493 |
| NDUS1_MOUSE  | 1.85921323 | 0.00543366 |
| NF1_MOUSE    | 4.40251115 | 0.02493713 |

|              |            |            |
|--------------|------------|------------|
| NFASC_MOUSE  | 1.52392687 | 0.03292294 |
| NNTM_MOUSE*  | 5.15295413 | 0.00064755 |
| NRCAM_MOUSE  | 1.71358651 | 0.01137874 |
| NRX3A_MOUSE  | 2.86290478 | 0.02537298 |
| NSF_MOUSE    | 1.79680977 | 0.01105155 |
| NSMA2_MOUSE* | 3.0656357  | 0.01513815 |
| NTRI_MOUSE   | 4.06026601 | 0.03255085 |
| OAT_MOUSE    | 2.38337287 | 0.04077862 |
| ODO1_MOUSE   | 2.73375853 | 0.0474292  |
| ODPX_MOUSE   | 1.55516198 | 0.01906577 |
| OPA1_MOUSE   | 1.90523472 | 0.04247727 |
| OXR1_MOUSE   | 1.65508292 | 0.00273805 |
| PALM2_MOUSE  | 4.02528407 | 0.01746552 |
| PCCA_MOUSE   | 1.52423112 | 0.03218611 |
| PDE2A_MOUSE  | 1.70966649 | 0.01001083 |
| PDIA4_MOUSE  | 3.02013745 | 0.0411904  |
| PDPR_MOUSE*  | 2.17601378 | 0.00014154 |
| PGM1_MOUSE   | 1.97753773 | 0.00126391 |
| PI4KA_MOUSE  | 2.83055274 | 0.0147451  |
| PLCB1_MOUSE  | 1.99490751 | 0.01982732 |
| PLPR4_MOUSE  | 2.50426577 | 0.01188047 |
| PNPT1_MOUSE  | 47.0149712 | 0.03136547 |
| PP1G_MOUSE*  | 4.42574217 | 0.04759373 |
| PP2BA_MOUSE  | 1.76925852 | 0.02415911 |
| PRDX4_MOUSE* | 4.45364429 | 0.0123701  |
| PRDX6_MOUSE  | 1.6130104  | 0.0298685  |
| PRRT3_MOUSE  | 2.28770195 | 0.02904083 |
| PTPRD_MOUSE  | 2.86420019 | 0.03072229 |
| PTPRS_MOUSE  | 2.25908928 | 0.02607941 |
| PYGB_MOUSE   | 3.99445536 | 0.03208737 |
| R7BP_MOUSE*  | 12.474933  | 0.04004716 |
| RAB1A_MOUSE  | 3.9013582  | 0.04863898 |
| RAB3B_MOUSE  | 11.741844  | 0.01679947 |
| RAB7A_MOUSE  | 1.84884089 | 0.03543951 |
| RAN_MOUSE    | 2.49778976 | 0.02187895 |
| RAP2B_MOUSE  | 8.62180744 | 0.02144014 |
| RASH_MOUSE   | 3.37978611 | 0.01763677 |
| RB3GP_MOUSE* | 4.54828995 | 0.01411416 |
| RBGPR_MOUSE  | 3.97162065 | 0.03226824 |

|              |            |            |
|--------------|------------|------------|
| RHOG_MOUSE   | 1.93802777 | 0.02717621 |
| RL13_MOUSE*  | 4.26738647 | 0.01404968 |
| RL22_MOUSE*  | 9.99948728 | 0.03805332 |
| RL4_MOUSE*   | 2.71230165 | 0.03870093 |
| RL5_MOUSE    | 2.24191057 | 0.0344874  |
| RLA0_MOUSE*  | 8.16503281 | 0.03251642 |
| RMD3_MOUSE   | 38.0510859 | 0.04528451 |
| RPGF4_MOUSE  | 2.68455757 | 0.02402321 |
| RPN1_MOUSE   | 4.6181334  | 0.01553258 |
| S12A2_MOUSE  | 2.59519204 | 0.03958399 |
| S39AC_MOUSE* | 2.75310155 | 0.04764758 |
| SAHH2_MOUSE  | 2.71243878 | 0.01356875 |
| SATT_MOUSE   | 8.42850683 | 0.04403561 |
| SC6A1_MOUSE  | 3.41449618 | 0.04661652 |
| SCAM1_MOUSE  | 3.27589443 | 0.03360363 |
| SCN1A_MOUSE  | 6.14798148 | 0.01534375 |
| SCRB2_MOUSE* | 3.72143443 | 0.00760874 |
| SDHB_MOUSE   | 2.84421004 | 0.02049879 |
| SEPT8_MOUSE  | 1.78476244 | 0.0198599  |
| SFXN1_MOUSE  | 7.93326104 | 0.04248025 |
| SFXN3_MOUSE  | 2.37253319 | 0.01622603 |
| SND1_MOUSE   | 2.10071498 | 0.03792139 |
| SPB6_MOUSE   | 2.54675778 | 0.02905788 |
| SPRL1_MOUSE  | 1.70498504 | 0.03331293 |
| SRBS2_MOUSE  | 2.21686344 | 0.04168358 |
| SSDH_MOUSE   | 1.66631376 | 0.00500585 |
| STXB1_MOUSE  | 1.75202274 | 0.03577848 |
| SUCB2_MOUSE  | 3.5185261  | 0.04360612 |
| SYIM_MOUSE   | 1.85343949 | 0.03479621 |
| SYNJ1_MOUSE  | 2.17892072 | 0.02888376 |
| SYNPR_MOUSE  | 6.44464358 | 0.01783558 |
| SYT2_MOUSE   | 2.48418822 | 0.04940637 |
| SYT7_MOUSE   | 2.72888773 | 0.01288555 |
| SYUA_MOUSE*  | 8.72755643 | 0.04972285 |
| TCPD_MOUSE*  | 1.7520083  | 0.01304949 |
| TCPH_MOUSE   | 2.26558686 | 0.02937783 |
| TERA_MOUSE   | 2.18260205 | 0.02571782 |
| THIKA_MOUSE  | 13.1940085 | 0.03926997 |
| THY1_MOUSE   | 3.3568611  | 0.02204422 |

|              |            |            |
|--------------|------------|------------|
| TIM13_MOUSE  | 3.78323177 | 0.02091121 |
| TPP1_MOUSE*  | 3.44625467 | 0.00473966 |
| TPPC3_MOUSE* | 2.46087779 | 0.01246953 |
| UBA1_MOUSE   | 2.30346159 | 0.0187566  |
| UBE2O_MOUSE  | 2.14510163 | 0.03154608 |
| UCRI_MOUSE   | 4.83957182 | 0.0492247  |
| USMG5_MOUSE  | 2.37515292 | 0.03253737 |
| VA0D1_MOUSE  | 4.63836049 | 0.03338637 |
| VAMP1_MOUSE  | 6.08333941 | 0.01721828 |
| VAMP7_MOUSE* | 15.422196  | 0.03328643 |
| VATE1_MOUSE  | 2.81657735 | 0.03904979 |
| VCIP1_MOUSE  | 4.69443448 | 0.03133417 |
| VDAC2_MOUSE  | 2.92874791 | 0.0286335  |
| VGLU2_MOUSE  | 1.96685604 | 0.00333991 |
| VISL1_MOUSE  | 2.45048957 | 0.03958976 |
| VPS29_MOUSE  | 25.4882128 | 0.04026089 |
| VPS35_MOUSE  | 2.28353437 | 0.01015621 |
| VTA1_MOUSE   | 39.3736025 | 0.04203121 |
| WFS1_MOUSE   | 5.30342783 | 0.04325322 |
| XKR4_MOUSE*  | 3.20447199 | 0.01798265 |
