# Supplementary material for: Identification of substrates of palmitoyl protein thioesterase 1 highlights roles of depalmitoylation in disulfide bond formation and synaptic function
Source: PubMed Central journal article supplement (PMC9004782; doi:10.1371/journal.pbio.3001590), 2022-03-31
Supplement: pbio.3001590.s004.pdf [file pbio.3001590.s004.pdf]

**S3 Table. Formerly palmitoylated peptides identified for putative PPT1 substrates.** [x] Carbamidomethyl indicates location of palmitoylated cysteine (C) in peptide sequence.

| Protein Name<br>(Uniprot ID) | Peptide Sequence        | Modifications                              |
|------------------------------|-------------------------|--------------------------------------------|
| ACON_MOUSE                   | CTTDHISAAGPWLK          | [1] Carbamidomethyl                        |
| ACON_MOUSE                   | DVGGIVLANACGPCIGQWDRK   | [11] Carbamidomethyl  [14] Carbamidomethyl |
| ACON_MOUSE                   | VAVPSTIHCDHLIEAQVGGEK   | [9] Carbamidomethyl                        |
| ACON_MOUSE                   | VGLIGSCTNSSYEDMGR       | [7] Carbamidomethyl                        |
| ACTN1_MOUSE                  | DGLGFCALIHR             | [6] Carbamidomethyl                        |
| ACTN1_MOUSE                  | EGLLLWCQR               | [7] Carbamidomethyl                        |
| AL1L1_MOUSE                  | ECDVLPDDTVSTLYNR        | [2] Carbamidomethyl                        |
| AL1L1_MOUSE                  | IAVIGQSLFGQEVYCQLR      | [15] Carbamidomethyl                       |
| AL1L1_MOUSE                  | LRGEDGESECVINYVEK       | [10] Carbamidomethyl                       |
| AL1L1_MOUSE                  | SPLIIFADC DLNK          | [9] Carbamidomethyl                        |
| AL1L1_MOUSE                  | VPGAWTEACGQK            | [9] Carbamidomethyl                        |
| ANK3_MOUSE                   | DIEVLEGKPIYVDCYGNLAPLTK | [14] Carbamidomethyl                       |
| AP2A1_MOUSE                  | AADLLYAMCDR             | [9] Carbamidomethyl                        |
| AP2A1_MOUSE                  | ACNQLGQFLQHR            | [2] Carbamidomethyl                        |
| AP2A1_MOUSE                  | ALQVGCLLR               | [6] Carbamidomethyl                        |
| AP2A1_MOUSE                  | HLCELLAQQF              | [3] Carbamidomethyl                        |
| AP2A1_MOUSE                  | QSAALCLLR               | [6] Carbamidomethyl                        |
| AP2A1_MOUSE                  | TVFEALQAPACHENMVK       | [11] Carbamidomethyl                       |
| AP2A1_MOUSE                  | YLALESMTLASSEFSHEAVK    | [8] Carbamidomethyl                        |
| AP2B1_MOUSE                  | DVSSLFPDVVNCMQTDNLELK   | [12] Carbamidomethyl                       |
| AP2M1_MOUSE                  | IPTPLNTSGVQVICMK        | [14] Carbamidomethyl                       |
| AP2M1_MOUSE                  | MCDVMAAYFGK             | [2] Carbamidomethyl                        |
| AP2M1_MOUSE                  | QSIAIDDC TFHQCVR        | [8] Carbamidomethyl  [13] Carbamidomethyl  |
| AP2M1_MOUSE                  | SYLSGMPECK              | [9] Carbamidomethyl                        |

|             |                       |                                          |
|-------------|-----------------------|------------------------------------------|
| ASTN1_MOUSE | TLDSLQGCNEK           | [8] Carbamidomethyl                      |
| AT1A1_MOUSE | LIIVEGCQR             | [7] Carbamidomethyl                      |
| AT1A1_MOUSE | NIAFFSTNCVEGTAR       | [9] Carbamidomethyl                      |
| AT1A1_MOUSE | NLEAVETLGSTSTICSDK    | [15] Carbamidomethyl                     |
| AT1A2_MOUSE | CIELSCGSVR            | [1] Carbamidomethyl  [6] Carbamidomethyl |
| AT1A2_MOUSE | CSTILVQ GK            | [1] Carbamidomethyl                      |
| AT1A2_MOUSE | LCFVGLMSMIDPPR        | [2] Carbamidomethyl                      |
| AT1A2_MOUSE | LIIVEGCQR             | [7] Carbamidomethyl                      |
| AT1A2_MOUSE | NICFFSTNCVEGTAR       | [3] Carbamidomethyl  [9] Carbamidomethyl |
| AT1A2_MOUSE | NLEAVETLGSTSTICSDK    | [15] Carbamidomethyl                     |
| AT1A2_MOUSE | VLGFCQLNLP SGKFPR     | [5] Carbamidomethyl                      |
| AT1A3_MOUSE | ACVIHGTDLK            | [2] Carbamidomethyl                      |
| AT1A3_MOUSE | CATILLQ GK            | [1] Carbamidomethyl                      |
| AT1A3_MOUSE | CIELSSGSVK            | [1] Carbamidomethyl                      |
| AT1A3_MOUSE | KYNTDCVQGLTHSK        | [6] Carbamidomethyl                      |
| AT1A3_MOUSE | LIIVEGCQR             | [7] Carbamidomethyl                      |
| AT1A3_MOUSE | MSVEEVCRK             | [7] Carbamidomethyl                      |
| AT1A3_MOUSE | NITFFSTNCVEGTAR       | [9] Carbamidomethyl                      |
| AT1A3_MOUSE | NLEAVETLGSTSTICSDK    | [15] Carbamidomethyl                     |
| AT1A3_MOUSE | SPDCTHDNPLETR         | [4] Carbamidomethyl                      |
| AT1A3_MOUSE | SSHTWVALSHIAGLCNR     | [15] Carbamidomethyl                     |
| AT1A3_MOUSE | VLGFCHYYLP EEQFPK     | [5] Carbamidomethyl                      |
| AT1A3_MOUSE | YNTDCVQGLTHSK         | [5] Carbamidomethyl                      |
| AT1B1_MOUSE | DDMIFEDCGNVPSEPK      | [8] Carbamidomethyl                      |
| AT1B1_MOUSE | DSAQKDDMIFEDCGNVPSEPK | [13] Carbamidomethyl                     |
| AT1B1_MOUSE | YNPNVLPVQCTGK         | [10] Carbamidomethyl                     |
| AT1B2_MOUSE | FLNVTPNVEVNVECR       | [14] Carbamidomethyl                     |
| AT1B2_MOUSE | KSCGQVVEEWK           | [3] Carbamidomethyl                      |

|             |                            |                                                |
|-------------|----------------------------|------------------------------------------------|
| AT1B2_MOUSE | SCGQVVEEWK                 | [2] Carbamidomethyl                            |
| AT1B2_MOUSE | TQLGDCSGIGDPHYGYSTGQPCVFIK | [6] Carbamidomethyl  [23] Carbamidomethyl      |
| AT2B4_MOUSE | GADAVAQISAHYGGVQEICTR      | [19] Carbamidomethyl                           |
| AT2B4_MOUSE | HLDACETMGNATAICSDK         | [5] Carbamidomethyl  [15] Carbamidomethyl      |
| AT2B4_MOUSE | TECGLLGFVTDLK              | [3] Carbamidomethyl                            |
| ATPG_MOUSE  | GLCGAIHSSVAK               | [3] Carbamidomethyl                            |
| ATPO_MOUSE  | GEVPCTVTTASPLDDAVLSELK     | [5] Carbamidomethyl                            |
| CADM2_MOUSE | IIPSTPFQEGQALTLTCESK       | [18] Carbamidomethyl                           |
| CAPS1_MOUSE | HGMDEFISSNPCNFDHASLFEMVQR  | [12] Carbamidomethyl                           |
| CAPS1_MOUSE | IVYCTMEVEGGEK              | [4] Carbamidomethyl                            |
| CAPS1_MOUSE | KFEHQLLYNACQLDNPDEQAAQIR   | [11] Carbamidomethyl                           |
| CAPS1_MOUSE | LCSMEMGQEHQYHSK            | [2] Carbamidomethyl                            |
| CAPS1_MOUSE | LMASDMIESCVK               | [10] Carbamidomethyl                           |
| CATD_MOUSE  | AIGAVPLIQGEYMIPCEK         | [16] Carbamidomethyl                           |
| CATD_MOUSE  | GGCEAIVDTGTSLLVGPVEEVK     | [3] Carbamidomethyl                            |
| CATD_MOUSE  | ILDIACWVHHK                | [6] Carbamidomethyl                            |
| CBPE_MOUSE  | SGTAHEYSSCPDDAIFQSLAR      | [10] Carbamidomethyl                           |
| CD81_MOUSE  | NSLCPSGGNILTPLLQQDCHQK     | [4] Carbamidomethyl  [19] Carbamidomethyl      |
| CD81_MOUSE  | TFHETLNCCGSNALTTLTITLR     | [8] Carbamidomethyl  [9] Carbamidomethyl       |
| CISD1_MOUSE | KFPFCDGAHIK                | [5] Carbamidomethyl                            |
| CISY_MOUSE  | GYSIPECQK                  | [7] Carbamidomethyl                            |
| CLH1_MOUSE  | CNEPAVWSQLAK               | [1] Carbamidomethyl                            |
| CLH1_MOUSE  | EDKLECSEELGDLVK            | [6] Carbamidomethyl                            |
| CLH1_MOUSE  | EVCFACVDGK                 | [3] Carbamidomethyl  [6] Carbamidomethyl       |
| CLH1_MOUSE  | EVCFACVDGK                 | [3] Nethylmaleimide+water  [6] Carbamidomethyl |
| CLH1_MOUSE  | EVCFACVDGK                 | [3] Carbamidomethyl  [6] Nethylmaleimide+water |
| CLH1_MOUSE  | GQCDLELINVCNENSLFK         | [3] Carbamidomethyl  [11] Carbamidomethyl      |
| CLH1_MOUSE  | HSSLAGCQIINYR              | [7] Carbamidomethyl                            |

|             |                         |                                          |
|-------------|-------------------------|------------------------------------------|
| CLH1_MOUSE  | IHEGCEEPATHNALAK        | [5] Carbamidomethyl                      |
| CLH1_MOUSE  | LECSEELGDLVK            | [3] Carbamidomethyl                      |
| CLH1_MOUSE  | RDPHLACVAYER            | [7] Carbamidomethyl                      |
| CLH1_MOUSE  | VIQCFAETGQVQK           | [4] Carbamidomethyl                      |
| CLH1_MOUSE  | YESLELCRPVLQQGR         | [7] Carbamidomethyl                      |
| CRIP2_MOUSE | ASSVTFTGEPNMCPR         | [14] Carbamidomethyl                     |
| CSPG2_MOUSE | FTFEEAEAECTSR           | [10] Carbamidomethyl                     |
| CTNA2_MOUSE | LESIISGAALMADSSCTR      | [16] Carbamidomethyl                     |
| CYFP1_MOUSE | DCPDNAEEYER             | [2] Carbamidomethyl                      |
| DCE1_MOUSE  | NLLSCENSDDQGAR          | [5] Carbamidomethyl                      |
| DCE2_MOUSE  | LCALLYGDSGKPAEGGGSVTSR  | [2] Carbamidomethyl                      |
| DCE2_MOUSE  | MMGVPLQCSALLVR          | [8] Carbamidomethyl                      |
| DCTN1_MOUSE | QSCTILISTMNK            | [3] Carbamidomethyl                      |
| DMXL2_MOUSE | EIAALHEICNHESVIK        | [9] Carbamidomethyl                      |
| DMXL2_MOUSE | VGCPVLALEVLISK          | [3] Carbamidomethyl                      |
| DMXL2_MOUSE | VINLSQYGPACFGQEHR       | [11] Carbamidomethyl                     |
| DPP6_MOUSE  | GENQGQTFTCGSALSPITDFK   | [10] Carbamidomethyl                     |
| DYL2_MOUSE  | KYNPTWHCIVGR            | [8] Carbamidomethyl                      |
| DYL2_MOUSE  | NADMSEDMQQDAVDCATQAMEK  | [15] Carbamidomethyl                     |
| DYN1_MOUSE  | ENCLILAVSPANSDLANSDALK  | [3] Carbamidomethyl                      |
| DYN1_MOUSE  | QLELACETQEEVDSWK        | [6] Carbamidomethyl                      |
| ENTP2_MOUSE | AGQSLVECLEQALR          | [8] Carbamidomethyl                      |
| FAS_MOUSE   | ACVDTALENLSTLK          | [2] Carbamidomethyl                      |
| FAS_MOUSE   | FVFTPHMEAELSESTALQK     | [11] Carbamidomethyl                     |
| FAS_MOUSE   | GYDYGPQFQGICEATLEGEQ GK | [12] Carbamidomethyl                     |
| FAS_MOUSE   | LGMLSPDGTCTCR           | [10] Carbamidomethyl                     |
| FAS_MOUSE   | SSCTIIPLMK              | [3] Carbamidomethyl                      |
| GABR2_MOUSE | VFCCAFEESMFGSK          | [3] Carbamidomethyl  [4] Carbamidomethyl |

|             |                          |                                                                                     |
|-------------|--------------------------|-------------------------------------------------------------------------------------|
| GBB2_MOUSE  | ACGDSTLTQITAGLDPVGR      | [2] Carbamidomethyl                                                                 |
| GBB2_MOUSE  | ELPGHTGYLSCCR            | [11] Carbamidomethyl [[12] Carbamidomethyl                                          |
| GBB2_MOUSE  | KACGDSTLTQITAGLDPVGR     | [3] Carbamidomethyl                                                                 |
| GBB2_MOUSE  | TFVSGACDASIK             | [7] Carbamidomethyl                                                                 |
| GBB2_MOUSE  | VSCLGVTTDDGMAVATGSWDSFLK | [3] Carbamidomethyl                                                                 |
| GBRG2_MOUSE | DCASFFCCFEDCR            | [2] Carbamidomethyl [[7] Carbamidomethyl [[8] Carbamidomethyl [[12] Carbamidomethyl |
| GNAI1_MOUSE | DSGVQACFNR               | [7] Carbamidomethyl                                                                 |
| GNAI1_MOUSE | EIYTHFTCATDTK            | [8] Carbamidomethyl                                                                 |
| GNAI1_MOUSE | IIHEAGYSEEECK            | [12] Carbamidomethyl                                                                |
| GNAI1_MOUSE | LFDSICNNK                | [6] Carbamidomethyl                                                                 |
| GNAI2_MOUSE | EIYTHFTCATDTK            | [8] Carbamidomethyl                                                                 |
| GNAI2_MOUSE | IIHEDGYSEEECR            | [12] Carbamidomethyl                                                                |
| GNAI2_MOUSE | LFDSICNNK                | [6] Carbamidomethyl                                                                 |
| GNAI2_MOUSE | LWADHGVQACFGR            | [10] Carbamidomethyl                                                                |
| GNAI2_MOUSE | RLWADHGVQACFGR           | [11] Carbamidomethyl                                                                |
| GNAO_MOUSE  | LWGDSGIQECFNR            | [10] Carbamidomethyl                                                                |
| GNAO_MOUSE  | MHESLMLFDSICNNK          | [12] Carbamidomethyl                                                                |
| GNAO_MOUSE  | MVCDVVSR                 | [3] Carbamidomethyl                                                                 |
| GNAQ_MOUSE  | IIYSHFTCATDTENIR         | [8] Carbamidomethyl                                                                 |
| GNAQ_MOUSE  | SLWNDPGIQECYDR           | [11] Carbamidomethyl                                                                |
| GNAQ_MOUSE  | TLESIMACCLSEEAK          | [8] Carbamidomethyl [[9] Carbamidomethyl                                            |
| GNAZ_MOUSE  | LWADPGAQACFGR            | [10] Carbamidomethyl                                                                |
| GPM6A_MOUSE | ICTASENFLR               | [2] Carbamidomethyl                                                                 |
| GPM6A_MOUSE | KICTASENFLR              | [3] Carbamidomethyl                                                                 |
| GRIA1_MOUSE | GFCLIPQQSINEAIR          | [3] Carbamidomethyl                                                                 |
| GRIA1_MOUSE | RGNAGDCLANPAVPWGQGIDIQR  | [7] Carbamidomethyl                                                                 |
| GRIA2_MOUSE | RGNAGDCLANPAVPWGQGVIEIR  | [7] Carbamidomethyl                                                                 |
| HS12A_MOUSE | EPECIHVMR                | [4] Carbamidomethyl                                                                 |

|             |                                |                                          |
|-------------|--------------------------------|------------------------------------------|
| HSP74_MOUSE | GCALQCAILSPA FK                | [2] Carbamidomethyl  [6] Carbamidomethyl |
| HSP74_MOUSE | SVMDATQIAGLNCLR                | [13] Carbamidomethyl                     |
| HXK1_MOUSE  | AAQLCGAGMAAVVEK                | [5] Carbamidomethyl                      |
| HXK1_MOUSE  | AILQQLGLNSTCDD SILVK           | [12] Carbamidomethyl                     |
| HXK1_MOUSE  | ATDCVGH DVATLLR                | [4] Carbamidomethyl                      |
| HXK1_MOUSE  | KLPVGF TFSFPCR                 | [12] Carbamidomethyl                     |
| HXK1_MOUSE  | MPLGFTFSFPCK                   | [11] Carbamidomethyl                     |
| IMPA1_MOUSE | YPCHSFIGEESVAAGEK              | [3] Carbamidomethyl                      |
| KCRB_MOUSE  | FCTGLTQIETLFK                  | [2] Carbamidomethyl                      |
| KI21A_MOUSE | TVNTEPEMMQCLK                  | [11] Carbamidomethyl                     |
| KIF5C_MOUSE | SLEPCDNTPIIDNITPVVDGISA EK     | [5] Carbamidomethyl                      |
| LDHB_MOUSE  | VIGSGCNLDSAR                   | [6] Carbamidomethyl                      |
| LETM1_MOUSE | GEEITKEEIDILSDACSK             | [16] Carbamidomethyl                     |
| LGI1_MOUSE  | DFDCIITEFAK                    | [4] Carbamidomethyl                      |
| LIS1_MOUSE  | LLASCSADMTIK                   | [5] Carbamidomethyl                      |
| LIS1_MOUSE  | MVRPNQDGTLIASCSNDQTVR          | [14] Carbamidomethyl                     |
| LRRC7_MOUSE | SMCAPLPVAAQSTTLPSLSGR          | [3] Carbamidomethyl                      |
| MIA40_MOUSE | GSDCIDQFR                      | [4] Carbamidomethyl                      |
| MPP2_MOUSE  | DLELTPTSGTLCGSLSGK             | [12] Carbamidomethyl                     |
| MPP2_MOUSE  | RDLELTPTSGTLCGSLSGKK           | [13] Carbamidomethyl                     |
| MPP2_MOUSE  | VCVLDVNPQAVK                   | [2] Carbamidomethyl                      |
| MPP6_MOUSE  | DWDNSGPF CGTISNK               | [9] Carbamidomethyl                      |
| MPP6_MOUSE  | TCILDVNPQALK                   | [2] Carbamidomethyl                      |
| NDUS1_MOUSE | DCFIVYQGHGHDVGP MADVILPGAAYTEK | [2] Carbamidomethyl                      |
| NDUS1_MOUSE | DLLNKVDS DNLCTEEIFPTEGAGTDLR   | [12] Carbamidomethyl                     |
| NDUS1_MOUSE | MCLVEIEK                       | [2] Carbamidomethyl                      |
| NDUS1_MOUSE | MLFLLGADGGCITR                 | [11] Carbamidomethyl                     |
| NDUS1_MOUSE | VSDNLCTEEIFPTEGAGTDLR          | [7] Carbamidomethyl                      |

|             |                              |                                           |
|-------------|------------------------------|-------------------------------------------|
| NFASC_MOUSE | DNILIECEAK                   | [7] Carbamidomethyl                       |
| NFASC_MOUSE | DQGSYTCMASTELDQDLAK          | [7] Carbamidomethyl                       |
| NFASC_MOUSE | ITNVSEEDSGEYFCLASNK          | [14] Carbamidomethyl                      |
| NFASC_MOUSE | LDCPFFGSPITLR                | [3] Carbamidomethyl                       |
| NFASC_MOUSE | SGGRPEEYEGEYQCFAR            | [14] Carbamidomethyl                      |
| NFASC_MOUSE | TRLDPCFFGSPITLR              | [5] Carbamidomethyl                       |
| NRCAM_MOUSE | AETYEGVYQCTAR                | [10] Carbamidomethyl                      |
| NRCAM_MOUSE | DSTGTYTCVAR                  | [8] Carbamidomethyl                       |
| NRCAM_MOUSE | TLQITHVSEADSGNYQCIK          | [17] Carbamidomethyl                      |
| NSF_MOUSE   | CPTDELSLSNCAVVNEK            | [1] Carbamidomethyl  [11] Carbamidomethyl |
| NSF_MOUSE   | GILLYGPPGCGK                 | [10] Carbamidomethyl                      |
| NSF_MOUSE   | SQLSCVVDDIER                 | [5] Carbamidomethyl                       |
| NSF_MOUSE   | THPSVVPGCIAFSLPQR            | [9] Carbamidomethyl                       |
| NSF_MOUSE   | VFPPEIVEQMGCK                | [12] Carbamidomethyl                      |
| NTRI_MOUSE  | EQSGEYECASNDVAAPVVR          | [8] Carbamidomethyl                       |
| NTRI_MOUSE  | GTLQCEASAVPSAEFQWFK          | [5] Carbamidomethyl                       |
| ODO1_MOUSE  | AEQFYCGDTEGK                 | [6] Carbamidomethyl                       |
| ODO1_MOUSE  | DVVVDLVCYR                   | [8] Carbamidomethyl                       |
| ODO1_MOUSE  | ELEQIFCQFDSKLEAADEGSGDMK     | [7] Carbamidomethyl                       |
| ODO1_MOUSE  | FGLEGCEVLIPALK               | [6] Carbamidomethyl                       |
| ODO1_MOUSE  | ICEEAFTR                     | [2] Carbamidomethyl                       |
| ODO1_MOUSE  | RFGLEGCEVLIPALK              | [7] Carbamidomethyl                       |
| ODO1_MOUSE  | SMTCPSTGLEEDVLFHIGHK         | [4] Carbamidomethyl                       |
| ODO1_MOUSE  | SMTCPSTGLEEDVLFHIGHK         | [2] Oxidation (M) [4] Carbamidomethyl     |
| ODO1_MOUSE  | VVNAPIFHVNSDDPEAVMYVCK       | [21] Carbamidomethyl                      |
| ODO1_MOUSE  | YPNAELAWCQEEHK               | [9] Carbamidomethyl                       |
| ODPX_MOUSE  | DVSAPPPVSKPPAPTQPSPQPQIPCPAR | [25] Carbamidomethyl                      |
| ODPX_MOUSE  | STVPHAYATADCDLGAVLK          | [12] Carbamidomethyl                      |

|             |                            |                                                                |
|-------------|----------------------------|----------------------------------------------------------------|
| OPA1_MOUSE  | EGCTVSPETISLNVK            | [3] Carbamidomethyl                                            |
| PCCA_MOUSE  | MADEAVCVGPAPTSK            | [7] Carbamidomethyl                                            |
| PDE2A_MOUSE | ATDQVVALACAFNK             | [10] Carbamidomethyl                                           |
| PDE2A_MOUSE | LVCEDPPHELPPQEGK           | [3] Carbamidomethyl                                            |
| PI4KA_MOUSE | ICWQAAIFK                  | [2] Carbamidomethyl                                            |
| PI4KA_MOUSE | QNTTLGATQLTERPACVK         | [16] Carbamidomethyl                                           |
| PLCB1_MOUSE | EVIEAIAECAFK               | [9] Carbamidomethyl                                            |
| PLCB1_MOUSE | LTDVAEECCQNNQLK            | [8] Carbamidomethyl                                            |
| PLCB1_MOUSE | RVETALEACSLPSSR            | [9] Carbamidomethyl                                            |
| PLCB1_MOUSE | VVLPSLACLR                 | [8] Carbamidomethyl                                            |
| PLPR4_MOUSE | NAEGSTVTCTGSIR             | [9] Carbamidomethyl                                            |
| PP2BA_MOUSE | FKEPPAYGPMCDILWSDPLEDFGNEK | [11] Carbamidomethyl                                           |
| PRDX6_MOUSE | DFTPVCCTELGR               | [6] Carbamidomethyl                                            |
| PTPRD_MOUSE | TATMLCAASGNPDPEITWFK       | [6] Carbamidomethyl                                            |
| PTPRD_MOUSE | TPVDQTGVSQGVASFICQATGDPRPK | [17] Carbamidomethyl                                           |
| PTPRD_MOUSE | VCLQPIR                    | [2] Carbamidomethyl                                            |
| PTPRD_MOUSE | YECVATNSAGTR               | [3] Carbamidomethyl                                            |
| PTPRS_MOUSE | TATMLCAASGNPDPEITWFK       | [6] Carbamidomethyl                                            |
| PTPRS_MOUSE | VCLQPIR                    | [2] Carbamidomethyl                                            |
| PYGB_MOUSE  | TCAYTNHTVLPEALER           | [2] Carbamidomethyl                                            |
| PYGB_MOUSE  | TCFETFPDK                  | [2] Carbamidomethyl                                            |
| RAP2B_MOUSE | ALAEWWSQPFMETSAAK          | [8] Carbamidomethyl                                            |
| RASH_MOUSE  | LNPPDESGPGCMSCK            | [11] Carbamidomethyl [[14] Carbamidomethyl                     |
| RHOG_MOUSE  | YLECSALQQDGVK              | [4] Carbamidomethyl                                            |
| S39AC_MOUSE | YFGTSSSQCMETK              | [9] Carbamidomethyl                                            |
| SAHH2_MOUSE | LCVPAMNVNDSVTK             | [2] Carbamidomethyl                                            |
| SC6A1_MOUSE | QCDNPWNTDR                 | [2] Carbamidomethyl                                            |
| SDHB_MOUSE  | CHTIMNCTQTCPK              | [1] Carbamidomethyl [[7] Carbamidomethyl [[11] Carbamidomethyl |



|             |                           |                      |
|-------------|---------------------------|----------------------|
| SEPT8_MOUSE | ELEEETNAFNCR              | [11] Carbamidomethyl |
| SEPT8_MOUSE | QYPWGVVQVENENHCDFVK       | [15] Carbamidomethyl |
| SEPT8_MOUSE | RRELEEETNAFNCR            | [13] Carbamidomethyl |
| SEPT8_MOUSE | STLMNTLFNTTFETEEASHHEECVR | [23] Carbamidomethyl |
| SRBS2_MOUSE | DLMNSEVICSVK              | [9] Carbamidomethyl  |
| SSDH_MOUSE  | EVGEVLCTDPLVSK            | [7] Carbamidomethyl  |
| SSDH_MOUSE  | LGTVADCGVPEAR             | [7] Carbamidomethyl  |
| STXB1_MOUSE | AAHVFFTDSCPDALFNELVK      | [10] Carbamidomethyl |
| STXB1_MOUSE | LAEQIATLCATLK             | [9] Carbamidomethyl  |
| STXB1_MOUSE | YSTHLHLAEDCMK             | [11] Carbamidomethyl |
| SYIM_MOUSE  | VHFVPGWDCHGLPIETK         | [9] Carbamidomethyl  |
| SYNJ1_MOUSE | TSPCQSPTVPEYSAPSLPIRPSR   | [4] Carbamidomethyl  |
| SYNPR_MOUSE | EVLILLMSACK               | [9] Carbamidomethyl  |
| SYNPR_MOUSE | LQQVTFEVPTCEGK            | [11] Carbamidomethyl |
| SYT2_MOUSE  | LGDICTSLR                 | [5] Carbamidomethyl  |
| SYT2_MOUSE  | LTVCILEAK                 | [4] Carbamidomethyl  |
| TERA_MOUSE  | AIANECQANFISIK            | [6] Carbamidomethyl  |
| TERA_MOUSE  | LGDVISIQPCPDVK            | [10] Carbamidomethyl |
| TERA_MOUSE  | QAAPCVLFFDELDSIAK         | [5] Carbamidomethyl  |
| THY1_MOUSE  | VTSLTACLNVQNLNR           | [7] Carbamidomethyl  |
| UBA1_MOUSE  | DNPGVVTCLDEAR             | [8] Carbamidomethyl  |
| VA0D1_MOUSE | NIVWIAECIAQR              | [8] Carbamidomethyl  |
| VDAC2_MOUSE | SCSGVEFSTSGSSNTDTGK       | [2] Carbamidomethyl  |
| VDAC2_MOUSE | WCEYGLTFTEK               | [2] Carbamidomethyl  |
| VGLU2_MOUSE | ILQGLVEGVITYPACHGIWSK     | [14] Carbamidomethyl |
