# Supplementary material for: Identification of substrates of palmitoyl protein thioesterase 1 highlights roles of depalmitoylation in disulfide bond formation and synaptic function
Source: PubMed Central journal article supplement (PMC9004782; doi:10.1371/journal.pbio.3001590), 2022-03-31
Supplement: pbio.3001590.s005.pdf [file pbio.3001590.s005.pdf]

**S4 Table. Residual PPT1 substrates.** Proteins identified in the secondary validation screen that were not identified as putative substrates in the primary screen.

| <b>Uniprot ID</b> | <b>Gene Name</b> |
|-------------------|------------------|
| 1433E_MOUSE       | <i>Ywhae</i>     |
| 1433F_MOUSE       | <i>Ywhah</i>     |
| 1433G_MOUSE       | <i>Ywhag</i>     |
| 1433S_MOUSE       | <i>Sfn</i>       |
| 1433T_MOUSE       | <i>Ywhaq</i>     |
| 1433Z_MOUSE       | <i>Ywhaz</i>     |
| 2A5E_MOUSE        | <i>Ppp2r5e</i>   |
| 2AAA_MOUSE        | <i>Ppp2r1a</i>   |
| 2AAB_MOUSE        | <i>Ppp2r1b</i>   |
| 2ABA_MOUSE        | <i>Ppp2r2a</i>   |
| 2ABB_MOUSE        | <i>Ppp2r2b</i>   |
| 2ABD_MOUSE        | <i>Ppp2r2d</i>   |
| 2ABG_MOUSE        | <i>Ppp2r2c</i>   |
| 3HIDH_MOUSE       | <i>Hibadh</i>    |
| 4F2_MOUSE         | <i>Slc3a2</i>    |
| A2MG_MOUSE        | <i>A2m</i>       |
| A4_MOUSE          | <i>App</i>       |
| AAK1_MOUSE        | <i>Aak1</i>      |
| AATC_MOUSE        | <i>Got1</i>      |
| AATM_MOUSE        | <i>Got2</i>      |
| ACAD9_MOUSE       | <i>Acad9</i>     |
| ACADL_MOUSE       | <i>Acadl</i>     |
| ACADM_MOUSE       | <i>Acadm</i>     |
| ACADV_MOUSE       | <i>Acadvl</i>    |
| ACLY_MOUSE        | <i>Acly</i>      |
| ACO10_MOUSE       | <i>Acot10</i>    |
| ACO13_MOUSE       | <i>Acot13</i>    |
| ACOT9_MOUSE       | <i>Acot9</i>     |
| ACPM_MOUSE        | <i>Ndufab1</i>   |
| ACSL6_MOUSE       | <i>Acsl6</i>     |
| ACTA_MOUSE        | <i>Acta2</i>     |
| ACTB_MOUSE        | <i>Actb</i>      |
| ACTC_MOUSE        | <i>Actc1</i>     |
| ACTN2_MOUSE       | <i>Actn2</i>     |
| ACTN4_MOUSE       | <i>Actn4</i>     |
| ACYP1_MOUSE       | <i>Acyp1</i>     |

|             |                |
|-------------|----------------|
| ADA22_MOUSE | <i>Adam22</i>  |
| ADA23_MOUSE | <i>Adam23</i>  |
| ADDA_MOUSE  | <i>Add1</i>    |
| ADDB_MOUSE  | <i>Add2</i>    |
| ADT1_MOUSE  | <i>Slc25a4</i> |
| ADT2_MOUSE  | <i>Slc25a5</i> |
| AFG2H_MOUSE | <i>Spata5</i>  |
| AFG32_MOUSE | <i>Afg3l2</i>  |
| AGFG1_MOUSE | <i>Agfg1</i>   |
| AGK_MOUSE   | <i>Agk</i>     |
| AHSA1_MOUSE | <i>Ahsa1</i>   |
| AINX_MOUSE  | <i>Ina</i>     |
| AK1A1_MOUSE | <i>Akr1a1</i>  |
| AKAP5_MOUSE | <i>Akap5</i>   |
| AL1B1_MOUSE | <i>Aldh1b1</i> |
| AL7A1_MOUSE | <i>Aldh7a1</i> |
| ALBU_MOUSE  | <i>Alb</i>     |
| ALDH2_MOUSE | <i>Aldh2</i>   |
| ALDOA_MOUSE | <i>Aldoa</i>   |
| ALDOC_MOUSE | <i>Aldoc</i>   |
| AMPH_MOUSE  | <i>Amph</i>    |
| AMPL_MOUSE  | <i>Lap3</i>    |
| AMRP_MOUSE  | <i>Lrpap1</i>  |
| ANK2_MOUSE  | <i>Ank2</i>    |
| ANS1B_MOUSE | <i>Anks1b</i>  |
| ANXA5_MOUSE | <i>Anxa5</i>   |
| ANXA6_MOUSE | <i>Anxa6</i>   |
| ANXA7_MOUSE | <i>Anxa7</i>   |
| AOFB_MOUSE  | <i>Maob</i>    |
| AP180_MOUSE | <i>Snap91</i>  |
| AP1B1_MOUSE | <i>Ap1b1</i>   |
| AP2A2_MOUSE | <i>Ap2a2</i>   |
| AP2S1_MOUSE | <i>Ap2s1</i>   |
| AP3B2_MOUSE | <i>Ap3b2</i>   |
| AP3D1_MOUSE | <i>Ap3d1</i>   |
| AP3M2_MOUSE | <i>Ap3m2</i>   |
| APOE_MOUSE  | <i>Apoe</i>    |
| ARC1A_MOUSE | <i>Arpc1a</i>  |
| ARF1_MOUSE  | <i>Arf1</i>    |

|             |                |
|-------------|----------------|
| ARF2_MOUSE  | <i>Arf2</i>    |
| ARF5_MOUSE  | <i>Arf5</i>    |
| ARFG1_MOUSE | <i>Arfgap1</i> |
| ARM10_MOUSE | <i>Armc10</i>  |
| ARMC1_MOUSE | <i>Armc1</i>   |
| ARP2_MOUSE  | <i>Actr2</i>   |
| ARP3_MOUSE  | <i>Actr3</i>   |
| ARP3B_MOUSE | <i>Actr3b</i>  |
| ARP5L_MOUSE | <i>Arpc5l</i>  |
| ARPC2_MOUSE | <i>Arpc2</i>   |
| ARPC3_MOUSE | <i>Arpc3</i>   |
| ARPC4_MOUSE | <i>Arpc4</i>   |
| ARPC5_MOUSE | <i>Arpc5</i>   |
| ARSB_MOUSE  | <i>Arsb</i>    |
| ASGL1_MOUSE | <i>Asrgl1</i>  |
| ASNA_MOUSE  | <i>Asna1</i>   |
| ASSY_MOUSE  | <i>Ass1</i>    |
| AT2A1_MOUSE | <i>Atp2a1</i>  |
| AT2A2_MOUSE | <i>Atp2a2</i>  |
| AT2B1_MOUSE | <i>Atp2b1</i>  |
| AT2B2_MOUSE | <i>Atp2b2</i>  |
| AT5F1_MOUSE | <i>Atp5pb</i>  |
| AT8A1_MOUSE | <i>Atp8a1</i>  |
| ATIF1_MOUSE | <i>ATP5IF1</i> |
| ATLA1_MOUSE | <i>Atl1</i>    |
| ATP5H_MOUSE | <i>Atp5pd</i>  |
| ATP5L_MOUSE | <i>Atp5mg</i>  |
| ATPA_MOUSE  | <i>Atp5f1a</i> |
| ATPB_MOUSE  | <i>Atp5f1b</i> |
| ATPD_MOUSE  | <i>Atp5f1d</i> |
| ATPK_MOUSE  | <i>Atp5mf</i>  |
| ATPMD_MOUSE | <i>Atp5md</i>  |
| AUHM_MOUSE  | <i>Auh</i>     |
| AUXI_MOUSE  | <i>Dnajc6</i>  |
| B2L13_MOUSE | <i>Bcl2l13</i> |
| BACH_MOUSE  | <i>Acot7</i>   |
| BASP1_MOUSE | <i>Basp1</i>   |
| BCAS1_MOUSE | <i>Bcas1</i>   |
| BCS1_MOUSE  | <i>Bcs1l</i>   |

|             |                 |
|-------------|-----------------|
| BDH_MOUSE   | <i>Bdh1</i>     |
| BIN1_MOUSE  | <i>Bin1</i>     |
| BIN2_MOUSE  | <i>Bin2</i>     |
| BIP_MOUSE   | <i>Hspa5</i>    |
| BORG4_MOUSE | <i>Cdc42ep4</i> |
| BPHL_MOUSE  | <i>Bphl</i>     |
| BSN_MOUSE   | <i>Bsn</i>      |
| C1QBP_MOUSE | <i>C1qbp</i>    |
| C1TM_MOUSE  | <i>Mthfd1l</i>  |
| C2C2L_MOUSE | <i>C2cd2l</i>   |
| CAD13_MOUSE | <i>Cdh13</i>    |
| CADH2_MOUSE | <i>Cdh2</i>     |
| CADM1_MOUSE | <i>Cadm1</i>    |
| CADM3_MOUSE | <i>Cadm3</i>    |
| CADM4_MOUSE | <i>Cadm4</i>    |
| CAH2_MOUSE  | <i>Ca2</i>      |
| CALB1_MOUSE | <i>Calb1</i>    |
| CALB2_MOUSE | <i>Calb2</i>    |
| CALL3_MOUSE | <i>Calml3</i>   |
| CALM1_MOUSE | <i>Calm1</i>    |
| CALR_MOUSE  | <i>Calr</i>     |
| CALU_MOUSE  | <i>Calu</i>     |
| CALX_MOUSE  | <i>Canx</i>     |
| CAMKV_MOUSE | <i>Camkv</i>    |
| CANB1_MOUSE | <i>Ppp3r1</i>   |
| CAND1_MOUSE | <i>Cand1</i>    |
| CAP1_MOUSE  | <i>Cap1</i>     |
| CAP2_MOUSE  | <i>Cap2</i>     |
| CAPZB_MOUSE | <i>Capzb</i>    |
| CATB_MOUSE  | <i>Ctsb</i>     |
| CAZA1_MOUSE | <i>Capza1</i>   |
| CAZA2_MOUSE | <i>Capza2</i>   |
| CBR1_MOUSE  | <i>Cbr1</i>     |
| CC136_MOUSE | <i>Ccdc136</i>  |
| CC50A_MOUSE | <i>Tmem30a</i>  |
| CC50B_MOUSE | <i>Tmem30b</i>  |
| CD166_MOUSE | <i>Alcam</i>    |
| CDC37_MOUSE | <i>Cdc37</i>    |
| CDC42_MOUSE | <i>Cdc42</i>    |

|             |                 |
|-------------|-----------------|
| CEND_MOUSE  | <i>Cend1</i>    |
| CH10_MOUSE  | <i>Hspe1</i>    |
| CH60_MOUSE  | <i>Hspd1</i>    |
| CHP1_MOUSE  | <i>Chp1</i>     |
| CLAP2_MOUSE | <i>Clasp2</i>   |
| CLCA_MOUSE  | <i>Clta</i>     |
| CLCB_MOUSE  | <i>Cltb</i>     |
| CLD11_MOUSE | <i>Cldn11</i>   |
| CLIC4_MOUSE | <i>Clic4</i>    |
| CMC1_MOUSE  | <i>Slc25a12</i> |
| CMTD1_MOUSE | <i>Comtd1</i>   |
| CN37_MOUSE  | <i>Cnp</i>      |
| CNRP1_MOUSE | <i>Cnrip1</i>   |
| CNTN1_MOUSE | <i>Cntn1</i>    |
| CNTN2_MOUSE | <i>Cntn2</i>    |
| CNTP2_MOUSE | <i>Cntnap2</i>  |
| CO1A1_MOUSE | <i>Col1a1</i>   |
| CO3_MOUSE   | <i>C3</i>       |
| CO4B_MOUSE  | <i>C4b</i>      |
| COF1_MOUSE  | <i>Cfl1</i>     |
| COQ9_MOUSE  | <i>Coq9</i>     |
| COR1A_MOUSE | <i>Coro1a</i>   |
| COR1B_MOUSE | <i>Coro1b</i>   |
| COR1C_MOUSE | <i>Coro1c</i>   |
| COX5A_MOUSE | <i>Cox5a</i>    |
| COX5B_MOUSE | <i>Cox5b</i>    |
| CPLX1_MOUSE | <i>Cplx1</i>    |
| CPLX2_MOUSE | <i>Cplx2</i>    |
| CPLX3_MOUSE | <i>Cplx3</i>    |
| CPNE6_MOUSE | <i>Cpne6</i>    |
| CRK_MOUSE   | <i>Crk</i>      |
| CRKL_MOUSE  | <i>Crkl</i>     |
| CRYAB_MOUSE | <i>Cryab</i>    |
| CRYM_MOUSE  | <i>Crym</i>     |
| CSK21_MOUSE | <i>Csnk2a1</i>  |
| CSK2B_MOUSE | <i>Csnk2b</i>   |
| CSK11_MOUSE | <i>Caskin1</i>  |
| CSN1_MOUSE  | <i>Gps1</i>     |
| CSN2_MOUSE  | <i>Cops2</i>    |

|             |                 |
|-------------|-----------------|
| CSN4_MOUSE  | <i>Cops4</i>    |
| CSPG5_MOUSE | <i>Cspg5</i>    |
| CSRP1_MOUSE | <i>Csrp1</i>    |
| CTBP1_MOUSE | <i>Ctbp1</i>    |
| CTNB1_MOUSE | <i>Ctnnb1</i>   |
| CTND2_MOUSE | <i>Ctnnd2</i>   |
| CTTB2_MOUSE | <i>Cttnbp2</i>  |
| CX6B1_MOUSE | <i>Cox6b1</i>   |
| CY1_MOUSE   | <i>Cyc1</i>     |
| CYC_MOUSE   | <i>Cycs</i>     |
| CYC2_MOUSE  | <i>Cyct</i>     |
| CYFP2_MOUSE | <i>Cyfip2</i>   |
| DBNL_MOUSE  | <i>Dbnl</i>     |
| DC1I1_MOUSE | <i>Dync1i1</i>  |
| DC1I2_MOUSE | <i>Dync1i2</i>  |
| DC1L1_MOUSE | <i>Dync1li1</i> |
| DCTN2_MOUSE | <i>Dctn2</i>    |
| DDAH1_MOUSE | <i>Ddah1</i>    |
| DECR_MOUSE  | <i>Decr1</i>    |
| DEMA_MOUSE  | <i>Dmtn</i>     |
| DESM_MOUSE  | <i>Des</i>      |
| DHE3_MOUSE  | <i>Glud1</i>    |
| DHPR_MOUSE  | <i>Qdpr</i>     |
| DIRA2_MOUSE | <i>Diras2</i>   |
| DLDH_MOUSE  | <i>Dld</i>      |
| DLG1_MOUSE  | <i>Dlg1</i>     |
| DLG2_MOUSE  | <i>Dlg2</i>     |
| DLG3_MOUSE  | <i>Dlg3</i>     |
| DLG4_MOUSE  | <i>Dlg4</i>     |
| DLGP4_MOUSE | <i>Dlgap4</i>   |
| DMXL1_MOUSE | <i>Dmxl1</i>    |
| DNM1L_MOUSE | <i>Dnm1l</i>    |
| DOC2B_MOUSE | <i>Doc2b</i>    |
| DOPD_MOUSE  | <i>Ddt</i>      |
| DPP10_MOUSE | <i>Dpp10</i>    |
| DPYL1_MOUSE | <i>Crmp1</i>    |
| DPYL2_MOUSE | <i>Dpysl2</i>   |
| DPYL3_MOUSE | <i>Dpysl3</i>   |
| DPYL4_MOUSE | <i>Dpysl4</i>   |

|             |                |
|-------------|----------------|
| DPYL5_MOUSE | <i>Dpysl5</i>  |
| DREB_MOUSE  | <i>Dbn1</i>    |
| DUS3_MOUSE  | <i>Dusp3</i>   |
| DYHC1_MOUSE | <i>Dync1h1</i> |
| DYN3_MOUSE  | <i>Dnm3</i>    |
| E41L1_MOUSE | <i>Epb4111</i> |
| E41L2_MOUSE | <i>Epb4112</i> |
| E41L3_MOUSE | <i>Epb4113</i> |
| EAA1_MOUSE  | <i>Slc1a3</i>  |
| EAA2_MOUSE  | <i>Slc1a2</i>  |
| ECHA_MOUSE  | <i>Hadha</i>   |
| ECHB_MOUSE  | <i>Hadhb</i>   |
| ECHM_MOUSE  | <i>Echs1</i>   |
| EF1A1_MOUSE | <i>Eef1a1</i>  |
| EF1A2_MOUSE | <i>Eef1a2</i>  |
| EF1G_MOUSE  | <i>Eef1g</i>   |
| EF2_MOUSE   | <i>Eef2</i>    |
| EFHD1_MOUSE | <i>Efhd1</i>   |
| EFHD2_MOUSE | <i>Efhd2</i>   |
| EHD1_MOUSE  | <i>Ehd1</i>    |
| EHD3_MOUSE  | <i>Ehd3</i>    |
| ELMO2_MOUSE | <i>Elmo2</i>   |
| ENOA_MOUSE  | <i>Eno1</i>    |
| ENOG_MOUSE  | <i>Eno2</i>    |
| ENPL_MOUSE  | <i>Hsp90b1</i> |
| EPN1_MOUSE  | <i>Epn1</i>    |
| ERC2_MOUSE  | <i>Erc2</i>    |
| ERMIN_MOUSE | <i>Ertn</i>    |
| ERP44_MOUSE | <i>Erp44</i>   |
| ETFA_MOUSE  | <i>Etfa</i>    |
| ETFB_MOUSE  | <i>Etfb</i>    |
| ETFD_MOUSE  | <i>Etfdh</i>   |
| EXOG_MOUSE  | <i>Exog</i>    |
| EZRI_MOUSE  | <i>Ezr</i>     |
| FABP5_MOUSE | <i>Fabp5</i>   |
| FABPH_MOUSE | <i>Fabp3</i>   |
| FAHD2_MOUSE | <i>Fahd2</i>   |
| FKB1A_MOUSE | <i>Fkbp1a</i>  |
| FKBP2_MOUSE | <i>Fkbp2</i>   |

|             |                 |
|-------------|-----------------|
| FLOT1_MOUSE | <i>Flot1</i>    |
| FLOT2_MOUSE | <i>Flot2</i>    |
| FRIH_MOUSE  | <i>Fth1</i>     |
| FSCN1_MOUSE | <i>Fscn1</i>    |
| G3P_MOUSE   | <i>Gapdh</i>    |
| G3PT_MOUSE  | <i>Gapdhs</i>   |
| G6PI_MOUSE  | <i>Gpi</i>      |
| GABT_MOUSE  | <i>Abat</i>     |
| GAK_MOUSE   | <i>Gak</i>      |
| GAL3A_MOUSE | <i>Gatd3a</i>   |
| GANAB_MOUSE | <i>Ganab</i>    |
| GARS_MOUSE  | <i>Gars1</i>    |
| GBB1_MOUSE  | <i>Gnb1</i>     |
| GBB3_MOUSE  | <i>Gnb3</i>     |
| GBRA1_MOUSE | <i>Gabra1</i>   |
| GD1L1_MOUSE | <i>Gdap111</i>  |
| GDAP1_MOUSE | <i>Gdap1</i>    |
| GDIA_MOUSE  | <i>Gdi1</i>     |
| GDIB_MOUSE  | <i>Gdi2</i>     |
| GDIR1_MOUSE | <i>Arhgdia</i>  |
| GELS_MOUSE  | <i>Gsn</i>      |
| GEPH_MOUSE  | <i>Gphn</i>     |
| GFAP_MOUSE  | <i>Gfap</i>     |
| GGT7_MOUSE  | <i>Ggt7</i>     |
| GHC1_MOUSE  | <i>Slc25a22</i> |
| GHC2_MOUSE  | <i>Slc25a18</i> |
| GIT1_MOUSE  | <i>Git1</i>     |
| GLNA_MOUSE  | <i>Glul</i>     |
| GLO2_MOUSE  | <i>Hagh</i>     |
| GLOD4_MOUSE | <i>Glod4</i>    |
| GLPK_MOUSE  | <i>Gk</i>       |
| GLPK2_MOUSE | <i>Gk2</i>      |
| GLRX5_MOUSE | <i>Glrx5</i>    |
| GLSK_MOUSE  | <i>Gls</i>      |
| GLU2B_MOUSE | <i>Prkcsh</i>   |
| GMFB_MOUSE  | <i>Gmfb</i>     |
| GMFG_MOUSE  | <i>Gmfg</i>     |
| GNA11_MOUSE | <i>Gna11</i>    |
| GNA12_MOUSE | <i>Gna12</i>    |



|             |                 |
|-------------|-----------------|
| GNAS1_MOUSE | <i>Gnas</i>     |
| GNB5_MOUSE  | <i>Gnb5</i>     |
| GP158_MOUSE | <i>Gpr158</i>   |
| GPC1_MOUSE  | <i>Gpc1</i>     |
| GPD1L_MOUSE | <i>Gpd1l</i>    |
| GPDM_MOUSE  | <i>Gpd2</i>     |
| GPM6B_MOUSE | <i>Gpm6b</i>    |
| GRB2_MOUSE  | <i>Grb2</i>     |
| GRIN1_MOUSE | <i>Gprin1</i>   |
| GRM3_MOUSE  | <i>Grm3</i>     |
| GRP75_MOUSE | <i>Hspa9</i>    |
| GRPE1_MOUSE | <i>Grpel1</i>   |
| GSTM1_MOUSE | <i>Gstm1</i>    |
| GSTM3_MOUSE | <i>Gstm3</i>    |
| GSTM5_MOUSE | <i>Gstm5</i>    |
| GSTM6_MOUSE | <i>Gstm6</i>    |
| GSTP1_MOUSE | <i>Gstp1</i>    |
| GSTP2_MOUSE | <i>Gstp2</i>    |
| GTR3_MOUSE  | <i>Slc2a3</i>   |
| GUAD_MOUSE  | <i>Gda</i>      |
| H4_MOUSE    | <i>H4c1</i>     |
| HBA_MOUSE   | <i>Hba</i>      |
| HBAZ_MOUSE  | <i>Hbz</i>      |
| HBB1_MOUSE  | <i>Hbb-b1</i>   |
| HCD2_MOUSE  | <i>Hsd17b10</i> |
| HCDH_MOUSE  | <i>Hadh</i>     |
| HDHD2_MOUSE | <i>Hdhd2</i>    |
| HECAM_MOUSE | <i>Hepacam</i>  |
| HEMH_MOUSE  | <i>Fech</i>     |
| HGS_MOUSE   | <i>Hgs</i>      |
| HIBCH_MOUSE | <i>Hibch</i>    |
| HINT2_MOUSE | <i>Hint2</i>    |
| HMGCL_MOUSE | <i>Hmgcl</i>    |
| HMOX2_MOUSE | <i>Hmox2</i>    |
| HNRPK_MOUSE | <i>Hnrnpk</i>   |
| HOME1_MOUSE | <i>Homer1</i>   |
| HOME3_MOUSE | <i>Homer3</i>   |
| HPCA_MOUSE  | <i>Hpca</i>     |
| HPCL4_MOUSE | <i>Hpcal4</i>   |

|             |                 |
|-------------|-----------------|
| HPRT_MOUSE  | <i>Hprt1</i>    |
| HS105_MOUSE | <i>Hsph1</i>    |
| HS12B_MOUSE | <i>Hspa12b</i>  |
| HS71A_MOUSE | <i>Hspa1a</i>   |
| HS74L_MOUSE | <i>Hspa4l</i>   |
| HS90A_MOUSE | <i>Hsp90aa1</i> |
| HS90B_MOUSE | <i>Hsp90ab1</i> |
| HSP72_MOUSE | <i>Hspa2</i>    |
| HSP7C_MOUSE | <i>Hspa8</i>    |
| ICAM5_MOUSE | <i>Icam5</i>    |
| IDH3A_MOUSE | <i>Idh3a</i>    |
| IDHC_MOUSE  | <i>Idh1</i>     |
| IDHG1_MOUSE | <i>Idh3g</i>    |
| IDHP_MOUSE  | <i>Idh2</i>     |
| IF4B_MOUSE  | <i>Eif4b</i>    |
| IF4H_MOUSE  | <i>Eif4h</i>    |
| IF5A1_MOUSE | <i>Eif5a</i>    |
| IF5A2_MOUSE | <i>Eif5a2</i>   |
| IGSF8_MOUSE | <i>Igsf8</i>    |
| IMB1_MOUSE  | <i>Kpnb1</i>    |
| IPO5_MOUSE  | <i>Ipo5</i>     |
| IPYR_MOUSE  | <i>Ppa1</i>     |
| IPYR2_MOUSE | <i>Ppa2</i>     |
| IQEC1_MOUSE | <i>Iqsec1</i>   |
| IQEC2_MOUSE | <i>Iqsec2</i>   |
| ITIH2_MOUSE | <i>Itih2</i>    |
| K0513_MOUSE | <i>Kiaa0513</i> |
| KAD1_MOUSE  | <i>Ak1</i>      |
| KAD2_MOUSE  | <i>Ak2</i>      |
| KAD3_MOUSE  | <i>Ak3</i>      |
| KAD4_MOUSE  | <i>Ak4</i>      |
| KAP2_MOUSE  | <i>Prkar2a</i>  |
| KAP3_MOUSE  | <i>Prkar2b</i>  |
| KCAB2_MOUSE | <i>Kcnab2</i>   |
| KCC2A_MOUSE | <i>Camk2a</i>   |
| KCC2B_MOUSE | <i>Camk2b</i>   |
| KCC2G_MOUSE | <i>Camk2g</i>   |
| KCRS_MOUSE  | <i>Ckmt2</i>    |
| KCRU_MOUSE  | <i>Ckmt1</i>    |

|             |               |
|-------------|---------------|
| KCY_MOUSE   | <i>Cmpk1</i>  |
| KIF2A_MOUSE | <i>Kif2a</i>  |
| KLC1_MOUSE  | <i>Klc1</i>   |
| KLC2_MOUSE  | <i>Klc2</i>   |
| KPCB_MOUSE  | <i>Prkcb</i>  |
| KPCG_MOUSE  | <i>Prkcg</i>  |
| KPYM_MOUSE  | <i>Pkm</i>    |
| KPYR_MOUSE  | <i>Pklr</i>   |
| L1CAM_MOUSE | <i>L1cam</i>  |
| LACTB_MOUSE | <i>Lactb</i>  |
| LANC2_MOUSE | <i>Lancl2</i> |
| LASP1_MOUSE | <i>Lasp1</i>  |
| LDHA_MOUSE  | <i>Ldha</i>   |
| LDHC_MOUSE  | <i>Ldhc</i>   |
| LGUL_MOUSE  | <i>Glo1</i>   |
| LIGO1_MOUSE | <i>Lingo1</i> |
| LIN7A_MOUSE | <i>Lin7a</i>  |
| LIPA2_MOUSE | <i>Ppfia2</i> |
| LNEBL_MOUSE | <i>Nebi</i>   |
| LONM_MOUSE  | <i>Lonp1</i>  |
| LPPRC_MOUSE | <i>Lrpprc</i> |
| LRC59_MOUSE | <i>Lrrc59</i> |
| LSAMP_MOUSE | <i>Lsamp</i>  |
| LXN_MOUSE   | <i>Lxn</i>    |
| LY6H_MOUSE  | <i>Ly6h</i>   |
| LYAG_MOUSE  | <i>Gaa</i>    |
| LYRIC_MOUSE | <i>Mtdh</i>   |
| MAG_MOUSE   | <i>Mag</i>    |
| MAOM_MOUSE  | <i>Me2</i>    |
| MAON_MOUSE  | <i>Me3</i>    |
| MAP1A_MOUSE | <i>Map1a</i>  |
| MAP1B_MOUSE | <i>Map1b</i>  |
| MAP4_MOUSE  | <i>Map4</i>   |
| MAP6_MOUSE  | <i>Map6</i>   |
| MARC2_MOUSE | <i>Marc2</i>  |
| MARCS_MOUSE | <i>Marcks</i> |
| MARE1_MOUSE | <i>Mapre1</i> |
| MARE2_MOUSE | <i>Mapre2</i> |
| MARE3_MOUSE | <i>Mapre3</i> |

|             |                |
|-------------|----------------|
| MBP_MOUSE   | <i>Mbp</i>     |
| MCU_MOUSE   | <i>Mcu</i>     |
| MDHC_MOUSE  | <i>Mdh1</i>    |
| MDHM_MOUSE  | <i>Mdh2</i>    |
| MFF_MOUSE   | <i>Mff</i>     |
| MFN2_MOUSE  | <i>Mfn2</i>    |
| MFR1L_MOUSE | <i>Mtfr1l</i>  |
| MGLL_MOUSE  | <i>Mgll</i>    |
| MIC13_MOUSE | <i>Micos13</i> |
| MIC19_MOUSE | <i>Chchd3</i>  |
| MIC25_MOUSE | <i>Chchd6</i>  |
| MIC26_MOUSE | <i>Apoo</i>    |
| MIC60_MOUSE | <i>Immt</i>    |
| MIF_MOUSE   | <i>Mif</i>     |
| MK01_MOUSE  | <i>Mapk1</i>   |
| MK03_MOUSE  | <i>Mapk3</i>   |
| MK04_MOUSE  | <i>Mapk4</i>   |
| ML12B_MOUSE | <i>Myl12b</i>  |
| MMSA_MOUSE  | <i>Aldh6a1</i> |
| MOG_MOUSE   | <i>Mog</i>     |
| MP2K1_MOUSE | <i>Map2k1</i>  |
| MPCP_MOUSE  | <i>Slc25a3</i> |
| MPPA_MOUSE  | <i>Pmpca</i>   |
| MTAP2_MOUSE | <i>Map2</i>    |
| MTCH1_MOUSE | <i>Mtch1</i>   |
| MTCH2_MOUSE | <i>Mtch2</i>   |
| MTCL1_MOUSE | <i>Mtcl1</i>   |
| MTX1_MOUSE  | <i>Mtx1</i>    |
| MTX2_MOUSE  | <i>Mtx2</i>    |
| MUTA_MOUSE  | <i>Mmut</i>    |
| MY18A_MOUSE | <i>Myo18a</i>  |
| MYH10_MOUSE | <i>Myh10</i>   |
| MYL6_MOUSE  | <i>Myl6</i>    |
| MYL6B_MOUSE | <i>Myl6b</i>   |
| MYL9_MOUSE  | <i>Myl9</i>    |
| MYO5A_MOUSE | <i>Myo5a</i>   |
| MYO5B_MOUSE | <i>Myo5b</i>   |
| MYPR_MOUSE  | <i>Plp1</i>    |
| NAC2_MOUSE  | <i>Slc8a2</i>  |

|             |                |
|-------------|----------------|
| NB5R1_MOUSE | <i>Cyb5r1</i>  |
| NB5R3_MOUSE | <i>Cyb5r3</i>  |
| NCAM1_MOUSE | <i>Ncam1</i>   |
| NCAM2_MOUSE | <i>Ncam2</i>   |
| NCAN_MOUSE  | <i>Ncan</i>    |
| NCDN_MOUSE  | <i>Ncdn</i>    |
| NCEH1_MOUSE | <i>Nceh1</i>   |
| NCKPL_MOUSE | <i>Nckap1l</i> |
| NCS1_MOUSE  | <i>Ncs1</i>    |
| NDKB_MOUSE  | <i>Nme2</i>    |
| NDRG1_MOUSE | <i>Ndrg1</i>   |
| NDRG2_MOUSE | <i>Ndrg2</i>   |
| NDRG3_MOUSE | <i>Ndrg3</i>   |
| NDUA2_MOUSE | <i>Ndufa2</i>  |
| NDUA4_MOUSE | <i>Ndufa4</i>  |
| NDUA5_MOUSE | <i>Ndufa5</i>  |
| NDUA7_MOUSE | <i>Ndufa7</i>  |
| NDUA8_MOUSE | <i>Ndufa8</i>  |
| NDUA9_MOUSE | <i>Ndufa9</i>  |
| NDUAA_MOUSE | <i>Ndufa10</i> |
| NDUAC_MOUSE | <i>Ndufa12</i> |
| NDUAD_MOUSE | <i>Ndufa13</i> |
| NDUB3_MOUSE | <i>Ndufb3</i>  |
| NDUB4_MOUSE | <i>Ndufb4</i>  |
| NDUB5_MOUSE | <i>Ndufb5</i>  |
| NDUB6_MOUSE | <i>Ndufb6</i>  |
| NDUB7_MOUSE | <i>Ndufb7</i>  |
| NDUB8_MOUSE | <i>Ndufb8</i>  |
| NDUB9_MOUSE | <i>Ndufb9</i>  |
| NDUBA_MOUSE | <i>Ndufb10</i> |
| NDUBB_MOUSE | <i>Ndufb11</i> |
| NDUC2_MOUSE | <i>Ndufc2</i>  |
| NDUF2_MOUSE | <i>Ndufaf2</i> |
| NDUS2_MOUSE | <i>Ndufs2</i>  |
| NDUS3_MOUSE | <i>Ndufs3</i>  |
| NDUS4_MOUSE | <i>Ndufs4</i>  |
| NDUS5_MOUSE | <i>Ndufs5</i>  |
| NDUS6_MOUSE | <i>Ndufs6</i>  |
| NDUS7_MOUSE | <i>Ndufs7</i>  |

|             |                 |
|-------------|-----------------|
| NDUS8_MOUSE | <i>Ndufs8</i>   |
| NDUV1_MOUSE | <i>Ndufv1</i>   |
| NDUV2_MOUSE | <i>Ndufv2</i>   |
| NEB2_MOUSE  | <i>Ppp1r9b</i>  |
| NECP1_MOUSE | <i>Necap1</i>   |
| NECT1_MOUSE | <i>Nectin1</i>  |
| NEGR1_MOUSE | <i>Negr1</i>    |
| NEUM_MOUSE  | <i>Gap43</i>    |
| NFH_MOUSE   | <i>Nefh</i>     |
| NFL_MOUSE   | <i>Nefl</i>     |
| NFM_MOUSE   | <i>Nefm</i>     |
| NFS1_MOUSE  | <i>Nfs1</i>     |
| NFU1_MOUSE  | <i>Nfu1</i>     |
| NHRF1_MOUSE | <i>Slc9a3r1</i> |
| NIPS1_MOUSE | <i>Nipsnap1</i> |
| NIPS2_MOUSE | <i>Nipsnap2</i> |
| NLGN2_MOUSE | <i>Nlgn2</i>    |
| NLGN3_MOUSE | <i>Nlgn3</i>    |
| NMDE2_MOUSE | <i>Grin2b</i>   |
| NMDZ1_MOUSE | <i>Grin1</i>    |
| NNRD_MOUSE  | <i>Naxd</i>     |
| NNRE_MOUSE  | <i>Naxe</i>     |
| NOE1_MOUSE  | <i>Olfm1</i>    |
| NP1L1_MOUSE | <i>Nap1l1</i>   |
| NP1L4_MOUSE | <i>Nap1l4</i>   |
| NPTN_MOUSE  | <i>Nptn</i>     |
| NPTX1_MOUSE | <i>Nptx1</i>    |
| NPTXR_MOUSE | <i>Nptxr</i>    |
| NRX1A_MOUSE | <i>Nrxn1</i>    |
| NRX1B_MOUSE | <i>Nrxn1</i>    |
| NRX3B_MOUSE | <i>Nrxn3</i>    |
| NSF1C_MOUSE | <i>Nsfl1c</i>   |
| NT5C_MOUSE  | <i>Nt5c</i>     |
| NT5D3_MOUSE | <i>Nt5dc3</i>   |
| NTRK2_MOUSE | <i>Ntrk2</i>    |
| OCAD1_MOUSE | <i>Ociad1</i>   |
| OCAD2_MOUSE | <i>Ociad2</i>   |
| ODO2_MOUSE  | <i>Dlst</i>     |
| ODP2_MOUSE  | <i>Dlat</i>     |

|             |                 |
|-------------|-----------------|
| ODPA_MOUSE  | <i>Pdha1</i>    |
| ODPB_MOUSE  | <i>Pdhb</i>     |
| OMGP_MOUSE  | <i>Omg</i>      |
| OMP_MOUSE   | <i>Omp</i>      |
| OST48_MOUSE | <i>Ddost</i>    |
| OTUB1_MOUSE | <i>Otub1</i>    |
| OX2G_MOUSE  | <i>Cd200</i>    |
| PA1B2_MOUSE | <i>Pafah1b2</i> |
| PACN1_MOUSE | <i>Pacsin1</i>  |
| PACS1_MOUSE | <i>Pacs1</i>    |
| PAK1_MOUSE  | <i>Pak1</i>     |
| PALM_MOUSE  | <i>Palm</i>     |
| PARK7_MOUSE | <i>Park7</i>    |
| PCBP1_MOUSE | <i>Pcbp1</i>    |
| PCBP2_MOUSE | <i>Pcbp2</i>    |
| PCCB_MOUSE  | <i>Pccb</i>     |
| PCLO_MOUSE  | <i>Pclo</i>     |
| PDCD6_MOUSE | <i>Pdcd6</i>    |
| PDIA1_MOUSE | <i>P4hb</i>     |
| PDIA3_MOUSE | <i>Pdia3</i>    |
| PDIA6_MOUSE | <i>Pdia6</i>    |
| PDXK_MOUSE  | <i>Pdxk</i>     |
| PEA15_MOUSE | <i>Pea15</i>    |
| PEBP1_MOUSE | <i>Pebp1</i>    |
| PFKAL_MOUSE | <i>Pfkl</i>     |
| PFKAM_MOUSE | <i>Pfkm</i>     |
| PFKAP_MOUSE | <i>Pfkp</i>     |
| PGAM1_MOUSE | <i>Pgam1</i>    |
| PGAM2_MOUSE | <i>Pgam2</i>    |
| PGCB_MOUSE  | <i>Bcan</i>     |
| PGES2_MOUSE | <i>Ptges2</i>   |
| PGK1_MOUSE  | <i>Pgk1</i>     |
| PGM2L_MOUSE | <i>Pgm2l1</i>   |
| PGRC1_MOUSE | <i>Pgrmc1</i>   |
| PHB_MOUSE   | <i>Phb</i>      |
| PHB2_MOUSE  | <i>Phb2</i>     |
| PHF24_MOUSE | <i>Phf24</i>    |
| PHIPL_MOUSE | <i>Phyhipl</i>  |
| PI51C_MOUSE | <i>Pip5k1c</i>  |

|             |               |
|-------------|---------------|
| PIMT_MOUSE  | <i>Pcmt1</i>  |
| PIPNA_MOUSE | <i>Pitpna</i> |
| PKP4_MOUSE  | <i>Pkp4</i>   |
| PLEC_MOUSE  | <i>Plec</i>   |
| PP1A_MOUSE  | <i>Ppp1ca</i> |
| PP1R7_MOUSE | <i>Ppp1r7</i> |
| PP2AB_MOUSE | <i>Ppp2cb</i> |
| PP2BB_MOUSE | <i>Ppp3cb</i> |
| PP2BC_MOUSE | <i>Ppp3cc</i> |
| PPIA_MOUSE  | <i>Ppia</i>   |
| PPIB_MOUSE  | <i>Ppib</i>   |
| PRDX1_MOUSE | <i>Prdx1</i>  |
| PRDX2_MOUSE | <i>Prdx2</i>  |
| PRDX3_MOUSE | <i>Prdx3</i>  |
| PRDX5_MOUSE | <i>Prdx5</i>  |
| PROF1_MOUSE | <i>Pfn1</i>   |
| PROF2_MOUSE | <i>Pfn2</i>   |
| PRRT2_MOUSE | <i>Prrt2</i>  |
| PSA_MOUSE   | <i>Npepps</i> |
| PSA1_MOUSE  | <i>Psma1</i>  |
| PSA5_MOUSE  | <i>Psma5</i>  |
| PSA7_MOUSE  | <i>Psma7</i>  |
| PSD3_MOUSE  | <i>Psd3</i>   |
| PTN11_MOUSE | <i>Ptpn11</i> |
| PTPR2_MOUSE | <i>Ptprn2</i> |
| PTPRZ_MOUSE | <i>Ptprz1</i> |
| PURA_MOUSE  | <i>Pura</i>   |
| PURB_MOUSE  | <i>Purb</i>   |
| PYC_MOUSE   | <i>Pc</i>     |
| PYGM_MOUSE  | <i>Pygm</i>   |
| QCR1_MOUSE  | <i>Uqcrc1</i> |
| QCR2_MOUSE  | <i>Uqcrc2</i> |
| QCR7_MOUSE  | <i>Uqcrb</i>  |
| QCR8_MOUSE  | <i>Uqcrq</i>  |
| RAB10_MOUSE | <i>Rab10</i>  |
| RAB14_MOUSE | <i>Rab14</i>  |
| RAB2A_MOUSE | <i>Rab2a</i>  |
| RAB3A_MOUSE | <i>Rab3a</i>  |
| RAB3C_MOUSE | <i>Rab3c</i>  |



|             |                |
|-------------|----------------|
| RAB5B_MOUSE | <i>Rab5b</i>   |
| RAB5C_MOUSE | <i>Rab5c</i>   |
| RAB6A_MOUSE | <i>Rab6a</i>   |
| RAC1_MOUSE  | <i>Rac1</i>    |
| RAC2_MOUSE  | <i>Rac2</i>    |
| RACK1_MOUSE | <i>Rack1</i>   |
| RALA_MOUSE  | <i>Rala</i>    |
| RANG_MOUSE  | <i>Ranbp1</i>  |
| RAP2A_MOUSE | <i>Rap2a</i>   |
| RASL1_MOUSE | <i>Rasal1</i>  |
| RB11A_MOUSE | <i>Rab11a</i>  |
| RB11B_MOUSE | <i>Rab11b</i>  |
| RB27B_MOUSE | <i>Rab27b</i>  |
| RCN2_MOUSE  | <i>Rcn2</i>    |
| RD23B_MOUSE | <i>Rad23b</i>  |
| RGS6_MOUSE  | <i>Rgs6</i>    |
| RGS7_MOUSE  | <i>Rgs7</i>    |
| RHG01_MOUSE | <i>Arhgap1</i> |
| RHOA_MOUSE  | <i>Rhoa</i>    |
| RHOB_MOUSE  | <i>Rhob</i>    |
| RIDA_MOUSE  | <i>Rida</i>    |
| RILP_MOUSE  | <i>Rilp</i>    |
| RIMS1_MOUSE | <i>Rims1</i>   |
| RL13_MOUSE  | <i>Rpl13</i>   |
| RLA2_MOUSE  | <i>Rplp2</i>   |
| RP3A_MOUSE  | <i>Rph3a</i>   |
| RS18_MOUSE  | <i>Rps18</i>   |
| RS19_MOUSE  | <i>Rps19</i>   |
| RS28_MOUSE  | <i>Rps28</i>   |
| RT23_MOUSE  | <i>Mrps23</i>  |
| RT36_MOUSE  | <i>Mrps36</i>  |
| RTN1_MOUSE  | <i>Rtn1</i>    |
| RTN3_MOUSE  | <i>Rtn3</i>    |
| RTN4_MOUSE  | <i>Rtn4</i>    |
| RUFY3_MOUSE | <i>Rufy3</i>   |
| S12A5_MOUSE | <i>Slc12a5</i> |
| S4A10_MOUSE | <i>Slc4a10</i> |
| S4A4_MOUSE  | <i>Slc4a4</i>  |
| S4A8_MOUSE  | <i>Slc4a8</i>  |

|             |                 |
|-------------|-----------------|
| S6A11_MOUSE | <i>Slc6a11</i>  |
| S6A17_MOUSE | <i>Slc6a17</i>  |
| SAHH3_MOUSE | <i>Ahcyl2</i>   |
| SAM50_MOUSE | <i>Samm50</i>   |
| SC22B_MOUSE | <i>Sec22b</i>   |
| SC6A6_MOUSE | <i>Slc6a6</i>   |
| SCMC3_MOUSE | <i>Slc25a23</i> |
| SCN2A_MOUSE | <i>Scn2a</i>    |
| SCN2B_MOUSE | <i>Scn2b</i>    |
| SCOT1_MOUSE | <i>Oxct1</i>    |
| SCPDL_MOUSE | <i>Scppdh</i>   |
| SCRN1_MOUSE | <i>Scrn1</i>    |
| SDHA_MOUSE  | <i>Sdha</i>     |
| SEP11_MOUSE | <i>Septin11</i> |
| SEPT3_MOUSE | <i>Septin3</i>  |
| SEPT4_MOUSE | <i>Septin4</i>  |
| SEPT5_MOUSE | <i>Septin5</i>  |
| SEPT6_MOUSE | <i>Septin6</i>  |
| SEPT7_MOUSE | <i>Septin7</i>  |
| SEPT9_MOUSE | <i>Septin9</i>  |
| SERA_MOUSE  | <i>Phgdh</i>    |
| SERC_MOUSE  | <i>Psat1</i>    |
| SFXN5_MOUSE | <i>Sfxn5</i>    |
| SGIP1_MOUSE | <i>Sgip1</i>    |
| SGTA_MOUSE  | <i>Sgta</i>     |
| SH3G1_MOUSE | <i>Sh3gl1</i>   |
| SH3G2_MOUSE | <i>Sh3gl2</i>   |
| SHAN1_MOUSE | <i>Shank1</i>   |
| SHAN2_MOUSE | <i>Shank2</i>   |
| SHAN3_MOUSE | <i>Shank3</i>   |
| SHLB2_MOUSE | <i>Sh3glb2</i>  |
| SHPS1_MOUSE | <i>Sirpa</i>    |
| SHSA7_MOUSE | <i>Shisa7</i>   |
| SIR2_MOUSE  | <i>Sirt2</i>    |
| SKP1_MOUSE  | <i>Skp1</i>     |
| SLIRP_MOUSE | <i>Slirp</i>    |
| SMCE1_MOUSE | <i>Smarce1</i>  |
| SNAA_MOUSE  | <i>Napa</i>     |
| SNAB_MOUSE  | <i>Napb</i>     |

|             |                |
|-------------|----------------|
| SNAG_MOUSE  | <i>Napg</i>    |
| SNG1_MOUSE  | <i>Syngr1</i>  |
| SNG3_MOUSE  | <i>Syngr3</i>  |
| SNP23_MOUSE | <i>Snap23</i>  |
| SNP25_MOUSE | <i>Snap25</i>  |
| SNPH_MOUSE  | <i>Snph</i>    |
| SNX1_MOUSE  | <i>Snx1</i>    |
| SODC_MOUSE  | <i>Sod1</i>    |
| SODM_MOUSE  | <i>Sod2</i>    |
| SOGA3_MOUSE | <i>Soga3</i>   |
| SPRE_MOUSE  | <i>Spr</i>     |
| SPTB1_MOUSE | <i>Sptb</i>    |
| SPTB2_MOUSE | <i>Sptbn1</i>  |
| SPTN1_MOUSE | <i>Sptan1</i>  |
| SRC8_MOUSE  | <i>Ctnn</i>    |
| SRCN1_MOUSE | <i>Srcin1</i>  |
| SRR_MOUSE   | <i>Srr</i>     |
| SSBP_MOUSE  | <i>Ssbp1</i>   |
| STAM1_MOUSE | <i>Stam</i>    |
| STIP1_MOUSE | <i>Stip1</i>   |
| STMN1_MOUSE | <i>Stmn1</i>   |
| STX12_MOUSE | <i>Stx12</i>   |
| STX1A_MOUSE | <i>Stx1a</i>   |
| STX1B_MOUSE | <i>Stx1b</i>   |
| STX2_MOUSE  | <i>Stx2</i>    |
| SUCA_MOUSE  | <i>Suclg1</i>  |
| SUCB1_MOUSE | <i>Sucla2</i>  |
| SV2A_MOUSE  | <i>Sv2a</i>    |
| SV2B_MOUSE  | <i>Sv2b</i>    |
| SYAC_MOUSE  | <i>Aars</i>    |
| SYBU_MOUSE  | <i>Sybu</i>    |
| SYGP1_MOUSE | <i>Syngap1</i> |
| SYN1_MOUSE  | <i>Syn1</i>    |
| SYN2_MOUSE  | <i>Syn2</i>    |
| SYN3_MOUSE  | <i>Syn3</i>    |
| SYNPO_MOUSE | <i>Synpo</i>   |
| SYPH_MOUSE  | <i>Syp</i>     |
| SYSC_MOUSE  | <i>Sars</i>    |
| SYT1_MOUSE  | <i>Syt1</i>    |

|             |                |
|-------------|----------------|
| SYUB_MOUSE  | <i>Sncb</i>    |
| TAGL_MOUSE  | <i>Tagln</i>   |
| TAGL2_MOUSE | <i>Tagln2</i>  |
| TAGL3_MOUSE | <i>Tagln3</i>  |
| TALDO_MOUSE | <i>Taldo1</i>  |
| TAU_MOUSE   | <i>Mapt</i>    |
| TBA4A_MOUSE | <i>Tuba4a</i>  |
| TBB2A_MOUSE | <i>Tubb2a</i>  |
| TBB3_MOUSE  | <i>Tubb3</i>   |
| TBB4A_MOUSE | <i>Tubb4a</i>  |
| TBB4B_MOUSE | <i>Tubb4b</i>  |
| TBB5_MOUSE  | <i>Tubb5</i>   |
| TBB6_MOUSE  | <i>Tubb6</i>   |
| TBC8B_MOUSE | <i>Tbc1d8b</i> |
| TCPA_MOUSE  | <i>Tcp1</i>    |
| TCPB_MOUSE  | <i>Cct2</i>    |
| TCPD_MOUSE  | <i>Cct4</i>    |
| TCPE_MOUSE  | <i>Cct5</i>    |
| TCPG_MOUSE  | <i>Cct3</i>    |
| TCPQ_MOUSE  | <i>Cct8</i>    |
| TCPW_MOUSE  | <i>Cct6b</i>   |
| TCPZ_MOUSE  | <i>Cct6a</i>   |
| TCTP_MOUSE  | <i>Tpt1</i>    |
| TENR_MOUSE  | <i>Tnr</i>     |
| THEM4_MOUSE | <i>Them4</i>   |
| THIL_MOUSE  | <i>Acat1</i>   |
| THIM_MOUSE  | <i>Acaa2</i>   |
| THIO_MOUSE  | <i>Txn</i>     |
| THIOM_MOUSE | <i>Txn2</i>    |
| THTM_MOUSE  | <i>Mpst</i>    |
| THTR_MOUSE  | <i>Tst</i>     |
| TIM44_MOUSE | <i>Timm44</i>  |
| TIM50_MOUSE | <i>Timm50</i>  |
| TKT_MOUSE   | <i>Tkt</i>     |
| TLN2_MOUSE  | <i>Tln2</i>    |
| TM1L2_MOUSE | <i>Tom1l2</i>  |
| TMM65_MOUSE | <i>Tmem65</i>  |
| TMOD2_MOUSE | <i>Tmod2</i>   |
| TMOD3_MOUSE | <i>Tmod3</i>   |

|             |                 |
|-------------|-----------------|
| TNNC2_MOUSE | <i>Tnnc2</i>    |
| TOLIP_MOUSE | <i>Tollip</i>   |
| TOM1_MOUSE  | <i>Tom1</i>     |
| TOM22_MOUSE | <i>Tomm22</i>   |
| TOM70_MOUSE | <i>Tomm70</i>   |
| TPD52_MOUSE | <i>Tpd52</i>    |
| TPD54_MOUSE | <i>Tpd52l2</i>  |
| TPIS_MOUSE  | <i>Tpi1</i>     |
| TPM2_MOUSE  | <i>Tpm2</i>     |
| TPM3_MOUSE  | <i>Tpm3</i>     |
| TPM4_MOUSE  | <i>Tpm4</i>     |
| TPPP_MOUSE  | <i>Tppp</i>     |
| TPRGL_MOUSE | <i>Tprg1l</i>   |
| TRAP1_MOUSE | <i>Trap1</i>    |
| TRFE_MOUSE  | <i>Tf</i>       |
| TTHY_MOUSE  | <i>Ttr</i>      |
| TTYH1_MOUSE | <i>Ttyh1</i>    |
| TWF2_MOUSE  | <i>Twf2</i>     |
| TXTP_MOUSE  | <i>Slc25a1</i>  |
| UB2V1_MOUSE | <i>Ube2v1</i>   |
| UBA1Y_MOUSE | <i>Uba1y</i>    |
| UBE2N_MOUSE | <i>Ube2n</i>    |
| UBP5_MOUSE  | <i>Usp5</i>     |
| UHL1_MOUSE  | <i>Uchl1</i>    |
| UHL3_MOUSE  | <i>Uchl3</i>    |
| UHL4_MOUSE  | <i>Uchl4</i>    |
| UGPA_MOUSE  | <i>Ugp2</i>     |
| VAMP2_MOUSE | <i>Vamp2</i>    |
| VAMP3_MOUSE | <i>Vamp3</i>    |
| VAPA_MOUSE  | <i>Vapa</i>     |
| VAPB_MOUSE  | <i>Vapb</i>     |
| VAT1L_MOUSE | <i>Vat1l</i>    |
| VATA_MOUSE  | <i>Atp6v1a</i>  |
| VATB2_MOUSE | <i>Atp6v1b2</i> |
| VATC1_MOUSE | <i>Atp6v1c1</i> |
| VATD_MOUSE  | <i>Atp6v1d</i>  |
| VATE2_MOUSE | <i>Atp6v1e2</i> |
| VATF_MOUSE  | <i>Atp6v1f</i>  |
| VATG2_MOUSE | <i>Atp6v1g2</i> |

|             |                 |
|-------------|-----------------|
| VATH_MOUSE  | <i>Atp6v1h</i>  |
| VDAC1_MOUSE | <i>Vdac1</i>    |
| VDAC3_MOUSE | <i>Vdac3</i>    |
| VGLU1_MOUSE | <i>Slc17a7</i>  |
| VGLU3_MOUSE | <i>Slc17a8</i>  |
| VINC_MOUSE  | <i>Vcl</i>      |
| VP26B_MOUSE | <i>Vps26b</i>   |
| VPP1_MOUSE  | <i>Atp6v0a1</i> |
| VPP2_MOUSE  | <i>Atp6v0a2</i> |
| WASF1_MOUSE | <i>Wasf1</i>    |
| WASF3_MOUSE | <i>Wasf3</i>    |
| WBP2_MOUSE  | <i>Wbp2</i>     |
| WDR1_MOUSE  | <i>Wdr1</i>     |
| WDR7_MOUSE  | <i>Wdr7</i>     |
| YKT6_MOUSE  | <i>Ykt6</i>     |
