# Supplementary material for: Identification of substrates of palmitoyl protein thioesterase 1 highlights roles of depalmitoylation in disulfide bond formation and synaptic function
Source: PubMed Central journal article supplement (PMC9004782; doi:10.1371/journal.pbio.3001590), 2022-03-31
Supplement: pbio.3001590.s006.pdf [file pbio.3001590.s006.pdf]

**S5 Table. Carbamidomethyl-modified peptides for high-confidence PPT1 substrates.** Protein localization and disulfide bond data were gathered from the UniProt entry for each protein. Carbamidomethyl (carba.) sites that were *not* validated in the tertiary screen are indicated by an asterisk (\*). Disulfide bonds validated by a dNEM moiety in the tertiary screen are indicated (X). Mitochondrial membrane (MM), synaptic plasma membrane (SPM), GPI anchor (GPI).

| UniProt Accession | Peptide                                        | Carba. site in peptide | Protein localization | Peptide site in protein | Peptide localization | Cysteine site | Disulfide Bond   | dNEM |
|-------------------|------------------------------------------------|------------------------|----------------------|-------------------------|----------------------|---------------|------------------|------|
| AT1A1_MOUSE       | LIIVEG <u>C</u> QR                             | 7                      | SPM                  | 699-707                 | Cytoplasmic          | 705           |                  |      |
| AT1A2_MOUSE       | LIIVEG <u>C</u> QR                             | 7                      | SPM                  | 696-704                 | Cytoplasmic          | 702           |                  |      |
| AT1A3_MOUSE       | LIIVEG <u>C</u> QR                             | 7                      | SPM                  | 689-697                 | Cytoplasmic          | 705           |                  |      |
| AT1A3_MOUSE       | VLGF <u>C</u> HYYLPEEQFPK                      | 5                      | SPM                  | 542-557                 | Cytoplasmic          | 546           |                  |      |
| AT1A3_MOUSE       | YNTD <u>C</u> VQGLTHSK                         | 5                      | SPM                  | 45-56                   | Cytoplasmic          | 49            |                  |      |
| AT1B1_MOUSE       | DSAQKDDMIFED <u>C</u> GNVPSEPK                 | 13                     | SPM                  | 114-134                 | Extracellular        | 126           | to 149           | X    |
| AT1B1_MOUSE       | YNPNVLPVQ <u>C</u> TGK                         | 10                     | SPM                  | 205-217                 | Extracellular        | 214           | to 277           |      |
| AT1B2_MOUSE       | TQLGD <u>C</u> SGIGDPHTHYGYSTGQP <u>C</u> VFIK | 6<br>23                | SPM                  | 155-181                 | Extracellular        | 160<br>177    | to 177<br>to 160 | X    |
| AT1B2_MOUSE       | FLNVTPNVEVNVE <u>C</u> R                       | 14                     | SPM                  | 248-262                 | Extracellular        | 261           | to 200           | X    |
| ATPO_MOUSE        | GEVP <u>C</u> TVTASPLDDAVLSELK                 | 5                      | MM                   | 137-158                 |                      | 141           |                  |      |
| BASI_MOUSE        | SGEYS <u>C</u> IFLPEPVGR                       | 6                      | SPM                  | 198-212                 | Extracellular        | 203           | to 157           |      |
| CADM2_MOUSE       | IIPSTPFQEGQALTLT <u>C</u> ESK                  | 18                     | SPM                  | 231-251                 | Extracellular        | 248           | to 296           |      |
| CADM2_MOUSE       | AYLTVLGVPEKPKQISGFSSPVMEGDLMQLT <u>C</u> K     | 31                     | SPM                  | 116-147                 | Extracellular        | 146           | to 203           |      |
| CD81_MOUSE        | TFHETLN <u>C</u> CGSNALTTLTITILR               | 8<br>9                 | SPM                  | 149-171                 | Extracellular        | 156<br>157    | to 190<br>to 175 |      |
| CISD1_MOUSE       | KFPF <u>C</u> DGAHIK                           | 5                      | MM                   | 79-89                   |                      | 83            |                  |      |
| DYL2_MOUSE        | NADMSEDMMQQDAVD <u>C</u> ATQAMEK               | 15                     | Cytosolic            | 10-31                   |                      | 24            |                  |      |
| GBB2_MOUSE        | V <u>S</u> <u>C</u> LGVTDDGMAVATGSWDSFLK       | 3                      | Cytosolic            | 315-337                 |                      | 317           |                  |      |
| GPM6A_MOUSE       | KI <u>C</u> TASENFLR                           | 3                      | SPM                  | 190-200                 | Extracellular        | 192           | to 174           | X    |
| GRIA1_MOUSE       | RGNAGD <u>C</u> LANPAVPWGQGIDIQR               | 7                      | SPM                  | 317-339                 | Extracellular        | 323           | to 75            |      |
| KCRB_MOUSE        | F <u>C</u> TGLTQIETLFK                         | 2                      | Cytosolic            | 253-265                 |                      | 254           |                  |      |
| LDHB_MOUSE        | VIGSG <u>C</u> NLDSAR                          | 6                      | Cytosolic            | 159-170                 |                      | 164           |                  |      |
| LGI1_MOUSE        | DFD <u>C</u> IITEFAK                           | 4                      | Secreted             | 218-228                 |                      | 221           |                  |      |
| NDKA_MOUSE        | GDF <u>C</u> IQVGR                             | 4                      | Nucleus              | 106-114                 |                      | 109           |                  |      |
| NDUS1_MOUSE       | M <u>C</u> LVEIEK                              | 2*                     | MM                   | 77-84                   |                      | 78            |                  |      |

|             |                        |    |           |         |               |     |        |   |
|-------------|------------------------|----|-----------|---------|---------------|-----|--------|---|
| NFASC_MOUSE | SGGRPEEYEGEYQCFAR      | 14 | SPM       | 105-121 | Extracellular | 118 | to 63  |   |
| NRCAM_MOUSE | DSTGTYTCVAR            | 8* | SPM       | 512-521 | Extracellular | 519 | to 470 |   |
| NRCAM_MOUSE | TLQITHVSEADSGNYQCIK    | 17 | SPM       | 318-337 | Extracellular | 334 | to 286 |   |
| NTRI_MOUSE  | GTLQCEASAVPSAEFQWFK    | 5  | SPM-GPI   | 239-257 | Extracellular | 243 | to 295 |   |
| NTRI_MOUSE  | EQSGEYECASNDVAAPVVR    | 8  | SPM-GPI   | 194-213 |               | 201 | to 257 |   |
| STXB1_MOUSE | AAHVFFTDSCPDAFNLVK     | 10 | Cytosolic | 101-120 |               | 110 |        |   |
| THY1_MOUSE  | VTSLTACLVNQNLK         | 7  | SPM-GPI   | 22-35   | Extracellular | 28  | to 131 | X |
| VDAC2_MOUSE | WCEYGLTFTEK            | 2  | SPM       | 76-86   | SPM           | 77  |        |   |
| VDAC2_MOUSE | WNTDNTLGTEIAIEDQICQGLK | 18 | SPM       | 87-108  | SPM           | 104 |        |   |
| VISL1_MOUSE | EFICALSITSR            | 4* | Cytosolic | 84-94   |               | 87  |        |   |
| VISL1_MOUSE | SDPSIVLLLQCIDIQK       | 11 | Cytosolic | 177-191 |               | 187 |        |   |
